# Supplementary material for: Synthesis of 3-arylamino-2-polyhydroxyalkyl-substituted indoles from unprotected saccharides and anilines
Source: Royal Society of Chemistry journal article supplement (doi:10.1039/d3gc04440h), 2024-01-01
Supplement: d3gc04440h1.pdf [file d3gc04440h1.pdf]

## Supporting Information

### Synthesis of 3-arylamino-2-polyhydroxyalkyl-substituted indoles from unprotected saccharides and anilines

JilaiWu,<sup>a</sup> Likai Zhou,<sup>ab</sup> Song Xie,<sup>a</sup> Chao Wei,<sup>a</sup> Xiaoliu Li,<sup>a</sup> Hua Chen<sup>\*, a</sup>

<sup>a</sup>key Laboratory of Chemical Biology of Hebei Province, College of Chemistry and Environmental Science, Hebei University, Baoding Hebei, 071002, P. R. China; Email: [hua-todd@163.com](mailto:hua-todd@163.com)

<sup>b</sup>College of Chemistry and Chemical Engineering, Xingtai University, Hebei, Xingtai, 054001, China

#### Contents

|                                      |     |
|--------------------------------------|-----|
| 1. General Considerations-----       | S2  |
| 2. Experimental Section-----         | S2  |
| 3. NMR spectra of the compounds----- | S25 |
| 4. 2D NMR analysis spectra-----      | S76 |
| 5. High resolution mass spectra----- | S79 |
| 6. Crystal Information-----          | S80 |

## 1. General Considerations:

Solvents were all analytical grade and other reagents were purchased from energy chemical and Bide Pharmatech Ltd. All reactions need to be carried out under nitrogen atmosphere.  $^1\text{H}$  NMR spectra were measured on Bruker AVANCE 600 MHz and 400 MHz spectrometers.  $^{13}\text{C}$  NMR spectra were recorded on Bruker 100 MHz spectrometers with complete proton decoupling. Chemical shifts were reported in ppm from tetramethylsilane in the case of MeOH or DMSO as an internal standard. Melting points were measured on glass slides on an SGW X-4 Melting Point Apparatus. Optical rotations were determined on an SGW-1 automatic polarimeter. Mass Spectra (MS) and High resolution mass spectrometry (HRMS) is conducted on FTICR-MS (Ionspec 7.0T) mass spectrometer with electric spray ionization (ESI) manufactured by Ionspec Company in the United States. Thin-layer chromatography (TLC) was performed on precoated plates (Qingdao GF254) with detection by UV light, Puke (china) silica gel (200-300 mesh) was used for column chromatography. Structural assignments were made with additional information from gCOSY, gHSQC, and gHMBC experiments. X-Ray diffraction data were gathered on a Bruker D8 VENTURE diffractometer equipped with Mo-K $\alpha$  radiation ( $\lambda = 0.71073 \text{ \AA}$ ) at 273 K.

## 2. Experimental Section:

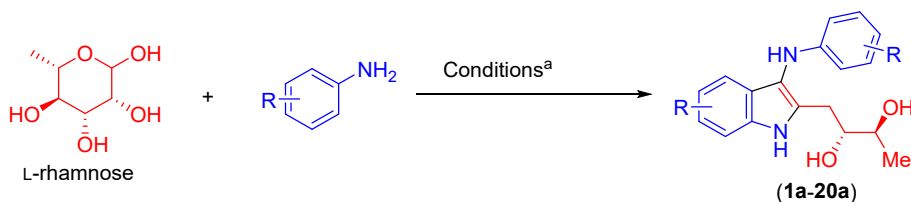

**Scheme S1** Synthesis of the indoles using unprotected L-rhamnose.

General experimental procedure: L-rhamnose (66 mg, 0.4 mmol), aniline (2.5 equiv.) and Sc(OTf)<sub>3</sub> (0.05 equiv.) were added into a 10 mL flask, 2.0 mL acetonitrile as the solvent. Then the solution was stirred at the temperature of 80 °C under air atmosphere for 12h. Upon completion, the mixture was cooled to room temperature. The solvent was evaporated in *vacuo*. The crude product was purified by column chromatography (petroleum ether : ethyl acetate *V/V* = 1 : 1) to give **1a** as a pale white solid with a yield of 78%. Under similar conditions, different aromatic amines were used as starting materials for the reaction, and the corresponding products **2a-20a** were obtained, respectively (Scheme S1).

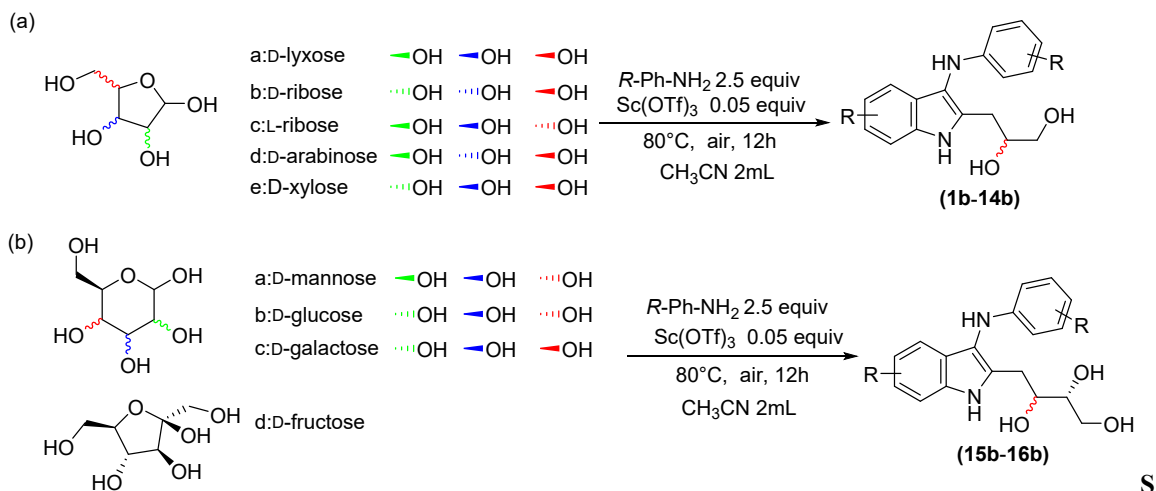

**cheme S2** Synthesis of the indoles using unprotected five-carbons or six-carbons sugars.

General experimental procedure: D-lyxose (60 mg, 0.4 mmol), aromatic amines (2.5 equiv.) and  $\text{Sc}(\text{OTf})_3$  (0.05 equiv.) were added into a 10 mL flask, 2.0 mL acetonitrile as the solvent. Then the solution was stirred at the temperature of  $80^\circ\text{C}$  under air atmosphere for 12 h. Upon completion, the mixture was cooled to room temperature. The solvent was evaporated in *vacuo*. The crude product was purified by column chromatography (petroleum ether : ethyl acetate  $V/V = 1 : 1$ ) to give **1b-8b** as pale yellow solids. Under similar conditions, D/L-ribose(60 mg, 0.4 mmol), D-arabinose(60 mg, 0.4 mmol), and D-xylose(60 mg, 0.4 mmol) with different aromatic amines were used as starting materials for the reaction, and the corresponding products **9b-14b** were obtained, respectively (Scheme S2-a).

D-mannose (72 mg, 0.4 mmol), aromatic amines (2.5 equiv.) and  $\text{Sc}(\text{OTf})_3$  (0.05 equiv.) were added into a 10 mL flask, 2.0 mL acetonitrile as the solvent. Then the solution was stirred at the temperature of  $80^\circ\text{C}$  under air atmosphere for 12 h. Upon completion, the mixture was cooled to room temperature, and the solvent was evaporated in *vacuo*. The crude product was purified by column chromatography (petroleum ether : ethyl acetate  $V/V = 1 : 1$ ) to give **15b** as a pale yellow solid. Under similar conditions, D-glucose(72 mg, 0.4 mmol), D-galactose(72 mg, 0.4 mmol) or D-fructose(72 mg, 0.4 mmol)with different aromatic amines were used as starting materials for the reaction, and the corresponding products **15b** and **16b** were obtained, respectively (Scheme S2-b).

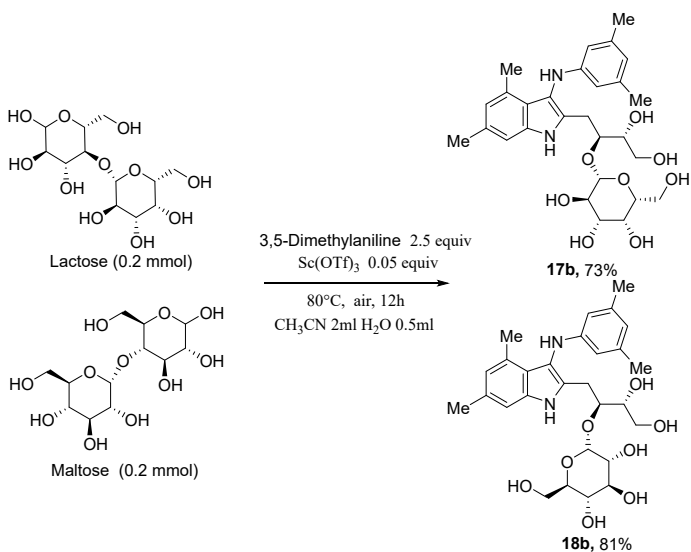

**Scheme S3** Synthesis of the indoles using unprotected disaccharides.

General experimental procedure: Lactose (68 mg, 0.2 mmol), 3,5-dimethylaniline (2.5 equiv.) and Sc(OTf)<sub>3</sub> (0.05 equiv.) were added into a 10 mL flask, 2.5 mL acetonitrile and water (*V:V*=4:1) as the mixed solvent. Then the solution was stirred at the temperature of 80 °C under air atmosphere for 12 h. Upon completion, the mixture was cooled to room temperature, and the solvent was evaporated in *vacuo*. The crude product was purified by column chromatography (dichloromethane : methanol *V/V* = 5 : 1) to give **17b** as a pale yellow solid. Under similar conditions, maltose (68mg, 0.2mmol) with 3,5-dimethylaniline were used as starting materials for the reaction, and the corresponding **18b** product was obtained (Scheme S3).

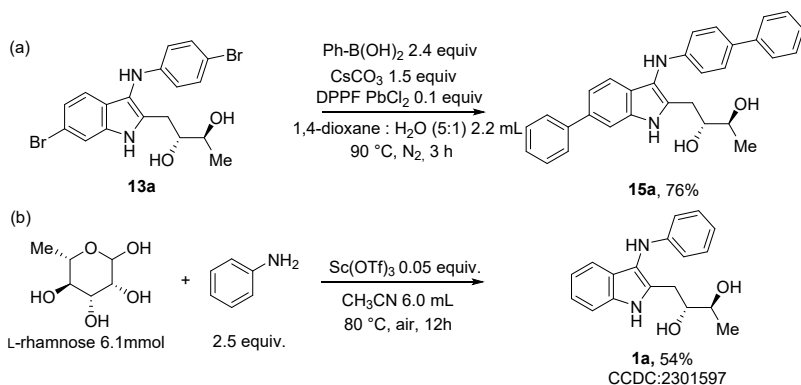

**Scheme S4** Extension experiments.

General experimental procedure: Product **13a** (50 mg, 0.11 mmol), Ph-B(OH)<sub>2</sub> (2.4 equiv.), CsCO<sub>3</sub> (1.5 equiv.) and DPPF PbCl<sub>2</sub> (0.1 equiv.) were added into a 20 mL flask, 2.2 mL 1,4-dioxane : H<sub>2</sub>O (*V:V*=5:1) as the mixed solvent. Then the solution was stirred at the temperature of 90 °C under N<sub>2</sub> atmosphere for 3 h. Upon completion, the mixture was cooled to room temperature, 20 mL methanol was added to dissolve the solid residue, and then the solvent was evaporated in *vacuo*. The crude product was purified by column

chromatography (petroleum ether : ethyl acetate  $V/V = 1 : 1$ ) to give **15a** as a pale yellow solid (SchemeS4-a). General experimental procedure: L-rhamnose (1g, 6.1mmol), aniline (2.5 equiv.) and  $\text{Sc}(\text{OTf})_3$  (0.05 equiv.) were added into a 20 mL flask, 6.0 mL acetonitrile as the solvent. Then the solution was stirred at the temperature of 80 °C under air atmosphere for 12 h. Upon completion, the mixture was cooled to room temperature, and the solvent was evaporated in *vacuo*. The crude product was purified by column chromatography (petroleum ether : ethyl acetate  $V/V = 1 : 1$ ) to give **1a** as a pale white solid with a yield of 54% (SchemeS4-b).

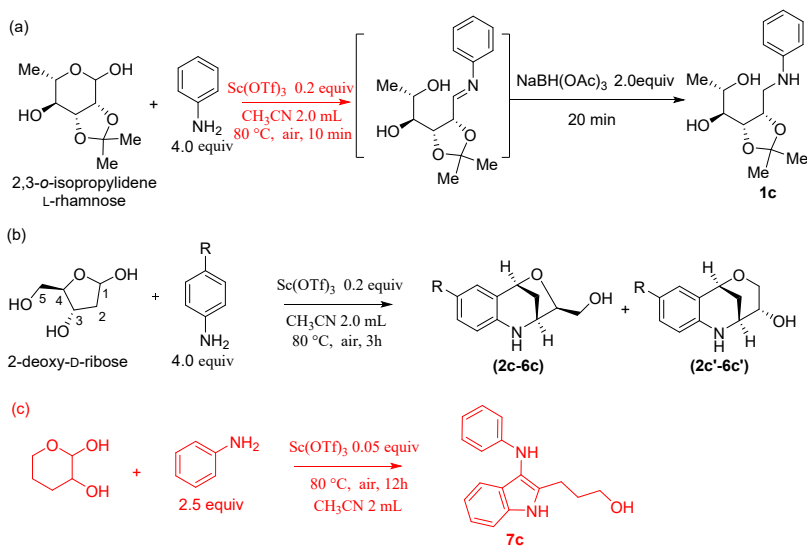

#### Scheme S5 Controlled experiment.

General experimental procedure: 2,3-*O*-Isopropylidene L-rhamnose(88 mg, 0.4mmol), aniline (4.0 equiv.) and  $\text{Sc}(\text{OTf})_3$ (0.2 equiv.) were added into a 10 mL flask, 2.0 mL acetonitrile as the solvent. Then the solution was stirred at the temperature of 80 °C under air atmosphere for 10 minutes, subsequently, 2.0 equiv  $\text{NaBH}(\text{OAc})_3$  was added into the reaction for another 20 minutes. Upon completion, the mixture was cooled to room temperature, and the solvent was evaporated in *vacuo*. The crude product was purified by silica gel column chromatography (petroleum ether : ethyl acetate  $V/V = 1 : 1$ ) to give **1c** as a pale yellow solid (Scheme S5-a).

General experimental procedure:2-Deoxy-D-ribose(55 mg, 0.4 mmol), aniline (4.0 equiv.) and  $\text{Sc}(\text{OTf})_3$ (0.2 equiv.) were added into a 10 mL flask, 2.0 mL acetonitrile as the solvent. Then the solution was stirred at the temperature of 80 °C under air atmosphere for 3h. Upon completion, the mixture was cooled to room temperature, and the solvent was evaporated in *vacuo*. The crude product was purified by column chromatography (petroleum ether : ethyl acetate  $V/V = 3 : 1$ ) to give **2c** and **2c'** as pale yellow solids. Under similar conditions, 2-deoxy-D-ribose and different aromatic amines were used as starting materials for the reaction, and the corresponding products **3c,3c'-6c,6c'** were obtained, respectively (Scheme S5-b).

General experimental procedure: Tetrahydro-2*H*-pyran-2,3-diol (60 mg, 0.5mmol), aniline (2.5 equiv.) and Sc(OTf)<sub>3</sub> (0.05 equiv.) were added into a 10 mL flask, 2.0 mL acetonitrile as the solvent. Then the solution was stirred at the temperature of 80 °C under air atmosphere for 12 h. Upon completion, the mixture was cooled to room temperature, and the solvent was evaporated in *vacuo*. The crude product was purified by column chromatography (petroleum ether : ethyl acetate *V/V* = 1 : 1) to give **7c** (Scheme S5-c).

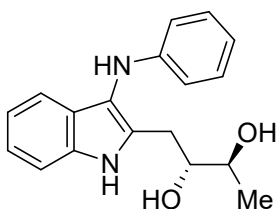

**(2*S*,3*R*)-1-(3-(phenylamino)-1*H*-indol-2-yl)butane-2,3-diol (1a)**. Yellow solid, 90 mg, yield 78%, petroleum ether/ethyl acetate (*V/V*)=1:1, m.p. 102.5 - 103.3 °C. [ $\alpha$ ]<sub>D</sub><sup>25</sup> +10.0 (*c* 0.1, CH<sub>3</sub>OH); <sup>1</sup>H NMR (400 MHz, CD<sub>3</sub>OD)  $\delta$  7.30 (d, *J* = 8.2 Hz, 1H), 7.21 (d, *J* = 7.8 Hz, 1H), 7.07 – 7.00 (m, 3H), 6.91 (d, *J* = 7.2 Hz, 1H), 6.63 – 6.53 (m, 3H), 3.76 (dt, *J* = 8.6, 4.8 Hz, 1H), 3.64 – 3.57 (m, 1H), 3.03 (dd, *J* = 14.8, 4.2 Hz, 1H), 2.80 (dd, *J* = 14.8, 8.4 Hz, 1H), 1.16 (d, *J* = 6.4 Hz, 3H). <sup>13</sup>C NMR (100 MHz, CD<sub>3</sub>OD)  $\delta$  149.0, 134.8, 131.9, 128.5, 125.6, 120.5, 118.2, 117.5, 116.6, 114.8, 113.0, 110.5, 75.1, 70.0, 28.7, 17.1. MS (ESI): Calculated for C<sub>18</sub>H<sub>21</sub>N<sub>2</sub>O<sub>2</sub> ([M+H]<sup>+</sup>): 297.1598, found: 297.1597.

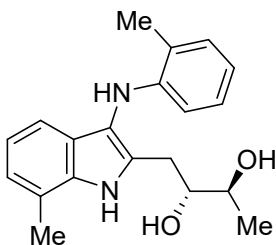

**(2*R*,3*S*)-1-(7-methyl-3-(*o*-tolylamino)-1*H*-indol-2-yl)butane-2,3-diol(2a)**. Yellow solid, 91mg, yield 72%, petroleum ether/ethyl acetate (*V/V*)=1:1, m.p. 100.5 - 101.3 °C. [ $\alpha$ ]<sub>D</sub><sup>25</sup> +9.0 (*c* 0.1, CH<sub>3</sub>OH); <sup>1</sup>H NMR (400 MHz, CD<sub>3</sub>OD)  $\delta$  7.06 (t, *J* = 6.2 Hz, 2H), 6.89 – 6.82 (m, 3H), 6.57 (t, *J* = 7.4 Hz, 1H), 6.36 (d, *J* = 8.2 Hz, 1H), 3.81 (dd, *J* = 8.6, 4.4 Hz, 1H), 3.64 (d, *J* = 7.2 Hz, 1H), 3.05 (dd, *J* = 14.6, 4.2 Hz, 1H), 2.87 (dd, *J* = 14.8, 8.2 Hz, 1H), 2.53 (s, 3H), 2.37 (s, 3H), 1.20 (d, *J* = 6.4 Hz, 3H). <sup>13</sup>C NMR (101 MHz, CD<sub>3</sub>OD)  $\delta$  146.5, 134.0, 131.1, 129.5, 126.2, 125.3, 121.5, 121.1, 119.9, 118.4, 116.6, 115.8, 115.4, 111.7, 75.3, 70.0, 28.8, 17.3, 16.6, 15.3. MS (ESI): Calculated for C<sub>20</sub>H<sub>25</sub>N<sub>2</sub>O<sub>2</sub> ([M+H]<sup>+</sup>): 325.1911, found: 325.1918.

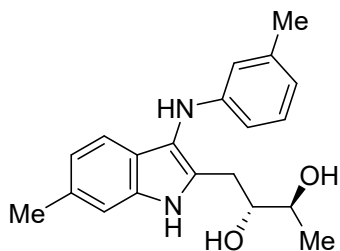

**(2R,3S)-1-(6-methyl-3-(*m*-tolylamino)-1*H*-indol-2-yl)butane-2,3-diol(3a).** Yellow solid, 95 mg, yield 62%, petroleum ether/ethyl acetate (*V/V*)=1:1, m.p. 90.5 - 92.3 °C.  $[\alpha]_{\text{D}}^{25} +18.0$  (*c* 0.1, CH<sub>3</sub>OH); <sup>1</sup>H NMR (400 MHz, CD<sub>3</sub>OD)  $\delta$  7.16 – 7.11 (m, 1H), 6.94 (dd, *J* = 7.8, 5.6 Hz, 2H), 6.67 (d, *J* = 7.2 Hz, 1H), 6.48 – 6.32 (m, 3H), 3.78 (dd, *J* = 8.8, 4.6 Hz, 1H), 3.66 – 3.62 (m, 1H), 3.08 – 2.95 (m, 1H), 2.78 (dd, *J* = 14.8, 8.4 Hz, 1H), 2.42 (d, *J* = 8.8 Hz, 3H), 2.19 (s, 3H), 1.18 (d, *J* = 6.4 Hz, 3H). <sup>13</sup>C NMR (101 MHz, CD<sub>3</sub>OD)  $\delta$  150.5, 138.2, 134.9, 133.0, 128.9, 128.4, 120.5, 119.8, 117.3, 117.2, 113.6, 113.2, 109.9, 108.3, 75.1, 70.0, 47.6, 28.4, 20.4, 17.5, 17.0. MS (ESI): Calculated for C<sub>20</sub>H<sub>25</sub>N<sub>2</sub>O<sub>2</sub> ([M+H]<sup>+</sup>): 325.1911, found: 325.1907.

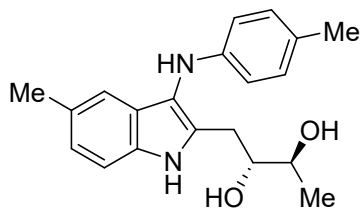

**(2R,3S)-1-(5-methyl-3-(*p*-tolylamino)-1*H*-indol-2-yl)butane-2,3-diol(4a).** Yellow solid, 84 mg, yield 71%, petroleum ether/ethyl acetate (*V/V*)=1:1, m.p. 97.4 - 98.6 °C.  $[\alpha]_{\text{D}}^{25} +16.0$  (*c* 0.1, CH<sub>3</sub>OH); <sup>1</sup>H NMR (400 MHz, CD<sub>3</sub>OD)  $\delta$  7.20 (d, *J* = 8.2 Hz, 1H), 7.03 (s, 1H), 6.89 (dd, *J* = 8.4, 2.4 Hz, 3H), 6.57 – 6.51 (m, 2H), 3.77 (ddd, *J* = 8.2, 5.4, 4.2 Hz, 1H), 3.68 – 3.60 (m, 1H), 3.03 (dd, *J* = 14.8, 4.2 Hz, 1H), 2.81 (dd, *J* = 14.8, 8.2 Hz, 1H), 2.34 (s, 3H), 2.21 (s, 3H), 1.18 (d, *J* = 6.4 Hz, 3H). <sup>13</sup>C NMR (101 MHz, CD<sub>3</sub>OD)  $\delta$  146.7, 133.2, 131.9, 128.9, 127.2, 125.9, 125.7, 122.0, 117.2, 114.8, 113.2, 110.3, 75.1, 70.0, 48.3, 48.1, 47.9, 47.6, 47.4, 47.2, 47.0, 28.8, 20.3, 19.2, 17.1. MS (ESI): Calculated for C<sub>20</sub>H<sub>25</sub>N<sub>2</sub>O<sub>2</sub> ([M+H]<sup>+</sup>): 325.1911, found: 325.1913.

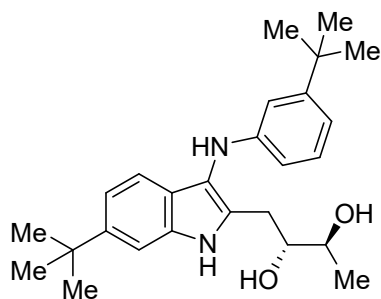

**(2R,3S)-1-(6-(*tert*-butyl)-3-((3-(*tert*-butyl)phenyl)amino)-1*H*-indol-2-yl)butane-2,3-diol(5a).** Yellow solid, 124 mg, yield 72%, petroleum ether/ethyl acetate (*V/V*)=1:1, m.p. 93.7 - 94.3 °C.  $[\alpha]_{\text{D}}^{25} +15.0$  (*c* 0.1, CH<sub>3</sub>OH); <sup>1</sup>H NMR (400 MHz, CD<sub>3</sub>OD)  $\delta$  7.36 (d, *J* = 1.8 Hz, 1H), 7.18 (dd, *J* = 8.4, 1.8 Hz, 1H), 7.05 (d, *J* = 8.4 Hz, 1H), 6.99 (t, *J* = 7.8 Hz, 1H), 6.80 (q, *J* = 2.0 Hz, 1H), 6.69 (d, *J* = 7.8 Hz, 1H), 6.41 (dd, *J* = 7.8,

2.2 Hz, 1H), 3.79 (dt,  $J = 7.8, 4.8$  Hz, 1H), 3.64 (dd,  $J = 6.6, 1.8$  Hz, 1H), 3.04 (ddd,  $J = 14.8, 4.4, 1.8$  Hz, 1H), 2.84 (ddd,  $J = 14.8, 8.2, 1.8$  Hz, 1H), 1.39 (s, 9H), 1.25 (s, 9H), 1.18 (d,  $J = 6.4$  Hz, 3H).  $^{13}\text{C}$  NMR (101 MHz,  $\text{CD}_3\text{OD}$ )  $\delta$  151.5, 148.6, 143.8, 134.9, 130.9, 128.1, 123.2, 117.2, 116.3, 114.8, 113.8, 110.5, 110.3, 106.9, 75.2, 69.9, 34.1, 34.0, 31.0, 30.5, 28.8, 17.1. MS (ESI): Calculated for  $\text{C}_{26}\text{H}_{37}\text{N}_2\text{O}_2$  ( $[\text{M}+\text{H}]^+$ ): 409.2850, found: 409.2851.

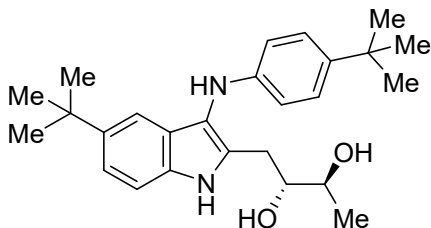

**(2R,3S)-1-(5-(tert-butyl)-3-((4-(tert-butyl)phenyl)amino)-1H-indol-2-yl)butane-2,3-diol (6a).** Yellow solid, 96 mg, yield 58%, petroleum ether/ethyl acetate ( $V/V$ )=1:1, m.p. 93.1 - 94.8 °C.  $[\alpha]_{\text{D}}^{25} +22.0$  ( $c$  0.1,  $\text{CH}_3\text{OH}$ );  $^1\text{H}$  NMR (400 MHz,  $\text{CD}_3\text{OD}$ )  $\delta$  7.29 - 7.24 (m, 2H), 7.19 - 7.12 (m, 3H), 6.64 - 6.57 (m, 2H), 3.81 - 3.76 (m, 1H), 3.63 (d,  $J = 1.7$  Hz, 1H), 3.03 (ddd,  $J = 14.7, 4.2, 1.6$  Hz, 1H), 2.86 - 2.80 (m, 1H), 1.31 (s, 9H), 1.28 (s, 9H), 1.18 (d,  $J = 6.4$  Hz, 3H).  $^{13}\text{C}$  NMR (101 MHz,  $\text{CD}_3\text{OD}$ )  $\delta$  146.6, 141.0, 139.4, 132.9, 131.6, 125.4, 125.2, 118.6, 115.4, 113.4, 112.9, 110.0, 75.1, 70.0, 34.0, 33.3, 31.1, 30.7, 30.3, 28.8, 17.1. MS (ESI): Calculated for  $\text{C}_{26}\text{H}_{37}\text{N}_2\text{O}_2$  ( $[\text{M}+\text{H}]^+$ ): 409.2850, found: 409.2850.

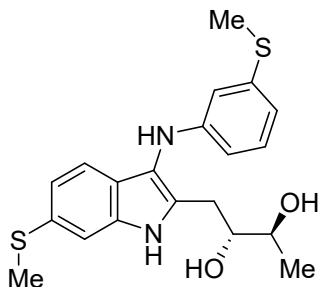

**(2R,3S)-1-(6-(methylthio)-3-((3-(methylthio)phenyl)amino)-1H-indol-2-yl)butane-2,3-diol (7a).** Yellow solid, 107 mg, yield 63%, petroleum ether/ethyl acetate ( $V/V$ )=1:1, m.p. 107.7 - 109.1 °C.  $[\alpha]_{\text{D}}^{25} +12.0$  ( $c$  0.1,  $\text{CH}_3\text{OH}$ );  $^1\text{H}$  NMR (400 MHz,  $\text{CD}_3\text{OD}$ )  $\delta$  7.35 (d,  $J = 1.8$  Hz, 1H), 7.18 (dd,  $J = 8.2, 1.6$  Hz, 1H), 7.04 - 6.94 (m, 2H), 6.54 (dd,  $J = 4.4, 2.2$  Hz, 2H), 6.41 (d,  $J = 8.2$  Hz, 1H), 3.81 - 3.74 (m, 1H), 3.64 - 3.62 (m, 1H), 3.04 (ddd,  $J = 14.8, 4.2, 1.6$  Hz, 1H), 2.86 - 2.75 (m, 1H), 2.51 (s, 3H), 2.36 (s, 3H), 1.19 (d,  $J = 6.4$ , 3H).  $^{13}\text{C}$  NMR (101 MHz,  $\text{CD}_3\text{OD}$ )  $\delta$  150.1, 139.7, 130.0, 133.9, 130.4, 129.7, 124.9, 122.1, 120.7, 118.3, 117.2, 115.6, 111.8, 111.0, 75.8, 70.9, 29.4, 18.0, 17.6, 15.2. MS (ESI): Calculated for  $\text{C}_{20}\text{H}_{25}\text{N}_2\text{O}_2\text{S}_2$  ( $[\text{M}+\text{H}]^+$ ): 389.1352, found: 389.1355.

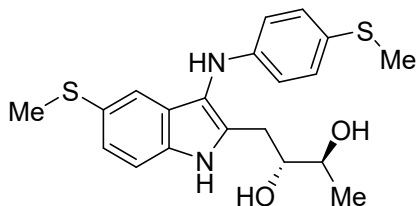



**(2*R*,3*S*)-1-(5-(methylthio)-3-((4-(methylthio)phenyl)amino)-1*H*-indol-2-yl)butane-2,3-diol (8a).** Yellow solid, 93 mg, yield 64%, petroleum ether/ethyl acetate (*V/V*)=1:1, m.p. 106.6 - 107.9 °C.  $[\alpha]_{\text{D}}^{25} +13.0$  (*c* 0.1, CH<sub>3</sub>OH); <sup>1</sup>H NMR (400 MHz, CD<sub>3</sub>OD)  $\delta$  7.29 (d, *J* = 8.4 Hz, 1H), 7.23 (d, *J* = 1.8 Hz, 1H), 7.17 – 7.13 (m, 2H), 7.10 (dd, *J* = 8.4, 1.8 Hz, 1H), 6.59 (d, *J* = 8.6 Hz, 2H), 3.77 (ddd, *J* = 8.4, 5.4, 4.2 Hz, 1H), 3.63 (d, *J* = 5.6 Hz, 1H), 3.04 (dd, *J* = 14.8, 4.2 Hz, 1H), 2.83 – 2.78 (m, 1H), 2.40 (s, 3H), 2.38 (s, 3H), 1.19 (d, *J* = 6.4 Hz, 3H). <sup>13</sup>C NMR (101 MHz, CD<sub>3</sub>OD)  $\delta$  148.0, 133.5, 133.1, 131.2, 126.7, 126.2, 126.1, 123.6, 122.6, 118.2, 114.3, 113.5, 111.2, 75.0, 70.0, 28.6, 18.0, 17.5, 17.2. MS (ESI): Calculated for C<sub>20</sub>H<sub>25</sub>N<sub>2</sub>O<sub>2</sub>S<sub>2</sub> ([M+H]<sup>+</sup>): 389.1352, found: 389.1353.

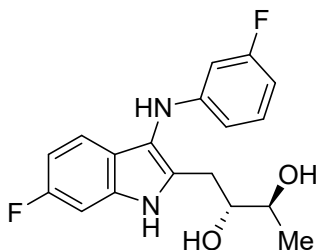

**(2*R*,3*S*)-1-(6-fluoro-3-((3-fluorophenyl)amino)-1*H*-indol-2-yl)butane-2,3-diol (9a).** Yellow solid, 71 mg, yield 49%, petroleum ether/ethyl acetate (*V/V*)=1:1,  $[\alpha]_{\text{D}}^{25} +17.0$  (*c* 0.1, CH<sub>3</sub>OH); m.p. 90.1 - 92.4 °C. <sup>1</sup>H NMR (400 MHz, CD<sub>3</sub>OD)  $\delta$  7.20 – 7.13 (m, 1H), 7.06 – 7.02 (m, 2H), 6.78 – 6.71 (m, 1H), 6.44 (dd, *J* = 8.4, 2.2 Hz, 1H), 6.32 – 6.29 (m, 1H), 6.25 – 6.22 (m, 1H), 3.79 – 3.74 (m, 1H), 3.66 – 3.62 (m, 1H), 3.05 – 3.03 (m, 1H), 2.77 (ddd, *J* = 14.8, 8.6, 2.4 Hz, 1H), 1.20 (d, *J* = 6.4 Hz, 3H). <sup>13</sup>C NMR (101 MHz, CD<sub>3</sub>OD)  $\delta$  165.0, 163.4, 160.4, 158.8, 151.2, 151.1, 134.7, 134.6, 132.8, 132.8, 129.7, 125.4, 122.0, 118.1, 118.0, 114.2, 108.9, 108.8, 106.7, 106.6, 102.7, 102.6, 99.4, 99.2, 96.9, 96.7, 75.0, 70.1, 28.6, 17.2. MS (ESI): Calculated for C<sub>18</sub>H<sub>19</sub>N<sub>2</sub>O<sub>2</sub>F<sub>2</sub> ([M+H]<sup>+</sup>): 333.1409, found: 333.1410.

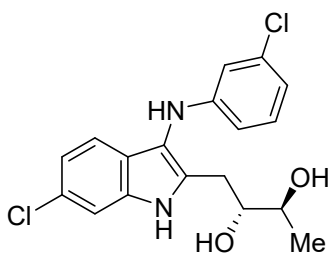

**(2*R*,3*S*)-1-(6-chloro-3-((3-chlorophenyl)amino)-1*H*-indol-2-yl)butane-2,3-diol (10a).** Yellow solid, 95 mg, yield 66%, petroleum ether/ethyl acetate (*V/V*)=1:1, m.p. 94.2 – 96.3 °C.  $[\alpha]_{\text{D}}^{25} +31.0$  (*c* 0.1, CH<sub>3</sub>OH); <sup>1</sup>H NMR (400 MHz, CD<sub>3</sub>OD)  $\delta$  7.29 (d, *J* = 8.0 Hz, 1H), 7.06 – 6.98 (m, 2H), 6.93 (d, *J* = 7.6 Hz, 1H), 6.61 – 6.43 (m, 3H), 3.80 – 3.78 (m, 1H), 3.68 – 3.63 (m, 1H), 3.05 (dd, *J* = 14.8, 4.2 Hz, 1H), 2.76 (dd, *J* = 14.6, 8.8 Hz, 1H), 1.20 (d, *J* = 6.4 Hz, 3H). <sup>13</sup>C NMR (101 MHz, CD<sub>3</sub>OD)  $\delta$  151.8, 136.2, 135.7, 134.3, 129.5, 123.7, 121.2, 119.5, 116.0, 112.4, 111.3, 109.5, 74.8, 70.1, 28.3, 17.2. MS (ESI): Calculated for C<sub>18</sub>H<sub>19</sub>N<sub>2</sub>O<sub>2</sub>Cl<sub>2</sub> ([M+H]<sup>+</sup>): 365.0818, found: 365.0820.

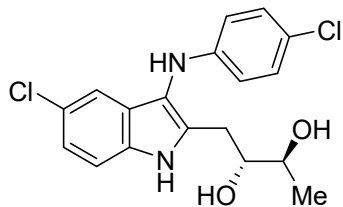

**(2R,3S)-1-(5-chloro-3-((4-chlorophenyl)amino)-1H-indol-2-yl)butane-2,3-diol (11a).** Yellow solid, 75 mg, yield 58%, petroleum ether/ethyl acetate (*V/V*)=1:1, m.p. 97.5 - 98.5 °C.  $[\alpha]_D^{25} +20.0$  (*c* 0.1, CH<sub>3</sub>OH); <sup>1</sup>H NMR (400 MHz, DMSO - *d*<sub>6</sub>) δ 10.98 (s, 1H), 7.36 (d, *J* = 8.6 Hz, 1H), 7.30 (s, 1H), 7.10 – 7.05 (m, 3H), 7.02 (dd, *J* = 8.6, 2.2 Hz, 1H), 6.57 – 6.51 (m, 2H), 4.65 (d, *J* = 5.8 Hz, 2H), 3.72 – 3.43 (m, 2H), 2.94 (dd, *J* = 14.6, 3.8 Hz, 1H), 2.60 (dd, *J* = 14.6, 8.8 Hz, 1H), 1.06 (d, *J* = 6.4 Hz, 3H). <sup>13</sup>C NMR (101 MHz, DMSO - *d*<sub>6</sub>) δ 148.3, 136.2, 133.2, 129.0, 126.5, 123.5, 120.6, 120.0, 116.5, 114.6, 113.7, 113.3, 74.8, 70.1, 29.7, 19.5. MS (ESI): Calculated for C<sub>18</sub>H<sub>19</sub>N<sub>2</sub>O<sub>2</sub>Cl<sub>2</sub> ([M+H]<sup>+</sup>): 365.0818, found: 365.0815.

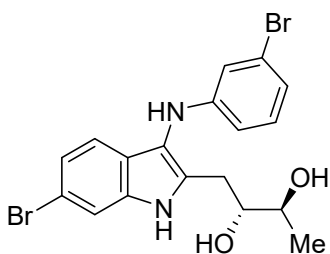

**(2R,3S)-1-(6-bromo-3-((3-bromophenyl)amino)-1H-indol-2-yl)butane-2,3-diol (12a).** Yellow solid, 126 mg, yield 67%, petroleum ether/ethyl acetate (*V/V*)=1:1, m.p. 100.1 - 102.3 °C.  $[\alpha]_D^{25} +19.0$  (*c* 0.1, CH<sub>3</sub>OH); <sup>1</sup>H NMR (400 MHz, CD<sub>3</sub>OD) δ 7.35 (d, *J* = 8.0 Hz, 1H), 7.15 – 7.10 (m, 1H), 6.99 – 6.93 (m, 2H), 6.74 – 6.70 (m, 1H), 6.63 (d, *J* = 2.2 Hz, 1H), 6.48 (dd, *J* = 8.2, 2.2 Hz, 1H), 3.79 – 3.77 (m, 1H), 3.66 – 3.64 (m, 1H), 3.04 (ddd, *J* = 14.6, 4.0, 2.8 Hz, 1H), 2.80 – 2.71 (m, 1H), 1.19 (d, *J* = 6.4 Hz, 3H). <sup>13</sup>C NMR (101 MHz, CD<sub>3</sub>OD) δ 151.9, 136.1, 129.9, 123.6, 122.9, 122.5, 121.6, 119.2, 118.9, 115.4, 113.6, 113.4, 111.7, 110.1, 74.8, 70.2, 28.3, 17.2. MS (ESI): Calculated for C<sub>18</sub>H<sub>19</sub>N<sub>2</sub>O<sub>2</sub>Br<sub>2</sub> ([M+H]<sup>+</sup>): 452.9808, found: 452.9810.

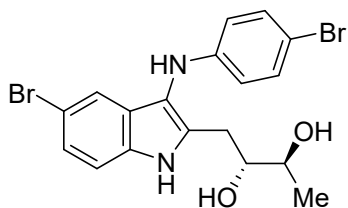

**(2R,3S)-1-(5-bromo-3-((4-bromophenyl)amino)-1H-indol-2-yl)butane-2,3-diol (13a).** Yellow solid, 113 mg, yield 64%, petroleum ether/ethyl acetate (*V/V*)=1:1, m.p. 108.7 - 109.3 °C.  $[\alpha]_D^{25} +15.0$  (*c* 0.1, CH<sub>3</sub>OH); <sup>1</sup>H NMR (400 MHz, CD<sub>3</sub>OD) δ 7.32 (d, *J* = 1.8 Hz, 1H), 7.26 (d, *J* = 8.6 Hz, 1H), 7.19 – 7.16 (m, 2H), 7.16 – 7.12 (m, 1H), 6.56 – 6.47 (m, 2H), 3.76 (ddd, *J* = 8.8, 5.4, 4.0 Hz, 1H), 3.67 – 3.58 (m, 1H), 3.04 (dd, *J* = 14.8, 4.0 Hz, 1H), 2.79 (dd, *J* = 14.8, 8.8 Hz, 1H), 1.20 (d, *J* = 6.4 Hz, 3H). <sup>13</sup>C NMR (101 MHz, CD<sub>3</sub>OD) δ 148.0, 134.3, 133.4, 131.3, 127.1, 123.2, 119.7, 114.5, 113.8, 112.4, 111.6, 107.9, 74.9, 70.1, 47.7, 28.6, 17.2. MS (ESI): Calculated for C<sub>18</sub>H<sub>19</sub>N<sub>2</sub>O<sub>2</sub>Br<sub>2</sub> ([M+H]<sup>+</sup>): 452.9808, found: 452.9809.

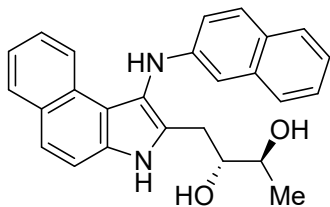

**(2R,3S)-1-(1-(naphthalen-2-ylamino)-3H-benzo[e]indol-2-yl)butane-2,3-diol (14a).** Yellow solid, 107 mg, yield 60%, petroleum ether/ethyl acetate (*V/V*)=1:1, m.p. 99.5 - 100.3 °C.  $[\alpha]_{\text{D}}^{25} +34.0$  (*c* 0.1, CH<sub>3</sub>OH); <sup>1</sup>H NMR (400 MHz, CD<sub>3</sub>OD)  $\delta$  8.41 (dd, *J* = 7.8, 1.8 Hz, 1H), 7.82 (dd, *J* = 7.6, 1.8 Hz, 1H), 7.62 (dd, *J* = 8.6, 4.6 Hz, 2H), 7.60 – 7.50 (m, 2H), 7.29 (d, *J* = 8.2 Hz, 1H), 7.22 (td, *J* = 7.6, 1.6 Hz, 2H), 7.19 – 7.11 (m, 2H), 7.08 (ddd, *J* = 8.0, 6.8, 1.4 Hz, 1H), 6.69 (d, *J* = 2.4 Hz, 1H), 3.83 (dt, *J* = 8.8, 4.6 Hz, 1H), 3.71 – 3.61 (m, 1H), 3.14 (dd, *J* = 14.8, 4.2 Hz, 1H), 2.89 (dd, *J* = 14.8, 8.6 Hz, 1H), 1.17 (d, *J* = 6.4 Hz, 3H). <sup>13</sup>C NMR (101 MHz, CD<sub>3</sub>OD)  $\delta$  146.9, 135.5, 131.1, 131.0, 129.5, 128.5, 128.0, 127.7, 127.7, 127.2, 125.5, 125.4, 124.6, 123.4, 122.2, 121.5, 121.1, 118.9, 117.2, 116.8, 112.9, 105.4, 75.3, 70.1, 47.7, 28.4, 17.1. MS (ESI): Calculated for C<sub>26</sub>H<sub>25</sub>N<sub>2</sub>O<sub>2</sub> ( $[M+H]^+$ ): 397.1911, found: 397.1910.

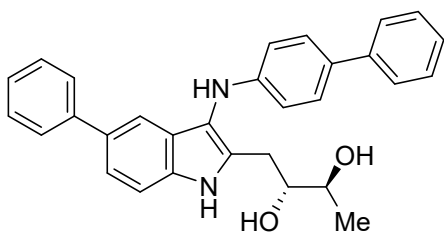

**(2R,3S)-1-(3-([1,1'-biphenyl]-4-ylamino)-5-phenyl-1H-indol-2-yl)butane-2,3-diol (15a).** Yellow solid, 106 mg, yield 63%, petroleum ether/ethyl acetate (*V/V*)=1:1, m.p. 112.7 - 113.1 °C.  $[\alpha]_{\text{D}}^{25} +17.0$  (*c* 0.1, CH<sub>3</sub>OH); <sup>1</sup>H NMR (400 MHz, CDCl<sub>3</sub>)  $\delta$  7.57 – 7.52 (m, 3H), 7.48 (d, *J* = 7.8 Hz, 2H), 7.40 – 7.32 (m, 8H), 7.20 (q, *J* = 7.0 Hz, 2H), 6.71 (d, *J* = 8.2 Hz, 2H), 3.70 – 3.60 (m, 2H), 2.96 (dd, *J* = 14.8, 3.4 Hz, 1H), 2.82 (dd, *J* = 14.8, 8.6 Hz, 1H), 1.15 (d, *J* = 6.4 Hz, 3H). <sup>13</sup>C NMR (101 MHz, CDCl<sub>3</sub>)  $\delta$  151.5, 146.2, 145.0, 137.7, 136.9, 136.4, 134.1, 132.3, 132.2, 131.5, 131.0, 129.9, 129.7, 124.8, 120.1, 118.5, 117.3, 115.0, 78.7, 73.8, 31.9, 21.3. MS (ESI): Calculated for C<sub>30</sub>H<sub>29</sub>N<sub>2</sub>O<sub>2</sub> ( $[M+H]^+$ ): 449.2224, found: 449.2228.

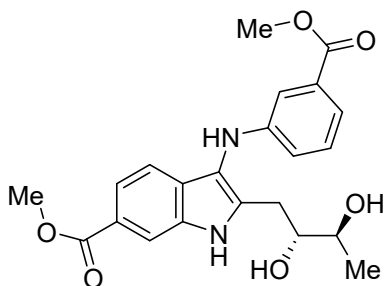

**methyl 2-((2R,3S)-2,3-dihydroxybutyl)-3-((3-(methoxycarbonyl)phenyl)amino)-1H-indole-6-carboxylate (16a).** Yellow solid, 100 mg, yield 54%, petroleum ether/ethyl acetate (*V/V*)=1:1, m.p. 95.2 - 96.8 °C.  $[\alpha]_{\text{D}}^{25} +27.0$  (*c* 0.1, CH<sub>3</sub>OH); <sup>1</sup>H NMR (400 MHz, DMSO - *d*<sub>6</sub>, D<sub>2</sub>O)  $\delta$  7.61 (d, *J* = 8.0 Hz, 1H),

7.37 (d,  $J = 7.4$  Hz, 1H), 7.17 – 7.08 (m, 3H), 7.01 (s, 1H), 6.70 – 6.68 (m, 1H), 3.75 (s, 3H), 3.62 (d,  $J = 4.4$  Hz, 1H), 3.49 (s, 3H), 3.46 – 3.40 (m, 1H), 2.93 (dd,  $J = 14.6, 3.8$  Hz, 1H), 2.61 (dd,  $J = 14.6, 9.0$  Hz, 1H), 1.03 (d,  $J = 6.4$  Hz, 3H).  $^{13}\text{C}$  NMR (101 MHz, DMSO- $d_6$ )  $\delta$  168.8, 167.3, 150.3, 138.2, 135.9, 130.5, 129.4, 122.3, 121.9, 119.8, 117.7, 117.2, 116.0, 113.3, 79.7, 74.7, 70.2, 52.3, 29.7, 19.5. MS (ESI): Calculated for  $\text{C}_{22}\text{H}_{25}\text{N}_2\text{O}_6$  ( $[\text{M}+\text{H}]^+$ ): 413.1707, found: 413.1705.

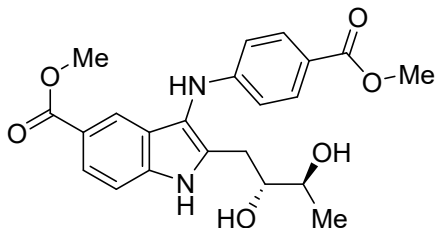

**methyl 2-((2R,3S)-2,3-dihydroxybutyl)-3-((4-(methoxycarbonyl)phenyl)amino)-1H-indole-5-**

**carboxylate (17a).** Yellow solid, 91 mg, yield 51%, petroleum ether/ethyl acetate ( $V/V$ )=1:2, m.p. 106.4 - 108.3 °C.  $[\alpha]_{\text{D}}^{25} +17.0$  ( $c$  0.1,  $\text{CH}_3\text{OH}$ );  $^1\text{H}$  NMR (400 MHz,  $\text{CD}_3\text{OD}$ )  $\delta$  8.00 (d,  $J = 1.6$  Hz, 1H), 7.82 – 7.76 (m, 3H), 7.42 (d,  $J = 8.6$  Hz, 1H), 6.64 (d,  $J = 8.6$  Hz, 2H), 3.86 (s, 3H), 3.84 (s, 3H), 3.78 (ddd,  $J = 9.0, 5.4, 4.0$  Hz, 1H), 3.68 – 3.63 (m, 1H), 3.07 (dd,  $J = 14.8, 3.8$  Hz, 1H), 2.81 (dd,  $J = 14.8, 8.8$  Hz, 1H), 1.20 (d,  $J = 6.4$  Hz, 3H).  $^{13}\text{C}$  NMR (101 MHz,  $\text{CD}_3\text{OD}$ )  $\delta$  168.7, 167.9, 153.4, 137.5, 134.7, 131.1, 124.8, 122.1, 120.4, 120.1, 117.4, 114.4, 111.8, 110.6, 74.8, 70.1, 50.9, 50.6, 28.6, 17.3. MS (ESI): Calculated for  $\text{C}_{22}\text{H}_{25}\text{N}_2\text{O}_6$  ( $[\text{M}+\text{H}]^+$ ): 413.1707, found: 413.1702.

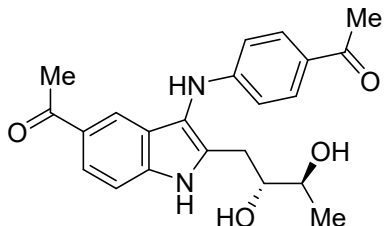

**1-(4-((5-acetyl-2-((2R,3S)-2,3-dihydroxybutyl)-1H-indol-3-yl)amino)phenyl)ethan-1-one (18a).** Yellow solid, 87 mg, yield 66%, petroleum ether/ethyl acetate ( $V/V$ )=1:2, m.p. 102.5 - 103.3 °C.  $[\alpha]_{\text{D}}^{25} +23.0$  ( $c$  0.1,  $\text{CH}_3\text{OH}$ );  $^1\text{H}$  NMR (400 MHz,  $\text{CD}_3\text{OD}$ )  $\delta$  7.98 (d,  $J = 1.8$  Hz, 1H), 7.81 (dd,  $J = 8.8, 1.8$  Hz, 3H), 7.44 (d,  $J = 8.6$  Hz, 1H), 6.67 (d,  $J = 8.6$  Hz, 2H), 3.78 (ddd,  $J = 9.0, 5.4, 3.8$  Hz, 1H), 3.66 – 3.63 (m, 1H), 3.07 (dd,  $J = 14.8, 3.8$  Hz, 1H), 2.81 (dd,  $J = 14.8, 8.8$  Hz, 1H), 2.57 (s, 3H), 2.48 (s, 3H), 1.20 (d,  $J = 6.4$  Hz, 3H).  $^{13}\text{C}$  NMR (101 MHz,  $\text{CD}_3\text{OD}$ )  $\delta$  199.7, 197.9, 153.7, 137.7, 134.9, 130.7, 128.6, 126.0, 124.7, 121.4, 119.6, 114.6, 111.9, 110.9, 74.8, 70.1, 28.6, 25.3, 24.6, 17.3. MS (ESI): Calculated for  $\text{C}_{22}\text{H}_{25}\text{N}_2\text{O}_4$  ( $[\text{M}+\text{H}]^+$ ): 381.1809, found: 381.1809.

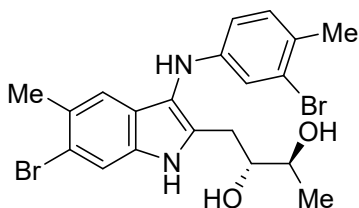

**(2*R*,3*S*)-1-(6-bromo-3-((3-bromo-4-methylphenyl)amino)-5-methyl-1*H*-indol-2-yl)butane-2,3-diol**

**(19a).** Yellow solid, 147 mg, yield 78%, petroleum ether/ethyl acetate (*V/V*)=1:1, m.p. 98.9 - 101.5 °C.  $[\alpha]_{\text{D}}^{25} +12.0$  (*c* 0.1, CH<sub>3</sub>OH); <sup>1</sup>H NMR (400 MHz, CD<sub>3</sub>OD)  $\delta$  7.23 (d, *J* = 8.2 Hz, 1H), 6.98 (dd, *J* = 13.9, 8.2 Hz, 2H), 6.67 (d, *J* = 2.4 Hz, 1H), 6.42 (dd, *J* = 8.2, 2.4 Hz, 1H), 3.79 (dt, *J* = 8.9, 4.5 Hz, 1H), 3.68 – 3.63 (m, 1H), 3.03 (dd, *J* = 14.7, 4.1 Hz, 1H), 2.74 (dd, *J* = 14.7, 8.7 Hz, 1H), 2.41 (s, 3H), 2.24 (s, 3H), 1.19 (d, *J* = 6.4 Hz, 3H). <sup>13</sup>C NMR (101 MHz, CD<sub>3</sub>OD)  $\delta$  149.8, 135.9, 134.5, 130.4, 127.7, 124.6, 124.4, 124.0, 123.4, 116.2, 113.7, 112.9, 112.4, 109.8, 74.8, 70.1, 28.4, 21.1, 20.4, 17.1. MS (ESI): Calculated for C<sub>20</sub>H<sub>23</sub>N<sub>2</sub>O<sub>2</sub>Br<sub>2</sub> ([M+H]<sup>+</sup>): 481.0121, found: 481.0124.

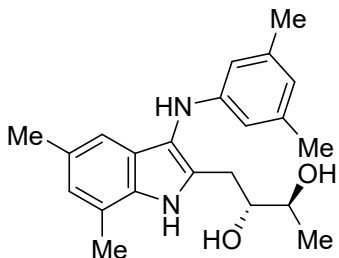

**(2*R*,3*S*)-1-(3-((3,5-dimethylphenyl)amino)-5,7-dimethyl-1*H*-indol-2-yl)butane-2,3-diol** (20a).

Yellow solid, 115 mg, yield 85%, petroleum ether/ethyl acetate (*V/V*)=1:1, m.p. 106.5 - 108.2 °C.  $[\alpha]_{\text{D}}^{25} +15.0$  (*c* 0.1, CH<sub>3</sub>OH); <sup>1</sup>H NMR (400 MHz, CDCl<sub>3</sub>)  $\delta$  8.56 (s, 1H), 6.94 (s, 1H), 6.67 (s, 1H), 6.38 (s, 1H), 6.19 (s, 2H), 5.04 (s, 1H), 3.71 (ddd, *J* = 10.8, 7.4, 4.2 Hz, 2H), 2.84 (dd, *J* = 15.2, 2.8 Hz, 1H), 2.74 (dd, *J* = 15.2, 8.2 Hz, 1H), 2.42 (d, *J* = 3.0 Hz, 6H), 2.17 (s, 6H), 1.14 (d, *J* = 6.4 Hz, 3H). <sup>13</sup>C NMR (101 MHz, CDCl<sub>3</sub>)  $\delta$  149.4, 139.0, 135.1, 132.5, 131.6, 129.4, 123.0, 122.6, 120.0, 115.2, 111.2, 108.7, 77.1, 75.0, 70.2, 27.4, 21.6, 21.5, 18.7, 17.7. MS (ESI): Calculated for C<sub>22</sub>H<sub>24</sub>N<sub>2</sub>O<sub>2</sub> ([M+H]<sup>+</sup>): 353.2224, found: 353.2227.

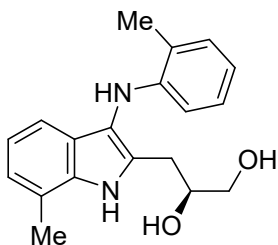

**(*S*)-3-(7-methyl-3-(*o*-tolylamino)-1*H*-indol-2-yl)propane-1,2-diol** (1b).

Yellow solid, 84 mg, yield 67%, petroleum ether/ethyl acetate (*V/V*)=1:1, m.p. 105.2 - 106.7 °C.  $[\alpha]_{\text{D}}^{25} -9.0$  (*c* 0.1, CH<sub>3</sub>OH); <sup>1</sup>H NMR (400 MHz, CD<sub>3</sub>OD)  $\delta$  7.05 – 7.00 (m, 2H), 6.91 – 6.76 (m, 3H), 6.55 – 6.53 (m, 1H), 6.33 (dd, *J* = 8.0, 1.2 Hz, 1H), 4.03 – 3.94 (m, 1H), 3.52 (dd, *J* = 11.2, 4.4 Hz, 1H), 3.43 (dd, *J* = 11.4, 6.0 Hz, 1H), 2.96 (dd, *J* = 14.4, 5.8 Hz, 1H), 2.87 (dd, *J* = 14.6, 7.2 Hz, 1H), 2.50 (s, 3H), 2.33 (s, 3H). <sup>13</sup>C NMR (101 MHz, CD<sub>3</sub>OD)  $\delta$  146.5, 134.0, 130.5, 129.6, 126.2, 125.3, 121.5, 121.2, 120.0, 118.5, 116.6, 115.8, 115.5, 111.7, 71.7, 65.3, 29.3, 16.7, 15.4. MS (ESI): Calculated for C<sub>19</sub>H<sub>23</sub>N<sub>2</sub>O<sub>2</sub> ([M+H]<sup>+</sup>): 311.1754, found: 311.1758.

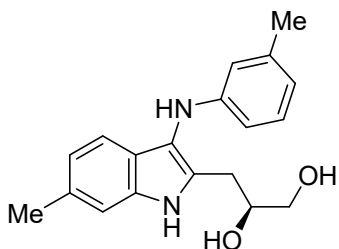

**(S)-3-(6-methyl-3-(*m*-tolylamino)-1*H*-indol-2-yl)propane-1,2-diol (2b).** Yellow solid, 94 mg, yield 73%, petroleum ether/ethyl acetate (*V/V*)=1:1, m.p. 100.0 - 100.9 °C.  $[\alpha]_{\text{D}}^{25}$  -14.0 (*c* 0.1, CH<sub>3</sub>OH); <sup>1</sup>H NMR (400 MHz, CD<sub>3</sub>OD)  $\delta$  7.15 (d, *J* = 8.2 Hz, 1H), 6.95 – 6.93 (m, 2H), 6.68 (d, *J* = 7.2 Hz, 1H), 6.43 (d, *J* = 7.6 Hz, 1H), 6.37 (d, *J* = 2.6 Hz, 1H), 6.35 – 6.29 (m, 1H), 3.98 – 3.96 (m, 1H), 3.53 (dd, *J* = 11.4, 4.2 Hz, 1H), 3.45 (dd, *J* = 11.4, 6.4 Hz, 1H), 2.92 (dd, *J* = 14.4, 6.0 Hz, 1H), 2.83 (dd, *J* = 14.6, 7.4 Hz, 1H), 2.40 (s, 3H), 2.19 (s, 3H). <sup>13</sup>C NMR (101 MHz, CD<sub>3</sub>OD)  $\delta$  150.5, 138.2, 134.9, 132.4, 129.1, 128.9, 128.4, 124.9, 120.6, 119.9, 117.1, 113.1, 109.9, 108.3, 71.6, 65.5, 47.7, 29.4, 29.1, 20.4, 17.4. MS (ESI): Calculated for C<sub>19</sub>H<sub>23</sub>N<sub>2</sub>O<sub>2</sub> ([M+H]<sup>+</sup>): 311.1754, found: 311.1754.

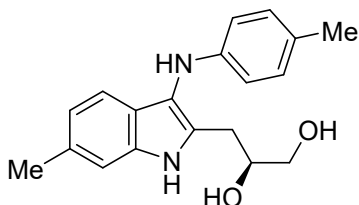

**(S)-3-(6-methyl-3-(*p*-tolylamino)-1*H*-indol-2-yl)propane-1,2-diol (3b).** Yellow solid, 78 mg, yield 59%, petroleum ether/ethyl acetate (*V/V*)=1:1, m.p. 97.6 - 98.8 °C.  $[\alpha]_{\text{D}}^{25}$  -13.0 (*c* 0.1, CH<sub>3</sub>OH); <sup>1</sup>H NMR (400 MHz, CD<sub>3</sub>OD)  $\delta$  7.22 – 7.16 (m, 1H), 7.02 (s, 1H), 6.89 (d, *J* = 7.4 Hz, 3H), 6.61 – 6.46 (m, 2H), 3.96 (p, *J* = 6.2 Hz, 1H), 3.55 – 3.40 (m, 2H), 2.99 – 2.74 (m, 2H), 2.34 (s, 3H), 2.21 (s, 3H). <sup>13</sup>C NMR (101 MHz, CD<sub>3</sub>OD)  $\delta$  146.7, 133.1, 131.3, 129.7, 128.9, 127.3, 125.8, 125.6, 122.1, 117.2, 114.9, 113.1, 110.3, 71.6, 65.4, 47.6, 29.4, 20.3, 19.2. MS (ESI): Calculated for C<sub>19</sub>H<sub>23</sub>N<sub>2</sub>O<sub>2</sub> ([M+H]<sup>+</sup>): 311.1754, found: 311.1752.

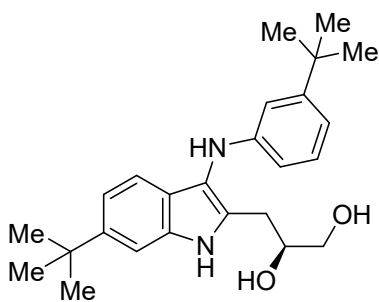

**(S)-3-(6-(*tert*-butyl)-3-((3-(*tert*-butyl)phenyl)amino)-1*H*-indol-2-yl)propane-1,2-diol (4b).** Yellow solid, 113 mg, yield 74%, petroleum ether/ethyl acetate (*V/V*)=1:1, m.p. 97.5 - 99.8 °C.  $[\alpha]_{\text{D}}^{25}$  -11.0 (*c* 0.1, CH<sub>3</sub>OH); <sup>1</sup>H NMR (400 MHz, CD<sub>3</sub>OD)  $\delta$  7.35 (d, *J* = 1.6 Hz, 1H), 7.18 (d, *J* = 8.4 Hz, 1H), 7.05 (dt, *J* = 8.6, 1.4 Hz, 1H), 6.99 (t, *J* = 7.8 Hz, 1H), 6.81 – 6.79 (m, 1H), 6.68 (ddd, *J* = 7.8, 1.8, 1.0 Hz, 1H), 6.39 (ddd, *J* = 8.0, 2.2, 1.2 Hz, 1H), 3.99 – 3.97 (m, 1H), 3.54 (dd, *J* = 11.4, 4.4 Hz, 1H), 3.46 (dd, *J* = 11.4, 6.2 Hz, 1H), 2.96 (dd, *J* = 14.6, 5.8 Hz, 1H), 2.88 (dd, *J* = 14.6, 7.2 Hz, 1H), 1.39 (s, 9H), 1.26 (s, 9H). <sup>13</sup>C NMR (101 MHz,

CD<sub>3</sub>OD)  $\delta$  151.5, 148.6, 143.9, 135.0, 130.3, 128.1, 123.2, 117.3, 116.4, 114.8, 113.8, 110.5, 110.1, 106.9, 71.7, 65.4, 47.7, 34.1, 34.0, 31.0, 30.5, 29.4. MS (ESI): Calculated for C<sub>25</sub>H<sub>35</sub>N<sub>2</sub>O<sub>2</sub> ([M+H]<sup>+</sup>): 395.2693, found: 395.2689.

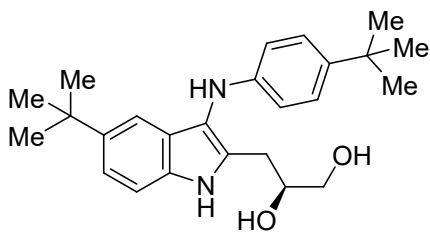

**(S)-3-(5-(*tert*-butyl)-3-((4-(*tert*-butyl)phenyl)amino)-1*H*-indol-2-yl)propane-1,2-diol (5b).** Yellow solid, 83 mg, yield 57%, petroleum ether/ethyl acetate (*V/V*)=1:1, m.p. 97.5 - 98.5 °C. [ $\alpha$ ]<sub>D</sub><sup>25</sup> -14.0 (*c* 0.1, CH<sub>3</sub>OH); <sup>1</sup>H NMR (400 MHz, CD<sub>3</sub>OD)  $\delta$  7.37 – 7.31 (m, 2H), 7.27 – 7.21 (m, 3H), 6.71 – 6.63 (m, 2H), 4.12 – 4.00 (m, 1H), 3.61 (dd, *J* = 11.4, 4.2 Hz, 1H), 3.53 (dd, *J* = 11.4, 6.2 Hz, 1H), 3.03 (dd, *J* = 14.6, 5.8 Hz, 1H), 2.97 – 2.87 (m, 1H), 1.39 (s, 9H), 1.36 (s, 9H). <sup>13</sup>C NMR (101 MHz, CD<sub>3</sub>OD)  $\delta$  146.6, 141.1, 139.4, 133.0, 131.1, 126.3, 125.5, 125.3, 118.8, 115.5, 113.5, 112.9, 110.1, 71.7, 65.5, 47.7, 34.0, 33.4, 31.2, 30.8, 29.5. MS (ESI): Calculated for C<sub>19</sub>H<sub>23</sub>N<sub>2</sub>O<sub>2</sub> ([M+H]<sup>+</sup>): 395.2693, found: 395.2694.

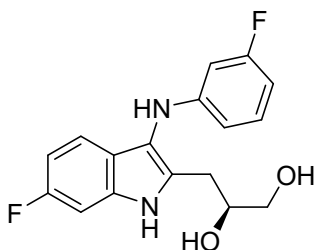

**(S)-3-(6-fluoro-3-((3-fluorophenyl)amino)-1*H*-indol-2-yl)propane-1,2-diol (6b).** Yellow solid, 76 mg, yield 52%, petroleum ether/ethyl acetate (*V/V*)=1:1, m.p. 95.5 - 96.7 °C. [ $\alpha$ ]<sub>D</sub><sup>25</sup> -20.0 (*c* 0.1, CH<sub>3</sub>OH); <sup>1</sup>H NMR (400 MHz, CD<sub>3</sub>OD)  $\delta$  7.21 – 7.13 (m, 1H), 7.08 – 6.96 (m, 2H), 6.77 – 6.74 (m, 1H), 6.43 (dd, *J* = 8.2, 2.2 Hz, 1H), 6.32 – 6.30 (m, 1H), 6.26 – 6.18 (m, 1H), 4.01 – 3.92 (m, 1H), 3.57 – 3.42 (m, 2H), 3.00 – 2.78 (m, 2H). <sup>13</sup>C NMR (101 MHz, CD<sub>3</sub>OD)  $\delta$  165.4, 163.0, 160.8, 158.4, 151.2, 151.1, 132.1, 129.8, 129.7, 121.9, 118.1, 118.0, 114.2, 108.7, 107.0, 106.8, 106.6, 103.8, 103.6, 102.6, 102.4, 99.3, 99.0, 96.9, 96.7, 71.4, 65.5, 29.3. MS (ESI): Calculated for C<sub>17</sub>H<sub>17</sub>N<sub>2</sub>O<sub>2</sub>F<sub>2</sub> ([M+H]<sup>+</sup>): 319.1253, found: 319.1255.

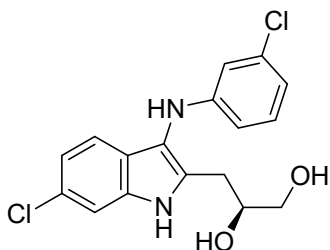

**(S)-3-(6-chloro-3-((3-chlorophenyl)amino)-1*H*-indol-2-yl)propane-1,2-diol (7b).** Yellow solid, 80 mg, yield 51%, petroleum ether/ethyl acetate (*V/V*)=1:1, m.p. 104.4 - 105.4 °C. [ $\alpha$ ]<sub>D</sub><sup>25</sup> -19.0 (*c* 0.1, CH<sub>3</sub>OH); <sup>1</sup>H NMR (400 MHz, CD<sub>3</sub>OD)  $\delta$  7.39 – 7.25 (m, 1H), 7.02 (t, *J* = 8.2, 2H), 6.94 (t, *J* = 8.2 Hz, 1H), 6.61 – 6.43

(m, 3H), 4.04 – 3.92 (m, 1H), 3.59 – 3.51 (m, 1H), 3.51 – 3.43 (m, 1H), 2.95 (dd,  $J = 14.6, 5.6$  Hz, 1H), 2.83 (dd,  $J = 14.6, 7.6$  Hz, 1H).  $^{13}\text{C}$  NMR (101 MHz,  $\text{CD}_3\text{OD}$ )  $\delta$  151.8, 136.2, 135.0, 134.4, 134.3, 129.6, 123.9, 123.8, 121.3, 119.6, 118.3, 116.0, 112.3, 111.2, 109.6, 71.3, 65.6, 29.1. MS (ESI): Calculated for  $\text{C}_{17}\text{H}_{17}\text{N}_2\text{O}_2\text{Cl}_2$  ( $[\text{M}+\text{H}]^+$ ): 351.0662, found: 351.0667.

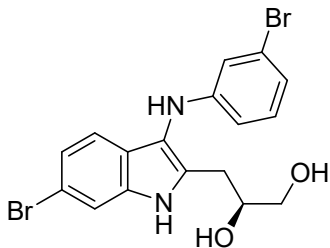

**(S)-3-(6-bromo-3-((3-bromophenyl)amino)-1H-indol-2-yl)propane-1,2-diol (8b).** Yellow solid, 96 mg, yield 60%, petroleum ether/ethyl acetate ( $V/V$ )=1:1, m.p. 103.3 - 104.7 °C.  $[\alpha]_{\text{D}}^{25}$  -23.0 ( $c$  0.1,  $\text{CH}_3\text{OH}$ );  $^1\text{H}$  NMR (400 MHz,  $\text{CD}_3\text{OD}$ )  $\delta$  7.35 (d,  $J = 8.0$  Hz, 1H), 7.13 (d,  $J = 7.6$  Hz, 1H), 6.97 – 6.95 (m, 2H), 6.71 (dd,  $J = 7.8, 1.8$  Hz, 1H), 6.62 (t,  $J = 2.2$  Hz, 1H), 6.47 (dd,  $J = 8.4, 2.2$  Hz, 1H), 4.03 – 3.93 (m, 1H), 3.58 – 3.43 (m, 2H), 2.99 – 2.76 (m, 2H).  $^{13}\text{C}$  NMR (101 MHz,  $\text{CD}_3\text{OD}$ )  $\delta$  151.9, 135.5, 129.8, 123.6, 122.9, 122.5, 121.7, 119.1, 118.9, 115.3, 113.6, 111.6, 111.1, 110.1, 71.2, 65.5, 29.1. MS (ESI): Calculated for  $\text{C}_{17}\text{H}_{17}\text{N}_2\text{O}_2\text{Br}_2$  ( $[\text{M}+\text{H}]^+$ ): 438.9651, found: 438.9648.

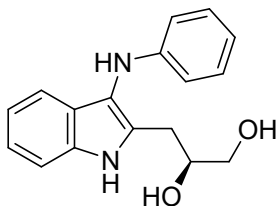

**(S)-3-(3-(phenylamino)-1H-indol-2-yl)propane-1,2-diol (9b).** Yellow solid, 81 mg, yield 72%, petroleum ether/ethyl acetate ( $V/V$ )=1:1, m.p. 107.5 - 108.5 °C.  $[\alpha]_{\text{D}}^{25}$  -16.0 ( $c$  0.1,  $\text{CH}_3\text{OH}$ );  $^1\text{H}$  NMR (400 MHz,  $\text{CD}_3\text{OD}$ )  $\delta$  7.29 (d,  $J = 8.0$  Hz, 1H), 7.06 – 6.98 (m, 2H), 6.93 (d,  $J = 7.6$  Hz, 1H), 6.61 – 6.43 (m, 3H), 3.80 – 3.78 (m, 1H), 3.68 – 3.63 (m, 1H), 3.05 (dd,  $J = 14.8, 4.2$  Hz, 1H), 2.76 (dd,  $J = 14.6, 8.8$  Hz, 1H), 1.20 (d,  $J = 6.4$  Hz, 3H).  $^{13}\text{C}$  NMR (101 MHz,  $\text{CD}_3\text{OD}$ )  $\delta$  151.8, 136.2, 135.7, 134.3, 129.5, 123.7, 121.2, 119.5, 116.0, 112.4, 111.3, 109.5, 74.8, 70.1, 47.6. MS (ESI): Calculated for  $\text{C}_{17}\text{H}_{19}\text{N}_2\text{O}_2$  ( $[\text{M}+\text{H}]^+$ ): 238.1441, found: 238.1444.

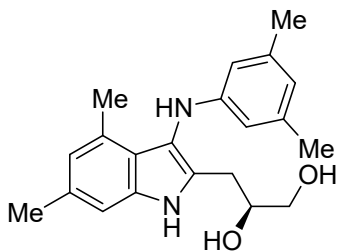

**(S)-3-(3-((3,5-dimethylphenyl)amino)-4,6-dimethyl-1H-indol-2-yl)propane-1,2-diol (10b).** Yellow solid, 108 mg, yield 83%, petroleum ether/ethyl acetate ( $V/V$ )=1:1, m.p. 92.7 - 94.3 °C.  $[\alpha]_{\text{D}}^{25}$  -36.0 ( $c$  0.1,  $\text{CH}_3\text{OH}$ );  $^1\text{H}$  NMR (600 MHz,  $\text{CD}_3\text{OD}$ )  $\delta$  6.81 (s, 1H), 6.40 (s, 1H), 6.13 (s, 1H), 6.03 (s, 2H), 3.83 – 3.81 (m, 1H),



3.39 (dd,  $J = 11.4, 4.2$  Hz, 1H), 3.31 (dd,  $J = 11.4, 6.4$  Hz, 1H), 2.75 (dd,  $J = 14.6, 5.8$  Hz, 1H), 2.66 (dd,  $J = 14.6, 7.4$  Hz, 1H), 2.23 (d,  $J = 7.8$  Hz, 6H), 2.01 (s, 6H).  $^{13}\text{C}$  NMR (151 MHz,  $\text{CD}_3\text{OD}$ )  $\delta$  150.4, 138.0, 135.3, 131.5, 130.1, 128.6, 122.8, 121.7, 118.1, 115.1, 110.5, 108.2, 71.6, 65.5, 47.6, 29.1, 20.3, 20.2, 17.3. MS (ESI): Calculated for  $\text{C}_{21}\text{H}_{27}\text{N}_2\text{O}_2$  ( $[\text{M}+\text{H}]^+$ ): 339.2067, found: 339.2065.

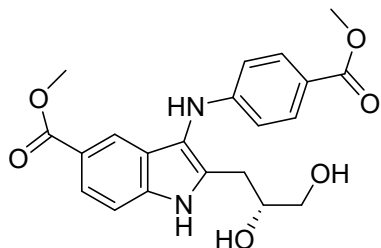

**methyl(*R*)-2-(2,3-dihydroxypropyl)-3-((4-(methoxycarbonyl)phenyl)amino)-1*H*-indole-5-carboxylate (11b)**. Yellow solid, 92 mg, yield 60%, petroleum ether/ethyl acetate ( $V/V$ )=1:2, m.p. 90.6 - 92.4 °C.  $[\alpha]_{\text{D}}^{25} +31.0$  ( $c$  0.1,  $\text{CH}_3\text{OH}$ );  $^1\text{H}$  NMR (600 MHz,  $\text{CD}_3\text{OD}$ )  $\delta$  11.34 (s, 1H), 8.03 (s, 1H), 7.82 (d,  $J = 1.6$  Hz, 1H), 7.68 (dd,  $J = 8.4, 1.4$  Hz, 3H), 7.44 (d,  $J = 8.6$  Hz, 1H), 6.59 (d,  $J = 8.4$  Hz, 2H), 3.80 (dd,  $J = 8.2, 5.2$  Hz, 1H), 3.77 (s, 3H), 3.74 (s, 3H), 3.29 (dd,  $J = 7.4, 5.6$  Hz, 2H), 2.84 (dd,  $J = 14.6, 4.8$  Hz, 1H), 2.65 (dd,  $J = 14.6, 8.2$  Hz, 1H).  $^{13}\text{C}$  NMR (151 MHz,  $\text{CD}_3\text{OD}$ )  $\delta$  168.5, 167.6, 154.3, 138.2, 136.5, 132.3, 125.5, 122.9, 121.2, 120.7, 118.1, 114.9, 113.2, 112.6, 72.0, 66.9, 52.9, 52.5, 31.2. MS (ESI): Calculated for  $\text{C}_{21}\text{H}_{23}\text{N}_2\text{O}_6$  ( $[\text{M}+\text{H}]^+$ ): 399.1551, found: 399.1550.

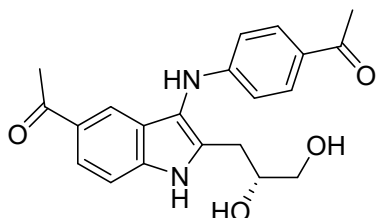

**(*R*)-1-(4-((5-acetyl-2-(2,3-dihydroxypropyl)-1*H*-indol-3-yl)amino)phenyl)ethan-1-one (12b)**. Yellow solid, 91 mg, yield 55%, petroleum ether/ethyl acetate ( $V/V$ )=1:2, m.p. 93.6 - 94.8 °C.  $[\alpha]_{\text{D}}^{25} +28.0$  ( $c$  0.1,  $\text{CH}_3\text{OH}$ );  $^1\text{H}$  NMR (600 MHz,  $\text{CD}_3\text{OD}$ )  $\delta$  7.85 (d,  $J = 1.7$  Hz, 1H), 7.70 - 7.66 (m, 3H), 7.31 (d,  $J = 8.6$  Hz, 1H), 6.54 (d,  $J = 8.5$  Hz, 2H), 3.89 - 3.84 (m, 1H), 3.40 (dd,  $J = 11.2, 4.5$  Hz, 1H), 3.35 (dd,  $J = 11.3, 6.2$  Hz, 1H), 2.84 (dd,  $J = 14.7, 5.2$  Hz, 1H), 2.73 (dd,  $J = 14.7, 7.8$  Hz, 1H), 2.44 (s, 3H), 2.36 (s, 3H).  $^{13}\text{C}$  NMR (151 MHz,  $\text{CD}_3\text{OD}$ )  $\delta$  199.7, 197.8, 153.7, 137.7, 134.3, 130.7, 128.7, 126.0, 124.7, 121.4, 119.5, 114.7, 111.8, 110.8, 71.2, 65.5, 47.6, 29.3, 25.2, 24.6. MS (ESI): Calculated for  $\text{C}_{21}\text{H}_{23}\text{N}_2\text{O}_4$  ( $[\text{M}+\text{H}]^+$ ): 367.1652, found: 367.1651.

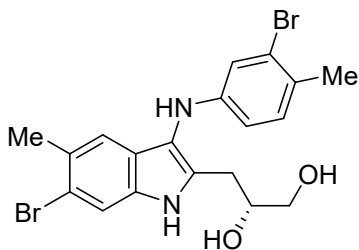

**(R)-3-(6-bromo-3-((3-bromo-4-methylphenyl)amino)-5-methyl-1H-indol-2-yl)propane-1,2-diol**

**(13b)**. Yellow solid, 140 mg, yield 72%, petroleum ether/ethyl acetate (*V/V*)=1:1, m.p. 97.5 - 99.7 °C.  $[\alpha]_{\text{D}}^{25} +40.0$  (*c* 0.1, CH<sub>3</sub>OH); <sup>1</sup>H NMR (600 MHz, CD<sub>3</sub>OD)  $\delta$  7.10 (d, *J* = 8.2 Hz, 1H), 6.87 (d, *J* = 8.2 Hz, 1H), 6.83 (d, *J* = 8.4 Hz, 1H), 6.54 (d, *J* = 2.4 Hz, 1H), 6.27 (dd, *J* = 8.4, 2.4 Hz, 1H), 3.89 – 3.83 (m, 1H), 3.40 (dd, *J* = 11.4, 4.4 Hz, 1H), 3.33 (dd, *J* = 11.4, 6.4 Hz, 1H), 2.79 (dd, *J* = 14.6, 5.6 Hz, 1H), 2.68 (dd, *J* = 14.6, 7.6 Hz, 1H), 2.28 (s, 3H), 2.11 (s, 3H). <sup>13</sup>C NMR (151 MHz, CD<sub>3</sub>OD)  $\delta$  149.8, 135.3, 134.4, 130.4, 127.8, 124.5, 124.4, 124.0, 123.5, 116.1, 113.7, 112.9, 112.3, 109.8, 71.3, 65.5, 29.2, 21.0, 20.3. MS (ESI): Calculated for C<sub>19</sub>H<sub>21</sub>N<sub>2</sub>O<sub>2</sub>Br<sub>2</sub> ([M+H]<sup>+</sup>): 466.9964, found: 466.9967.

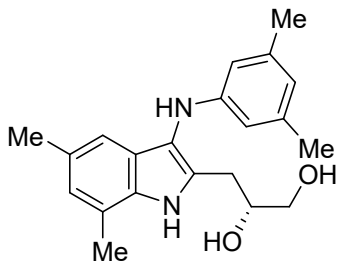

**(R)-3-(3-((3,5-dimethylphenyl)amino)-5,7-dimethyl-1H-indol-2-yl)propane-1,2-diol (14b)**. Yellow solid, 95 mg, yield 74%, petroleum ether/ethyl acetate (*V/V*)=1:1, m.p. 108.5 - 109.3 °C.  $[\alpha]_{\text{D}}^{25} +17.0$  (*c* 0.1, CH<sub>3</sub>OH); <sup>1</sup>H NMR (400 MHz, CD<sub>3</sub>OD)  $\delta$  6.95 (s, 1H), 6.53 (s, 1H), 6.26 (s, 1H), 6.16 (s, 2H), 3.96 (qd, *J* = 6.4, 4.1 Hz, 1H), 3.53 (dd, *J* = 11.3, 4.1 Hz, 1H), 3.44 (dd, *J* = 11.3, 6.3 Hz, 1H), 2.89 (dd, *J* = 14.5, 5.9 Hz, 1H), 2.80 (dd, *J* = 14.5, 7.2 Hz, 1H), 2.37 (d, *J* = 6.0 Hz, 6H), 2.14 (s, 6H). <sup>13</sup>C NMR (101 MHz, CD<sub>3</sub>OD)  $\delta$  150.5, 138.0, 135.4, 131.5, 130.1, 128.7, 122.8, 121.7, 118.2, 115.1, 110.5, 108.2, 71.6, 65.5, 29.1, 20.3, 17.4. MS (ESI): Calculated for C<sub>21</sub>H<sub>27</sub>N<sub>2</sub>O<sub>2</sub> ([M+H]<sup>+</sup>): 339.2067, found: 339.2066.

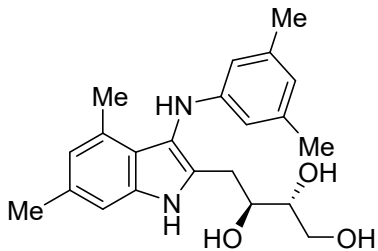

**(2R,3S)-4-(3-((3,5-dimethylphenyl)amino)-4,6-dimethyl-1H-indol-2-yl)butane-1,2,3-triol (15b)**. Yellow solid, 117 mg, yield 82%, petroleum ether/ethyl acetate (*V/V*)=1:1, m.p. 122.6 - 123.4 °C.  $[\alpha]_{\text{D}}^{25} -9.0$  (*c* 0.1, CH<sub>3</sub>OH); <sup>1</sup>H NMR (600 MHz, CD<sub>3</sub>OD)  $\delta$  6.92 (s, 1H), 6.50 (s, 1H), 6.24 (s, 1H), 6.15 (s, 2H), 3.86 (dd, *J* = 9.8, 5.0 Hz, 1H), 3.73 – 3.66 (m, 1H), 3.60 – 3.52 (m, 1H), 3.50 – 3.41 (m, 1H), 3.01 (dd, *J* = 14.8, 4.0 Hz, 1H), 2.80 (dd, *J* = 14.8, 8.2 Hz, 1H), 2.34 (s, 6H), 2.11 (s, 6H). <sup>13</sup>C NMR (151 MHz, CD<sub>3</sub>OD)  $\delta$  151.8, 139.5, 139.4, 136.7, 133.2, 131.5, 130.0, 124.2, 123.1, 119.7, 119.7, 116.6, 112.1, 112.0, 109.6, 109.6, 75.9, 73.5, 64.6, 64.5, 30.2, 21.7, 21.6, 21.6, 18.8, 18.7. MS (ESI): Calculated for C<sub>22</sub>H<sub>29</sub>N<sub>2</sub>O<sub>3</sub> ([M+H]<sup>+</sup>): 369.2173, found: 369.2175.

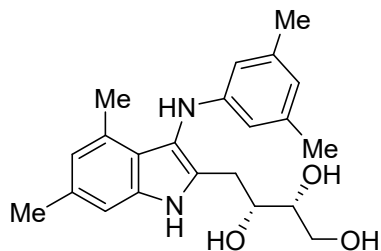

**(2R,3R)-4-(3-((3,5-dimethylphenyl)amino)-4,6-dimethyl-1H-indol-2-yl)butane-1,2,3-triol (16b).** Yellow solid, 119 mg, yield 76%, petroleum ether/ethyl acetate (*V/V*)=1:1, m.p. 107.5 - 108.9 °C.  $[\alpha]_{\text{D}}^{25}$  -2.0 (*c* 0.1, CH<sub>3</sub>OH); <sup>1</sup>H NMR (600 MHz, CD<sub>3</sub>OD)  $\delta$  6.80 (s, 1H), 6.39 (s, 1H), 6.12 (s, 1H), 6.03 (s, 2H), 3.84 – 3.76 (m, 1H), 3.45 (t, *J* = 6.0 Hz, 2H), 3.35 (ddd, *J* = 6.4, 5.4, 3.0 Hz, 1H), 2.84 – 2.74 (m, 2H), 2.22 (s, 6H), 1.99 (s, 6H). <sup>13</sup>C NMR (151 MHz, CD<sub>3</sub>OD)  $\delta$  150.4, 138.1, 135.3, 131.6, 130.2, 128.6, 122.8, 121.7, 118.2, 115.1, 110.6, 108.2, 73.2, 70.8, 63.4, 29.3, 20.3, 20.3, 17.4. MS (ESI): Calculated for C<sub>22</sub>H<sub>29</sub>N<sub>2</sub>O<sub>3</sub> ([M+H]<sup>+</sup>): 369.2173, found: 369.2170.

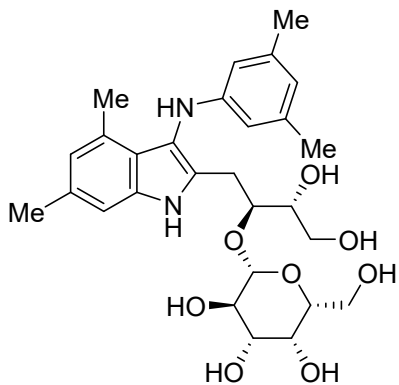

**(2R,3R,4S,5R,6R)-2-(((2S,3R)-1-(3-((3,5-dimethylphenyl)amino)-4,6-dimethyl-1H-indol-2-yl)-3,4-dihydroxybutan-2-yl)oxy)-6-(hydroxymethyl)tetrahydro-2H-pyran-3,4,5-triol. (17b).** Yellow solid, 82 mg, yield 73%, DCM/MeOH (*V/V*) = 5:1, m.p. 130.6 - 131.2 °C.  $[\alpha]_{\text{D}}^{25}$  +10.0 (*c* 0.1, CH<sub>3</sub>OH); <sup>1</sup>H NMR (600 MHz, CD<sub>3</sub>OD)  $\delta$  6.97 (s, 1H), 6.52 (s, 1H), 6.27 (s, 1H), 6.19 (s, 2H), 4.44 (d, *J* = 7.8 Hz, 1H), 4.03 (d, *J* = 5.6 Hz, 1H), 3.89 (d, *J* = 3.4 Hz, 1H), 3.78 (dd, *J* = 6.2, 2.0 Hz, 2H), 3.69 – 3.64 (m, 2H), 3.64 – 3.57 (m, 2H), 3.55 (t, *J* = 6.2 Hz, 1H), 3.51 (dd, *J* = 9.8, 3.4 Hz, 1H), 3.08 (d, *J* = 4.8 Hz, 2H), 2.36 (s, 6H), 2.13 (s, 6H). <sup>13</sup>C NMR (151 MHz, CD<sub>3</sub>OD)  $\delta$  150.2, 138.1, 135.3, 130.8, 130.1, 128.5, 122.5, 121.6, 118.4, 115.4, 110.8, 108.3, 104.4, 81.0, 75.3, 73.4, 72.6, 71.6, 68.9, 62.7, 61.1, 26.7, 20.3, 20.3, 17.3. MS (ESI): Calculated for C<sub>28</sub>H<sub>39</sub>N<sub>2</sub>O<sub>8</sub> ([M+H]<sup>+</sup>): 531.2701, found: 531.2700.

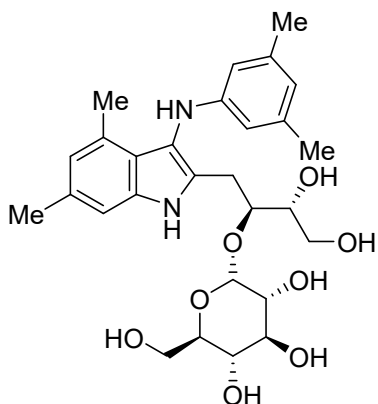

**(2*S*,3*R*,4*S*,5*S*,6*R*)-2-(((2*S*,3*R*)-1-(3-((3,5-dimethylphenyl)amino)-4,6-dimethyl-1*H*-indol-2-yl)-3,4-dihydroxybutan-2-yl)oxy)-6-(hydroxymethyl)tetrahydro-2*H*-pyran-3,4,5-triol (18b).** Yellow solid, 90 mg, yield 81%, DCM/MeOH (*V/V*) = 5:1, m.p. 139.5 - 140.1 °C.  $[\alpha]_{\text{D}}^{25} +62.0$  (*c* 0.1, CH<sub>3</sub>OH); <sup>1</sup>H NMR (600 MHz, CD<sub>3</sub>OD)  $\delta$  6.83 (s, 1H), 6.39 (s, 1H), 6.13 (s, 1H), 6.03 (s, 2H), 4.95 (d, *J* = 3.8 Hz, 1H), 3.87- 3.83 (m, 1H), 3.73 (dd, *J* = 11.6, 2.4 Hz, 1H), 3.68 (ddd, *J* = 10.2, 5.6, 2.4 Hz, 1H), 3.63 (t, *J* = 9.4 Hz, 1H), 3.58 (dd, *J* = 11.6, 5.6 Hz, 1H), 3.53 (dt, *J* = 6.2, 3.2 Hz, 1H), 3.50 – 3.44 (m, 2H), 3.43 – 3.40 (m, 1H), 3.23 (d, *J* = 10.2 Hz, 1H), 2.92 – 2.81 (m, 2H), 2.24 (d, *J* = 9.8 Hz, 6H), 2.00 (s, 6H). <sup>13</sup>C NMR (151 MHz, CD<sub>3</sub>OD)  $\delta$  150.4, 138.1, 135.4, 131.1, 130.0, 128.6, 122.5, 121.6, 118.2, 115.3, 110.5, 108.3, 97.9, 78.3, 73.7, 72.9, 72.8, 72.1, 70.3, 63.0, 61.2, 23.7, 20.3, 20.3, 17.3. MS (ESI): Calculated for C<sub>28</sub>H<sub>39</sub>N<sub>2</sub>O<sub>8</sub> ([M+H]<sup>+</sup>): 531.2701, found: 531.2703.

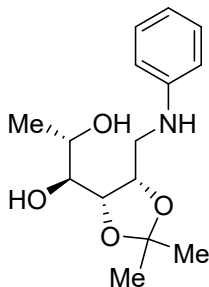

**(1*S*)-1-((4*S*,5*S*)-2,2-dimethyl-5-((phenylamino)methyl)-1,3-dioxolan-4-yl)propane-1,2-diol (1c).** Yellow solid, petroleum ether/ethyl acetate (*V/V*) = 1:1, m.p. 112.6 - 113.4 °C. <sup>1</sup>H NMR (600 MHz, CD<sub>3</sub>OD)  $\delta$  7.01 (dd, *J* = 8.6, 7.2 Hz, 2H), 6.59 (d, *J* = 8.0 Hz, 2H), 6.55 (d, *J* = 7.4 Hz, 1H), 4.35 – 4.27 (m, 2H), 3.63 – 3.58 (m, 1H), 3.38 – 3.32 (m, 2H), 3.19 (dd, *J* = 12.4, 7.0 Hz, 1H), 1.39 (s, 3H), 1.27 (s, 3H), 1.17 (d, *J* = 6.2 Hz, 3H). <sup>13</sup>C NMR (151 MHz, CD<sub>3</sub>OD)  $\delta$  148.5, 128.7, 128.7, 117.2, 113.1, 107.7, 76.3, 75.8, 73.0, 68.2, 44.4, 24.0, 22.8, 19.0. MS (ESI): Calculated for C<sub>15</sub>H<sub>24</sub>NO<sub>4</sub> ([M+H]<sup>+</sup>): 282.1700, found: 282.1702. MS (ESI): Calculated for C<sub>15</sub>H<sub>24</sub>NO<sub>4</sub> ([M+H]<sup>+</sup>): 282.1700, found: 282.1701.

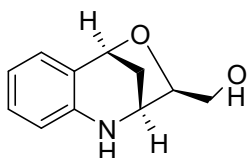

**(3R)-1,3,4,6-tetrahydro-2H-2,6-methanobenzo[c][1,5]oxazocin-3-ol(2c).** Yellow solid, yield 31%. petroleum ether/ethyl acetate (*V/V*) = 3:1, m.p. 121.4 - 123.1°C. <sup>1</sup>H NMR (400 MHz, CDCl<sub>3</sub>) δ 7.19 – 7.11 (m, 2H), 6.72 (t, *J* = 7.4 Hz, 1H), 6.64 (d, *J* = 8.0 Hz, 1H), 4.70 (p, *J* = 1.4 Hz, 1H), 3.82 – 3.75 (m, 1H), 3.72 (dd, *J* = 11.2, 5.8 Hz, 1H), 3.64 (d, *J* = 3.4 Hz, 1H), 2.92 (t, *J* = 10.6 Hz, 1H), 2.12 (ddd, *J* = 13.4, 3.4, 2.4 Hz, 1H), 1.89 (ddd, *J* = 13.2, 4.6, 1.8 Hz, 1H). <sup>13</sup>C NMR (101 MHz, CDCl<sub>3</sub>) δ 145.4, 130.7, 129.7, 119.9, 117.7, 113.7, 68.9, 67.5, 62.8, 48.8, 27.8. MS (ESI): Calculated for C<sub>11</sub>H<sub>14</sub>NO<sub>2</sub> ([M+H]<sup>+</sup>): 192.1019, found: 192.1019.

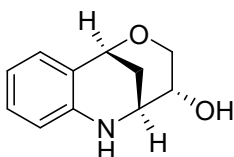

**((3R)-1,2,3,5-tetrahydro-2,5-methanobenzo[e][1,4]oxazepin-3-yl)methanol(2c').** Yellow solid, yield 28%. petroleum ether/ethyl acetate (*V/V*) = 3:1, m.p. 118.5 - 119.1°C. <sup>1</sup>H NMR (400 MHz, CDCl<sub>3</sub>) δ 7.18 – 7.13 (m, 2H), 6.70 – 6.68 (m, 1H), 6.56 (dd, *J* = 8.4, 1.0 Hz, 1H), 4.75 (p, *J* = 1.6 Hz, 1H), 3.68 – 3.65 (m, 1H), 3.60 – 3.49 (m, 3H), 2.58 – 2.56 (m, 1H), 1.60 – 1.57 (m, 1H). <sup>13</sup>C NMR (101 MHz, CDCl<sub>3</sub>) δ 144.7, 130.8, 129.9, 118.4, 117.0, 113.0, 70.1, 69.0, 63.8, 47.8, 29.8, 23.9. MS (ESI): Calculated for C<sub>11</sub>H<sub>14</sub>NO<sub>2</sub> ([M+H]<sup>+</sup>): 192.1019, found: 192.1018.

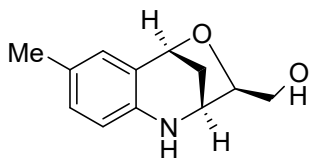

**(3R)-8-methyl-1,3,4,6-tetrahydro-2H-2,6-methanobenzo[c][1,5]oxazocin-3-ol (3c).** Yellow solid, yield 29%. petroleum ether/ethyl acetate (*V/V*) = 3:1, m.p. 131.9 - 132.8°C. <sup>1</sup>H NMR (400 MHz, CDCl<sub>3</sub>) δ 6.98 (dd, *J* = 8.1, 2.0 Hz, 1H), 6.95 (d, *J* = 2.0 Hz, 1H), 6.57 (d, *J* = 8.2 Hz, 1H), 4.66 (t, *J* = 2.4 Hz, 1H), 3.79 – 3.68 (m, 2H), 3.62 (p, *J* = 2.6 Hz, 1H), 2.91 (t, *J* = 10.2 Hz, 1H), 2.24 (s, 3H), 2.11 (dt, *J* = 13.2, 2.8 Hz, 1H), 1.88 (ddd, *J* = 13.2, 4.6, 1.8 Hz, 1H). <sup>13</sup>C NMR (101 MHz, CDCl<sub>3</sub>) δ 143.0, 130.9, 130.5, 127.1, 120.0, 114.0, 68.8, 67.6, 67.5, 62.9, 48.8, 28.0, 20.4. MS (ESI): Calculated for C<sub>12</sub>H<sub>16</sub>NO<sub>2</sub> ([M+H]<sup>+</sup>): 206.1176, found: 206.1175.

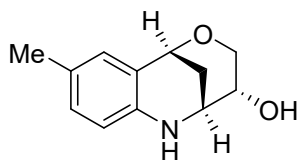

**((3R)-7-methyl-1,2,3,5-tetrahydro-2,5-methanobenzo[e][1,4]oxazepin-3-yl)methanol (3c').** Yellow solid, yield 34%. petroleum ether/ethyl acetate (*V/V*) = 3:1, m.p. 127.2 - 128.8°C. <sup>1</sup>H NMR (400 MHz, CDCl<sub>3</sub>) δ 6.97 (d, *J* = 6.6 Hz, 2H), 6.50 – 6.47 (m, 1H), 4.71 – 4.70 (m, 1H), 3.66 – 3.62 (m, 1H), 3.57 – 3.49 (m, 3H), 2.59 – 2.55 (m, 1H), 2.24 (s, 3H), 1.61 – 1.54 (m, 1H). <sup>13</sup>C NMR (101 MHz, CDCl<sub>3</sub>) δ 142.3, 131.0,

130.6, 126.2, 118.3, 113.0, 70.3, 69.1, 69.0, 63.8, 47.9, 24.1, 20.4. MS (ESI): Calculated for C<sub>12</sub>H<sub>16</sub>NO<sub>2</sub> ([M+H]<sup>+</sup>): 206.1176, found: 206.1177.

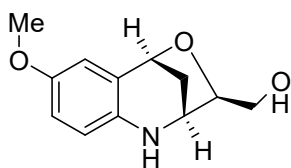

**(3R)-8-methoxy-1,3,4,6-tetrahydro-2H-2,6-methanobenzo[c][1,5]oxazocin-3-ol(4c).** Yellow solid, yield 34%. petroleum ether/ethyl acetate (*V/V*) = 3:1, m.p. 115.4 - 116.7°C. <sup>1</sup>H NMR (400 MHz, CDCl<sub>3</sub>) δ 6.79 (dd, *J* = 8.8, 3.0 Hz, 1H), 6.71 (d, *J* = 2.8 Hz, 1H), 6.61 (d, *J* = 8.7 Hz, 1H), 4.65 (s, 1H), 3.74 (d, *J* = 6.3 Hz, 6H), 3.59 (s, 1H), 2.91 (q, *J* = 9.0, 7.4 Hz, 1H), 2.12 – 2.10 (m, 1H), 1.89 – 1.86 (m, 1H). <sup>13</sup>C NMR (101 MHz, CDCl<sub>3</sub>) δ 152.2, 139.2, 120.8, 116.9, 115.4, 114.7, 68.6, 67.7, 63.0, 55.8, 48.7, 28.0. MS (ESI): Calculated for C<sub>12</sub>H<sub>16</sub>NO<sub>3</sub> ([M+H]<sup>+</sup>): 222.1125, found: 222.1126.

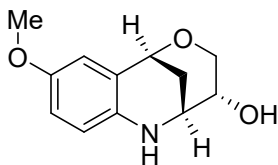

**(3R)-7-methoxy-1,2,3,5-tetrahydro-2,5-methanobenzo[e][1,4]oxazepin-3-yl)methanol(4c').** Yellow solid, yield 36%. petroleum ether/ethyl acetate (*V/V*) = 3:1, m.p. 119.3 - 121.2°C. <sup>1</sup>H NMR (400 MHz, CDCl<sub>3</sub>) δ 6.79 (dd, *J* = 8.6, 2.6 Hz, 1H), 6.73 (d, *J* = 2.9 Hz, 1H), 6.51 (d, *J* = 8.6 Hz, 1H), 4.70 (s, 1H), 3.74 (d, *J* = 1.0 Hz, 3H), 3.60 (d, *J* = 8.2 Hz, 1H), 3.57 – 3.46 (m, 3H), 2.58 – 2.55 (m, 1H), 1.61 – 1.53 (m, 1H). <sup>13</sup>C NMR (101 MHz, CDCl<sub>3</sub>) δ 151.6, 138.8, 119.0, 117.1, 114.9, 114.3, 70.3, 69.2, 63.9, 55.9, 47.9, 24.0. MS (ESI): Calculated for C<sub>12</sub>H<sub>16</sub>NO<sub>3</sub> ([M+H]<sup>+</sup>): 222.1125, found: 222.1128.

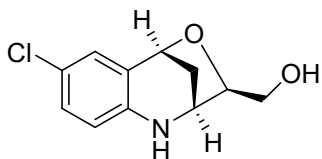

**(3R)-8-chloro-1,3,4,6-tetrahydro-2H-2,6-methanobenzo[c][1,5]oxazocin-3-ol (5c).** Yellow solid, yield 26%. petroleum ether/ethyl acetate (*V/V*) = 3:1, m.p. 125.2 - 126.1°C. <sup>1</sup>H NMR (400 MHz, CDCl<sub>3</sub>) δ 7.10 (d, *J* = 7.6 Hz, 2H), 6.60 – 6.56 (m, 1H), 4.64 (s, 1H), 4.48 (s, 1H), 3.80 – 3.38 (m, 1H), 3.73 (dd, *J* = 11.0, 6.0 Hz, 1H), 3.65 (s, 1H), 2.90 (t, *J* = 10.8 Hz, 1H), 2.14 – 2.10 (m, 1H), 1.85 (ddd, *J* = 13.1, 4.5, 1.8 Hz, 1H). <sup>13</sup>C NMR (101 MHz, CDCl<sub>3</sub>) δ 144.0, 130.2, 129.6, 122.2, 121.2, 114.9, 68.9, 67.1, 67.1, 62.8, 48.8, 27.6. MS (ESI): Calculated for C<sub>11</sub>H<sub>13</sub>NCIO<sub>2</sub> ([M+H]<sup>+</sup>): 226.0629, found: 226.0629.

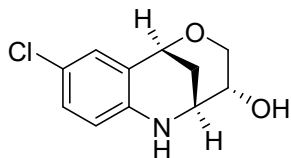

**((3R)-7-chloro-1,2,3,5-tetrahydro-2,5-methanobenzo[e][1,4]oxazepin-3-yl)methanol(5c')**. Yellow solid, yield 26%, petroleum ether/ethyl acetate (*V/V*) = 3:1, m.p. 132.7 - 133.5 °C. <sup>1</sup>H NMR (400 MHz, CDCl<sub>3</sub>) δ 7.12 (d, *J* = 2.6 Hz, 1H), 7.09 (dd, *J* = 8.6, 2.6 Hz, 1H), 6.49 (d, *J* = 8.6 Hz, 1H), 4.68 (s, 1H), 4.42 (s, 1H), 3.74 – 3.63 (m, 2H), 3.58 (d, *J* = 13.0 Hz, 1H), 3.53 – 3.45 (m, 2H), 2.59 – 2.56 (m, 1H), 2.45 (s, 1H), 1.53 - 1.52 (m, 1H). <sup>13</sup>C NMR (101 MHz, CDCl<sub>3</sub>) δ 143.2, 130.3, 129.8, 128.0, 121.4, 119.7, 114.2, 69.9, 68.5, 63.8, 47.7, 23.6. MS (ESI): Calculated for C<sub>11</sub>H<sub>13</sub>NCIO<sub>2</sub> ([M+H]<sup>+</sup>): 226.0629, found: 226.0628.

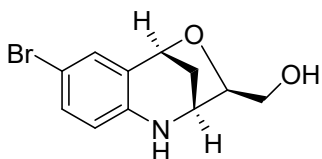

**(3R)-8-bromo-1,3,4,6-tetrahydro-2H-2,6-methanobenzo[c][1,5]oxazocin-3-ol(6c)**. Yellow solid, yield 24%, petroleum ether/ethyl acetate (*V/V*) = 3:1, m.p. 110.5 - 112.1 °C. <sup>1</sup>H NMR (400 MHz, CDCl<sub>3</sub>) δ 7.25 – 7.19 (m, 2H), 6.53 (d, *J* = 8.2 Hz, 1H), 4.64 (s, 1H), 4.51 (s, 1H), 3.79 – 3.76 (m, 2H), 3.65 (s, 1H), 2.90 (t, *J* = 10.6 Hz, 1H), 2.16 – 2.08 (m, 1H), 1.87 – 1.84 (m, 1H). <sup>13</sup>C NMR (101 MHz, CDCl<sub>3</sub>) δ 144.5, 133.0, 132.4, 121.7, 115.3, 109.1, 68.9, 67.0, 62.8, 48.7, 27.5. MS (ESI): Calculated for C<sub>11</sub>H<sub>13</sub>NBrO<sub>2</sub> ([M+H]<sup>+</sup>): 270.0124, found: 270.0126.

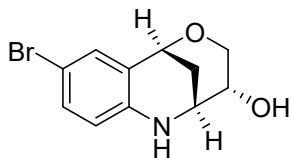

**((3R)-7-bromo-1,2,3,5-tetrahydro-2,5-methanobenzo[e][1,4]oxazepin-3-yl)methanol(6c')**. Yellow solid, yield 27%, petroleum ether/ethyl acetate (*V/V*) = 3:1, m.p. 120.3 - 121.5 °C. <sup>1</sup>H NMR (400 MHz, CDCl<sub>3</sub>) δ 7.26 – 7.19 (m, 2H), 6.44 (d, *J* = 8.6 Hz, 1H), 4.73 – 4.64 (m, 1H), 4.44 (d, *J* = 4.4 Hz, 1H), 3.66 (d, *J* = 5.8 Hz, 1H), 3.57 (d, *J* = 13.0 Hz, 1H), 3.53 – 3.45 (m, 2H), 3.39 – 3.36 (m, 1H), 2.59 – 2.55 (m, 1H), 1.54 – 1.51 (m, 1H). <sup>13</sup>C NMR (101 MHz, CDCl<sub>3</sub>) δ 143.6, 133.2, 132.6, 120.2, 114.6, 108.3, 69.8, 68.5, 63.8, 47.7, 23.5. MS (ESI): Calculated for C<sub>11</sub>H<sub>13</sub>NBrO<sub>2</sub> ([M+H]<sup>+</sup>): 270.0124, found: 270.0125.

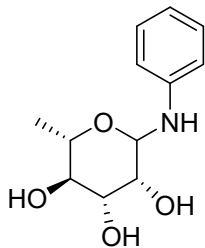

**(2*S*,3*R*,4*R*,5*R*)-2-methyl-6-(phenylamino)tetrahydro-2*H*-pyran-3,4,5-triol (A)**. Yellow solid, petroleum ether/ethyl acetate (*V/V*)=1:3, m.p. 96.7 - 97.2 °C. <sup>1</sup>H NMR (600 MHz, MeOD) δ 7.03 (dd, *J* = 8.6, 7.2 Hz, 2H), 6.63 (d, *J* = 8.0 Hz, 2H), 6.60 (t, *J* = 7.4 Hz, 1H), 4.73 (s, 1H), 3.81 (d, *J* = 3.4 Hz, 1H), 3.42 (dd, *J* = 5.4, 3.8 Hz, 1H), 3.25 (dd, *J* = 7.6, 4.8 Hz, 2H), 1.17 (d, *J* = 5.6 Hz, 3H). <sup>13</sup>C NMR (151 MHz, MeOD) δ 145.7, 128.6, 118.1, 113.7, 82.0, 74.5, 72.8, 72.6, 71.7, 16.6.

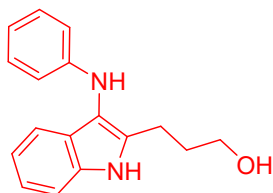

**3-(3-(phenylamino)-1*H*-indol-2-yl)propan-1-ol (7c)**: Yellow solid, petroleum ether/ethyl acetate (*V/V*)=1:1, <sup>1</sup>H NMR (600 MHz, CDCl<sub>3</sub>) δ 8.24 (s, 1H), 7.33 (dd, *J* = 20.6, 8.0 Hz, 2H), 7.14 (q, *J* = 8.2 Hz, 3H), 7.04 (t, *J* = 7.6 Hz, 1H), 6.72 (t, *J* = 7.4 Hz, 1H), 6.64 (d, *J* = 7.8 Hz, 2H), 5.22 (s, 1H), 3.67 (t, *J* = 6.0 Hz, 2H), 2.88 (t, *J* = 7.2 Hz, 2H), 1.89 (t, *J* = 6.6 Hz, 2H). <sup>13</sup>C NMR (150 MHz, CDCl<sub>3</sub>) δ 148.3, 134.6, 134.3, 129.1, 126.0, 121.6, 119.5, 118.1, 117.8, 114.4, 113.4, 110.8, 61.8, 31.2, 21.7. MS (ESI): Calculated for C<sub>17</sub>H<sub>19</sub>N<sub>2</sub>O ([*M*+*H*]<sup>+</sup>): 267.1492, found: 267.1498.



### 3. NMR spectra of the compounds

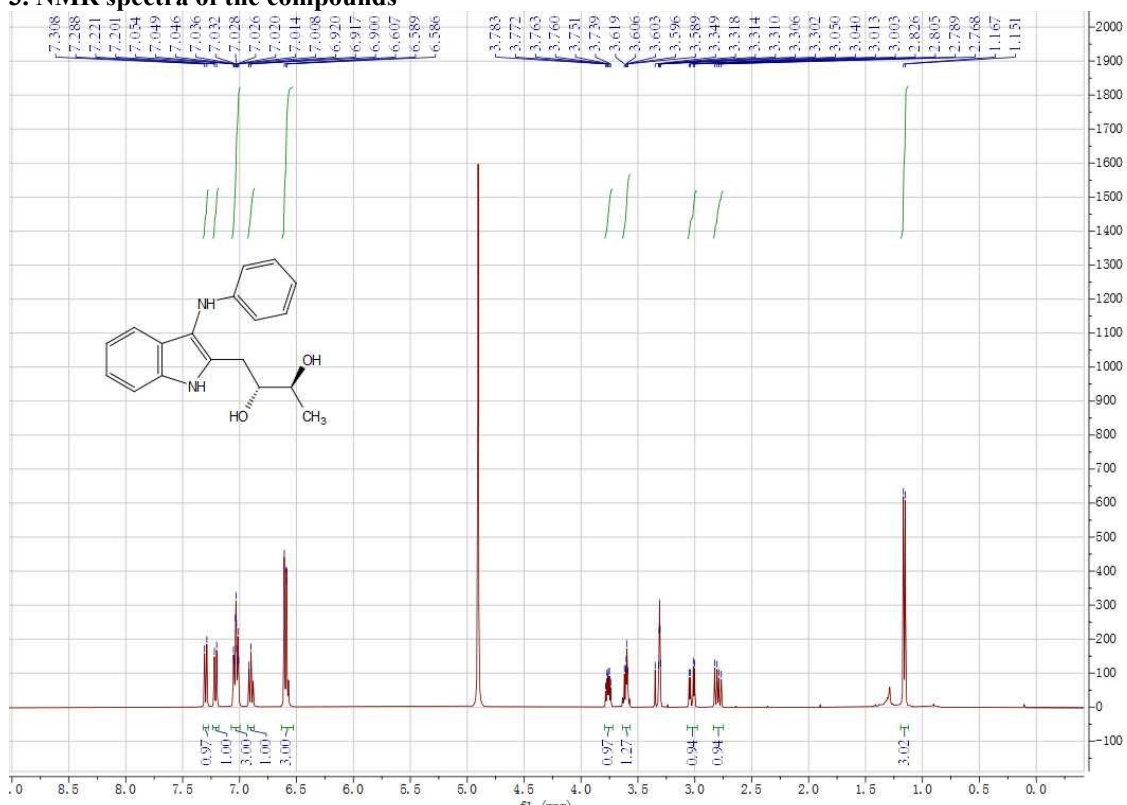

Figure. S1  $^1\text{H}$  NMR of compound 1a

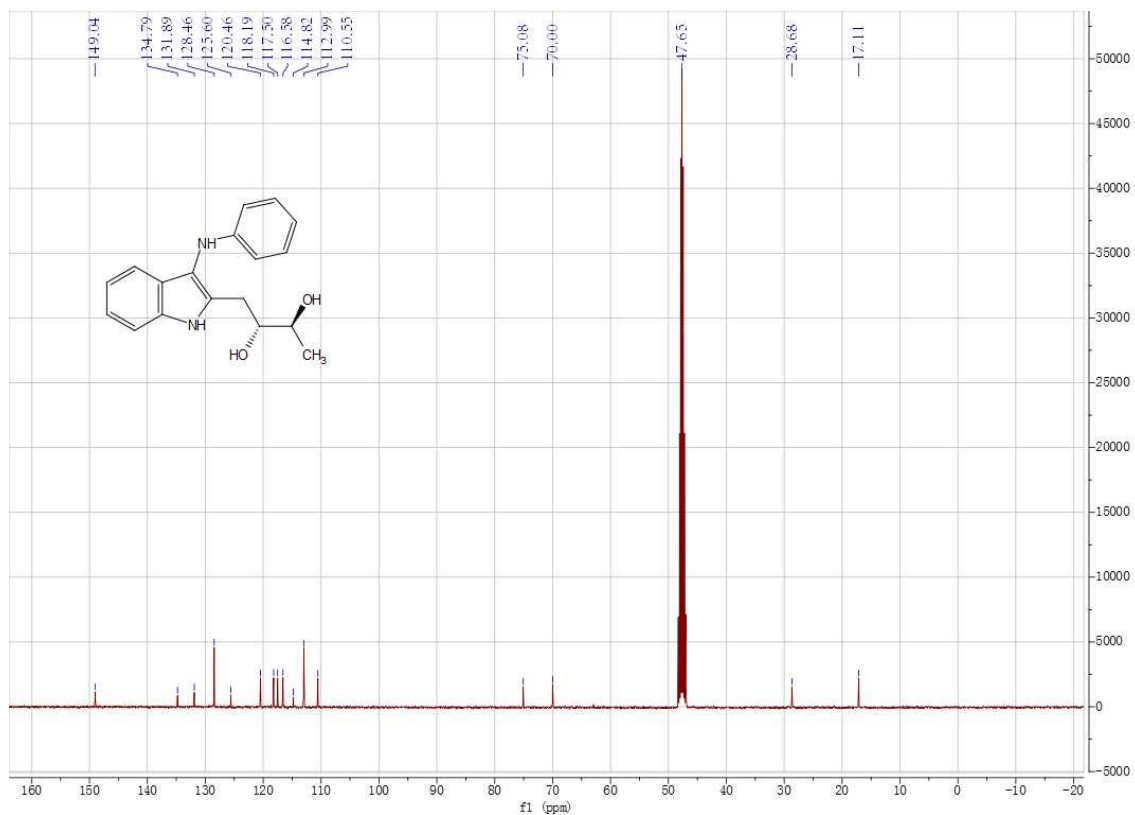

Figure. S2  $^{13}\text{C}\{^1\text{H}\}$  NMR of compound 1a

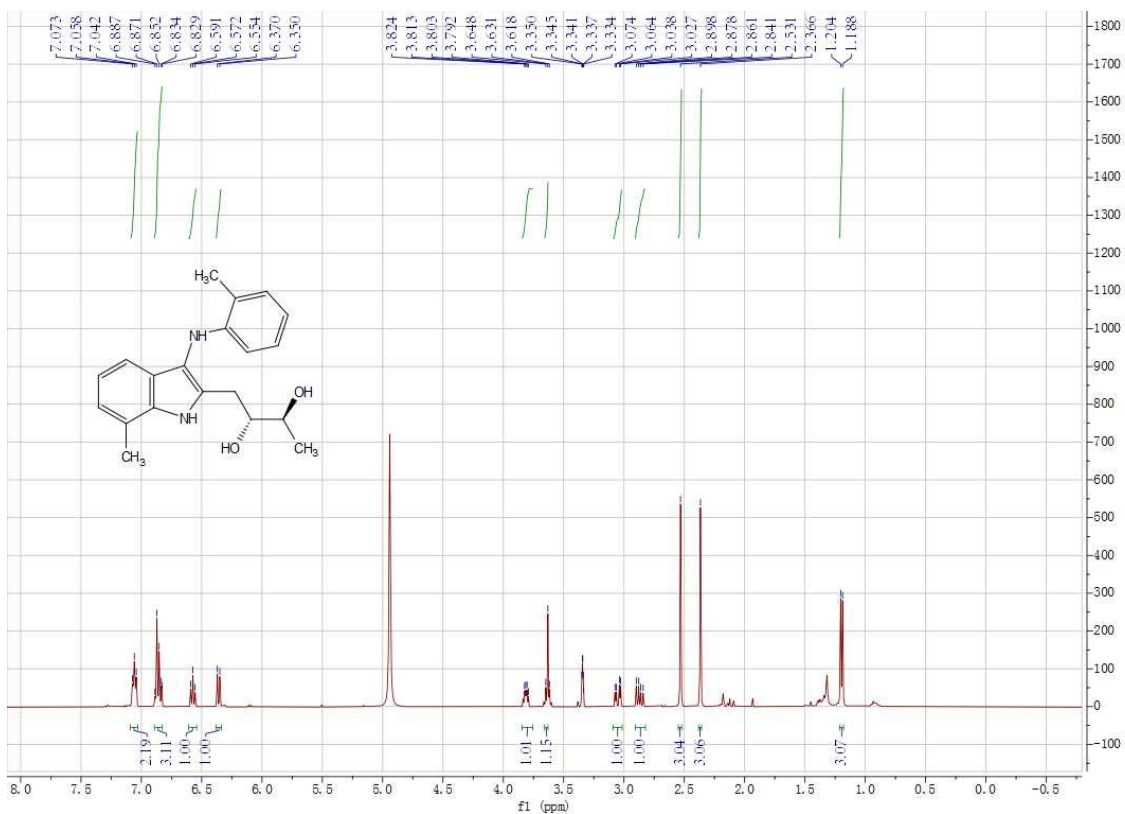

Figure.S3<sup>1</sup>H NMR of compound 2a

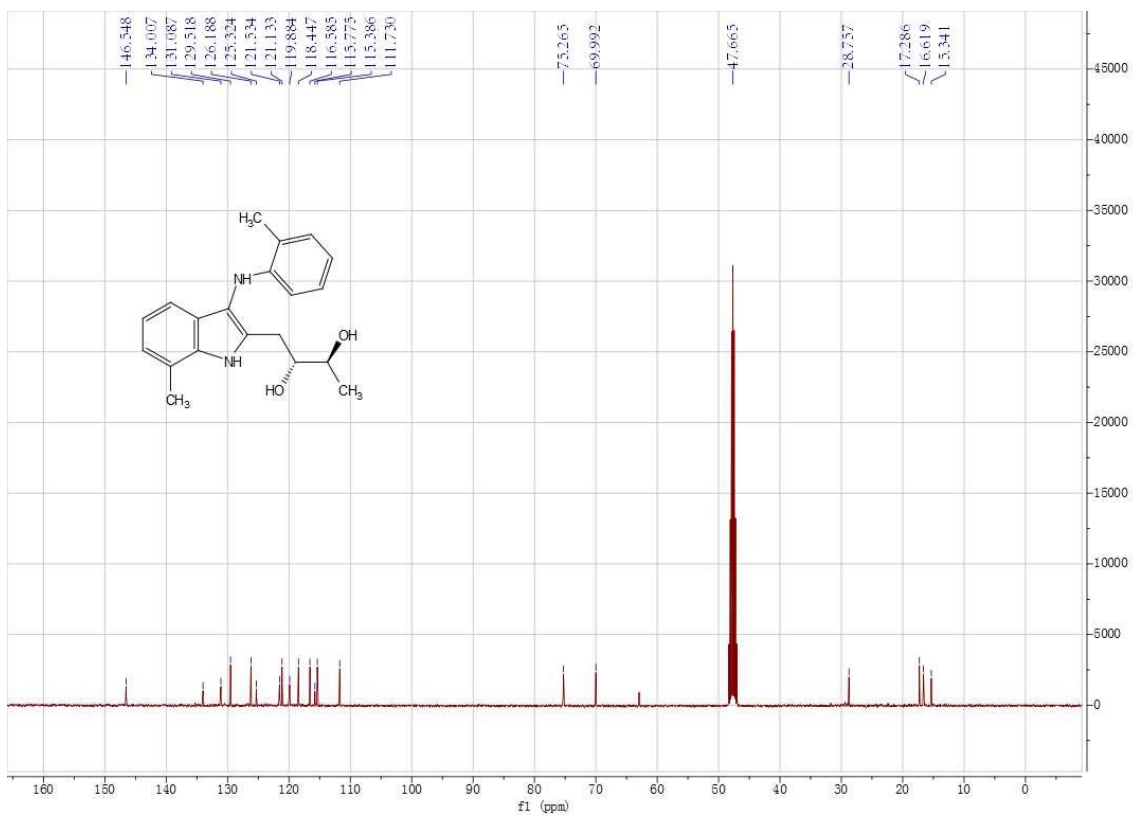

Figure. S4<sup>13</sup>C{<sup>1</sup>H} NMR of compound 2a

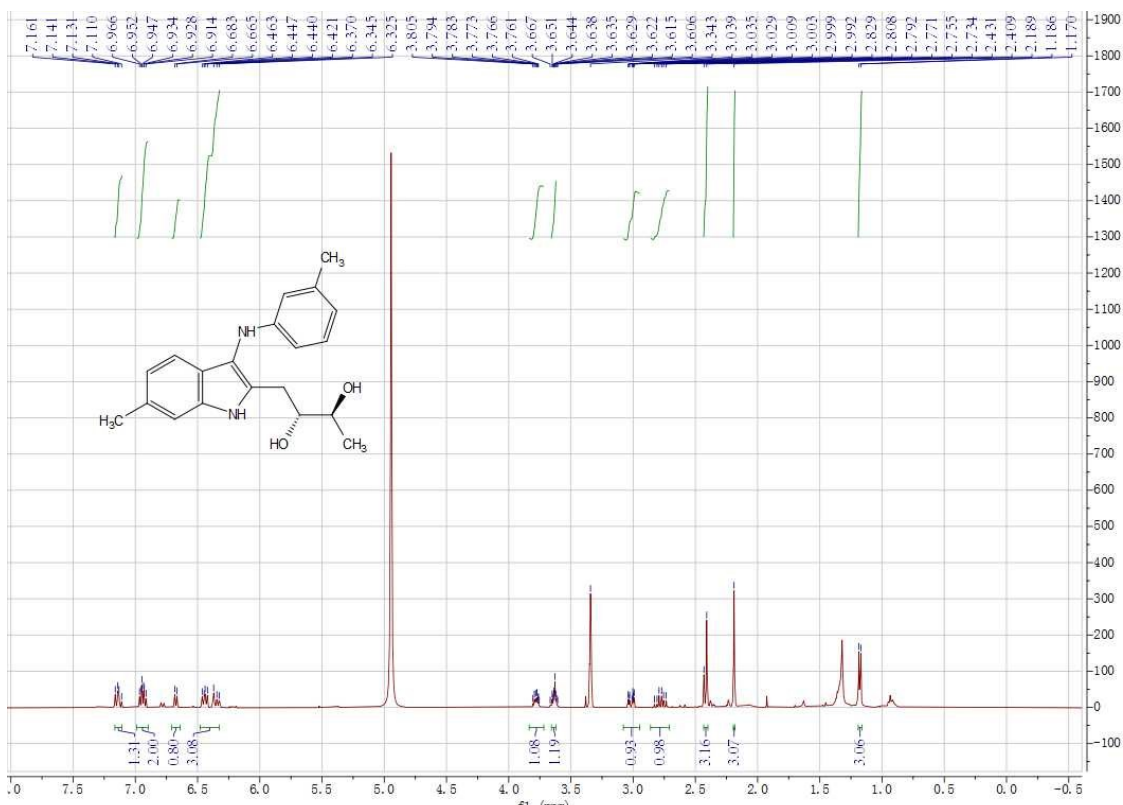

Figure. S5<sup>1</sup>H NMR of compound 3a

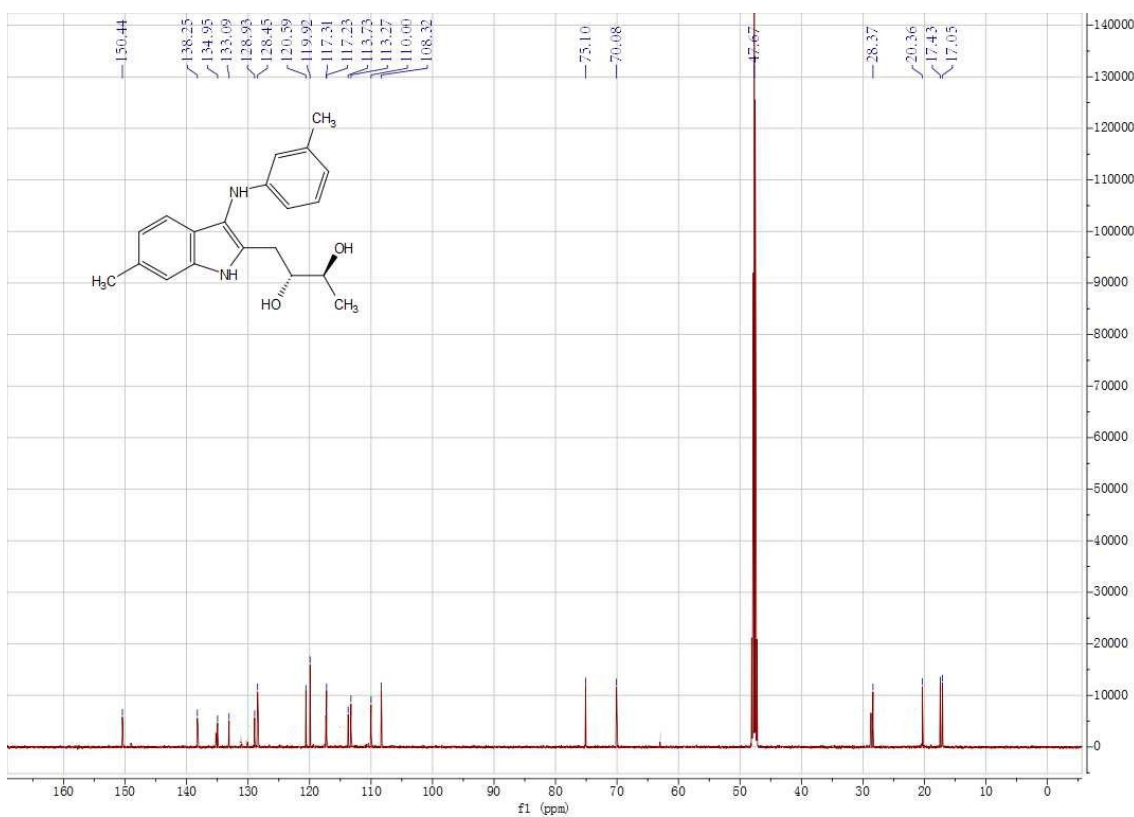

Figure. S6<sup>13</sup>C{<sup>1</sup>H} NMR of compound 3a

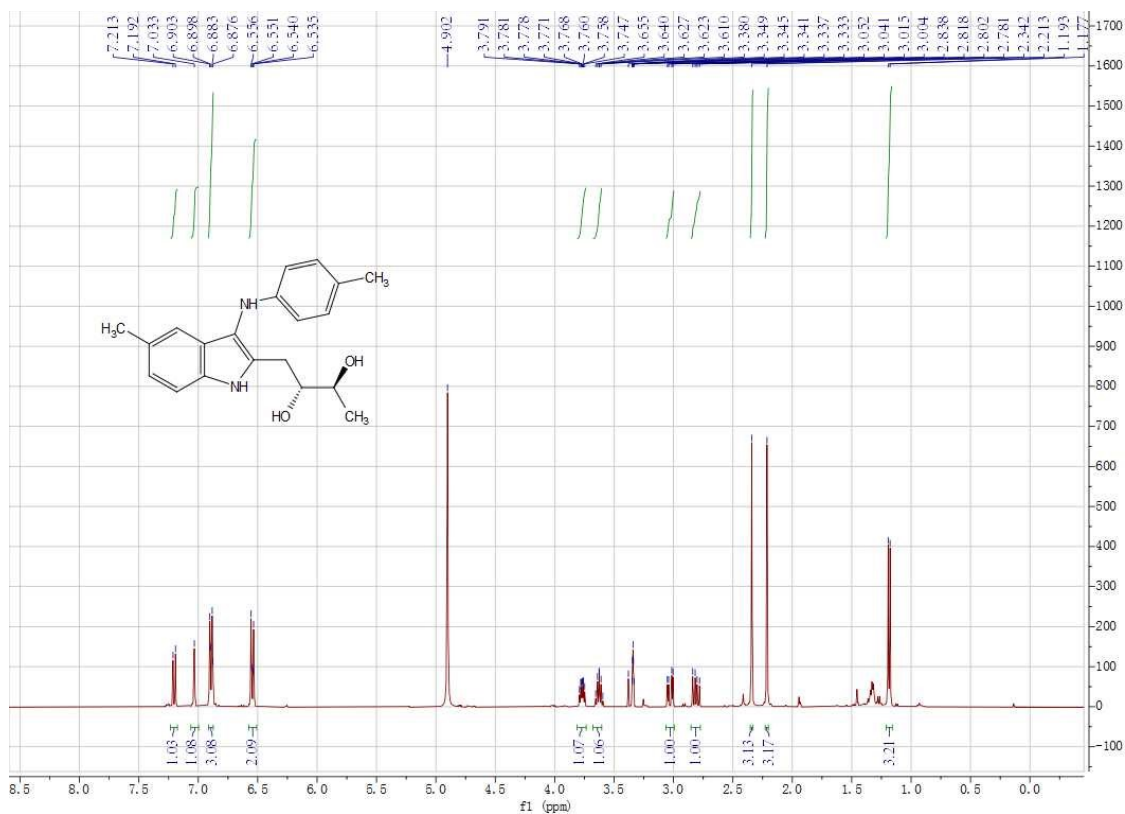

Figure.S7<sup>1</sup>H NMR of compound 4a

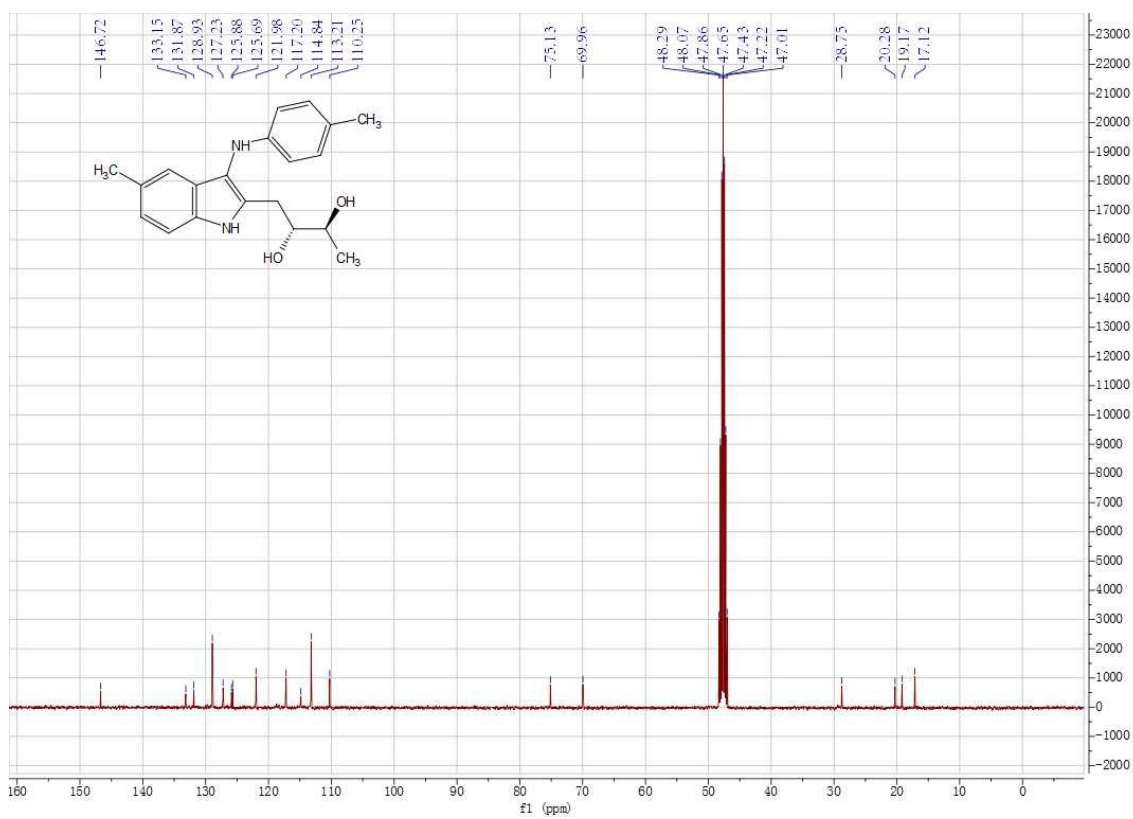

Figure.S8<sup>13</sup>C{<sup>1</sup>H} NMR of compound 4a

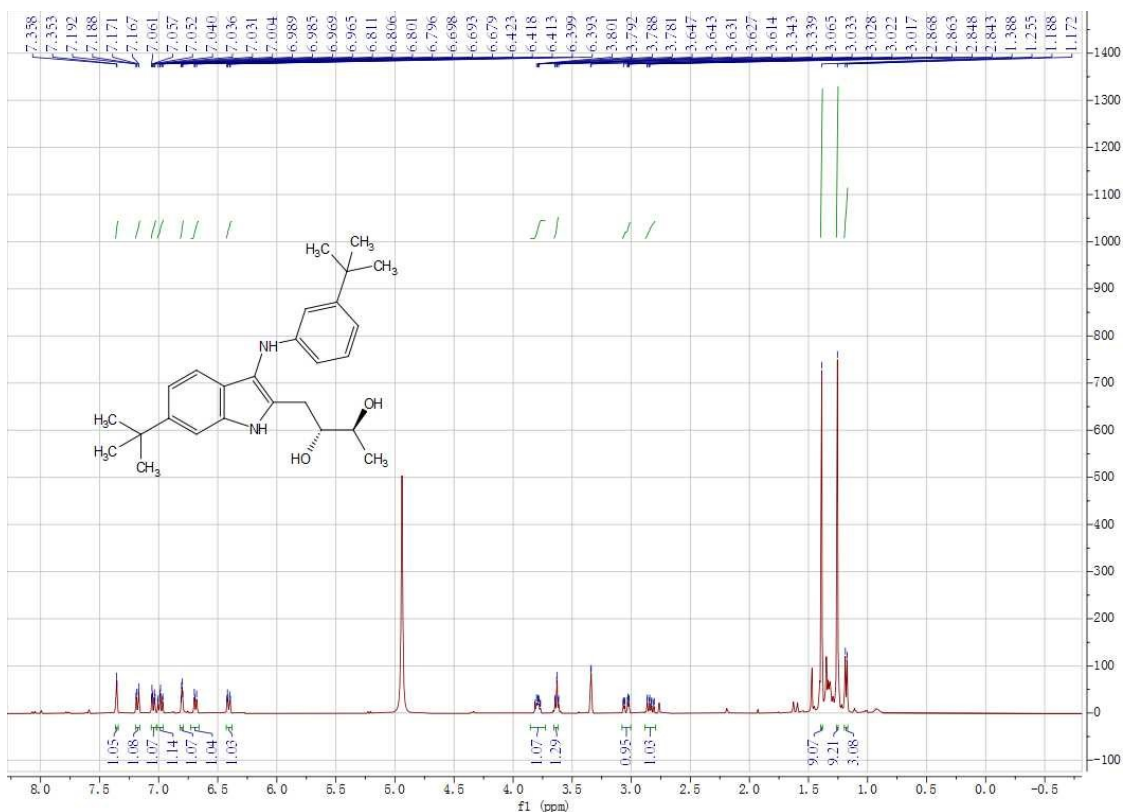

Figure.S9<sup>1</sup>H NMR of compound 5a

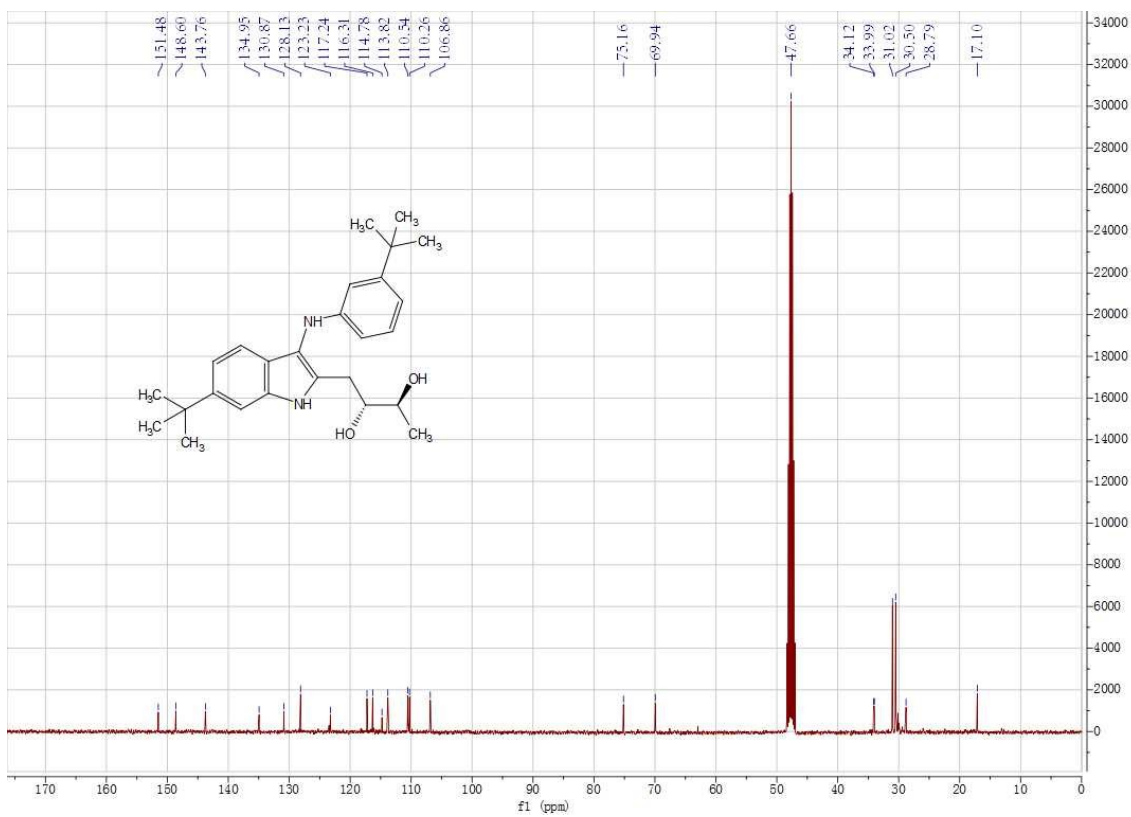

Figure. S10<sup>13</sup>C{<sup>1</sup>H} NMR of compound 5a

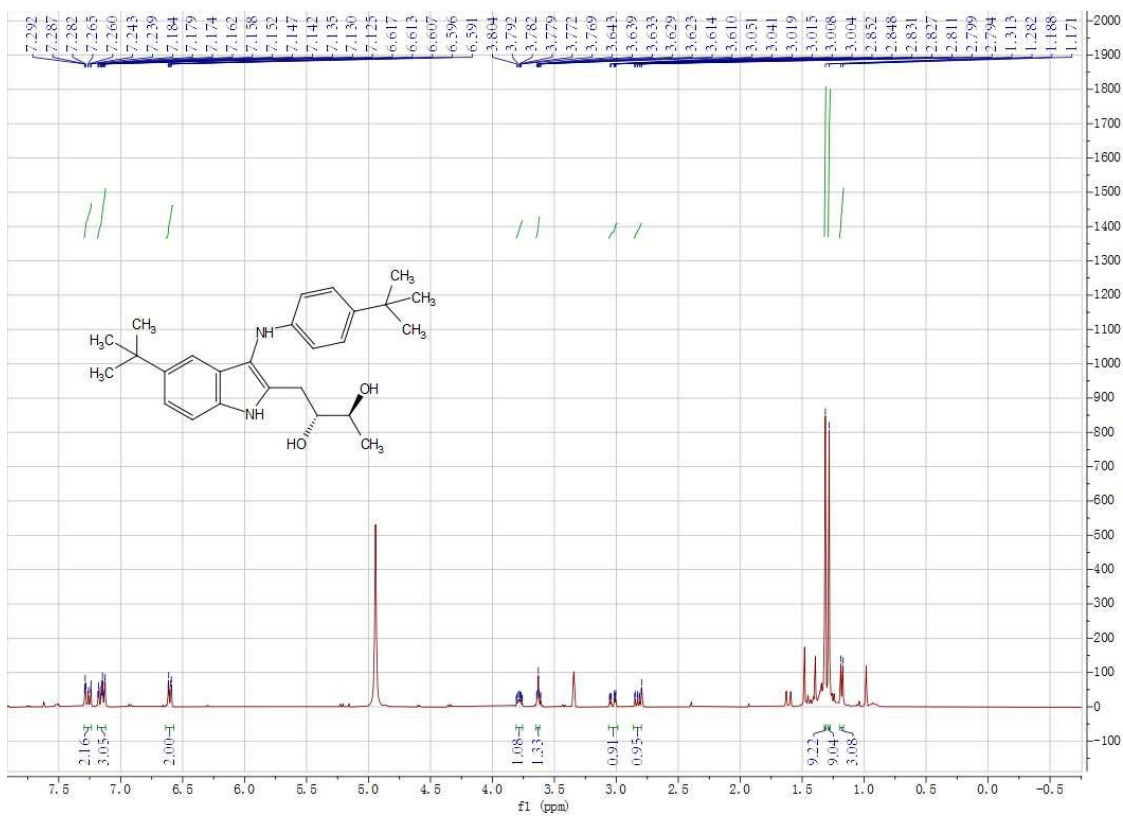

Figure. S11 <sup>1</sup>H NMR of compound 6a

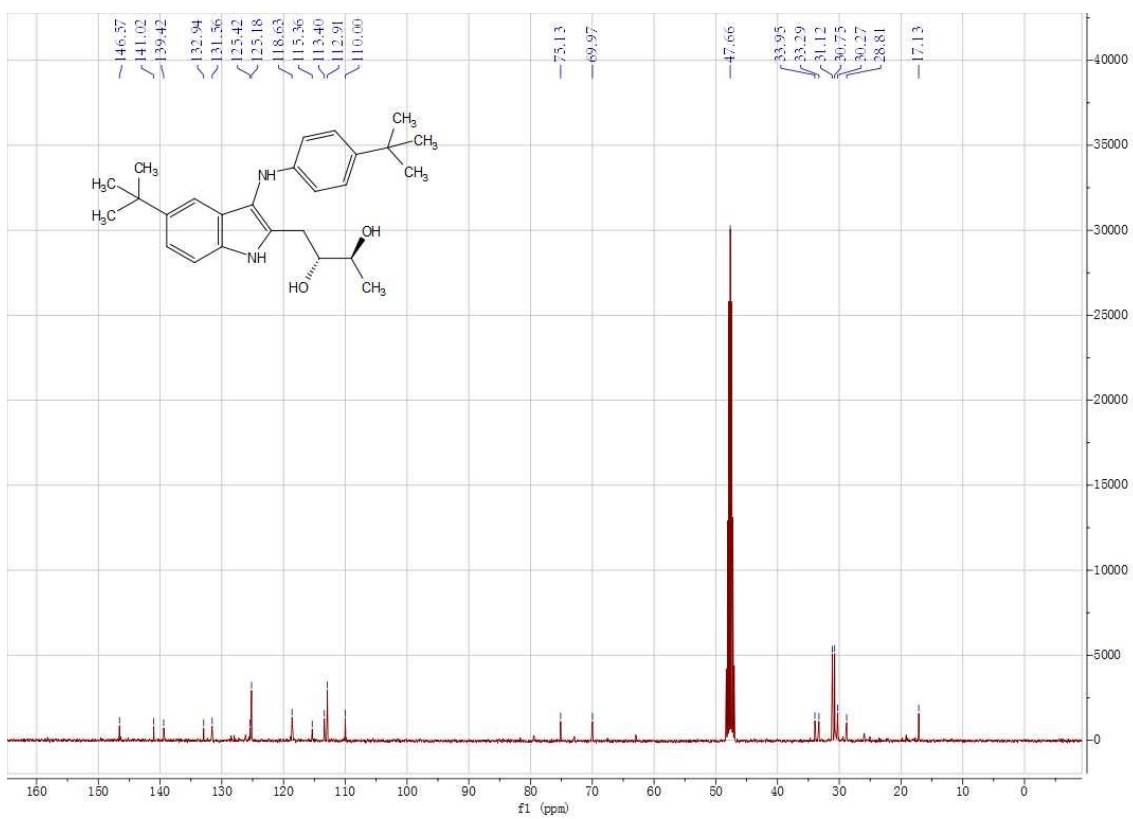

Figure. S12 <sup>13</sup>C{<sup>1</sup>H} NMR of compound 6a

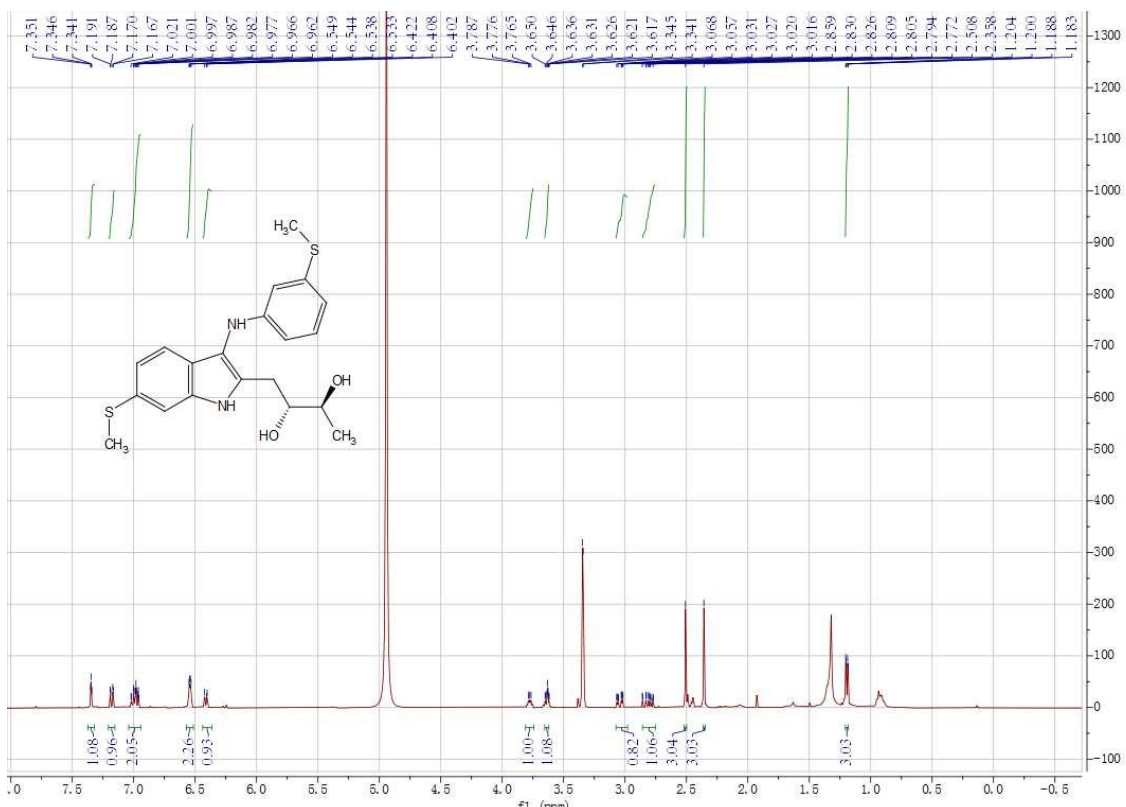

Figure. S13 $^1\text{H}$  NMR of compound 7a

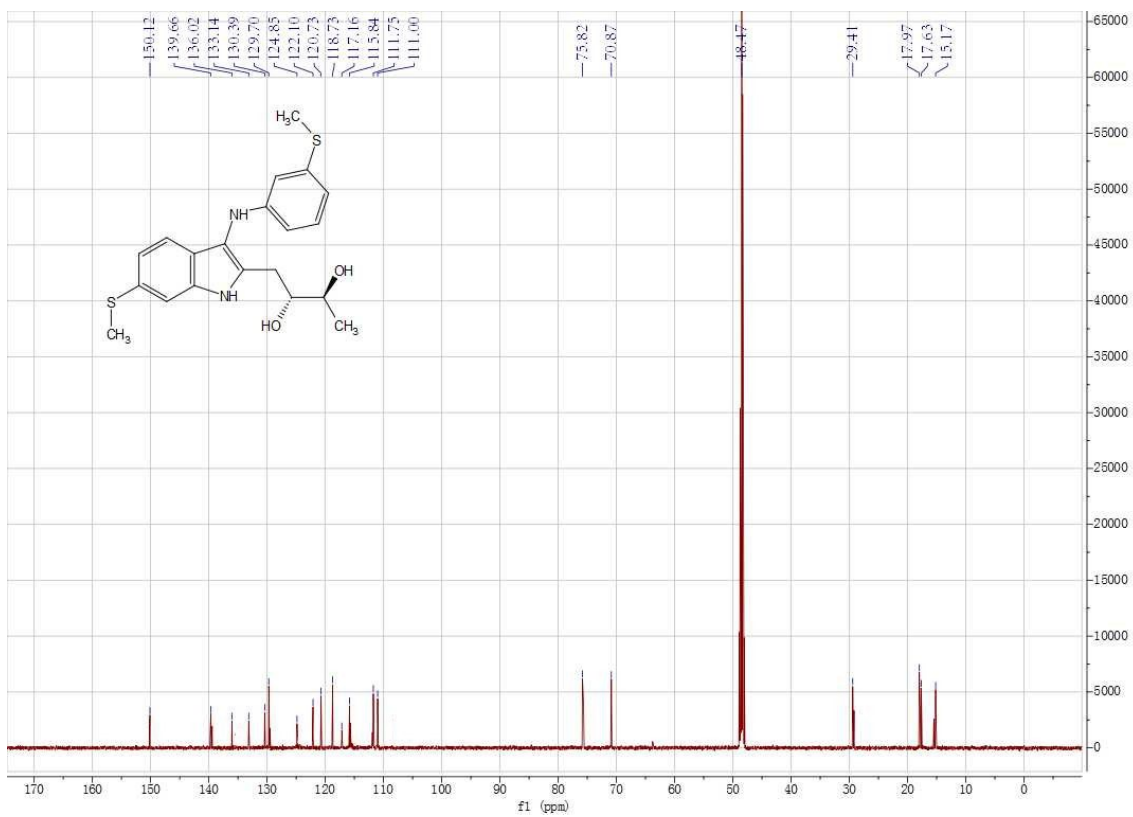

Figure. S14 $^{13}\text{C}\{^1\text{H}\}$  NMR of compound 7a

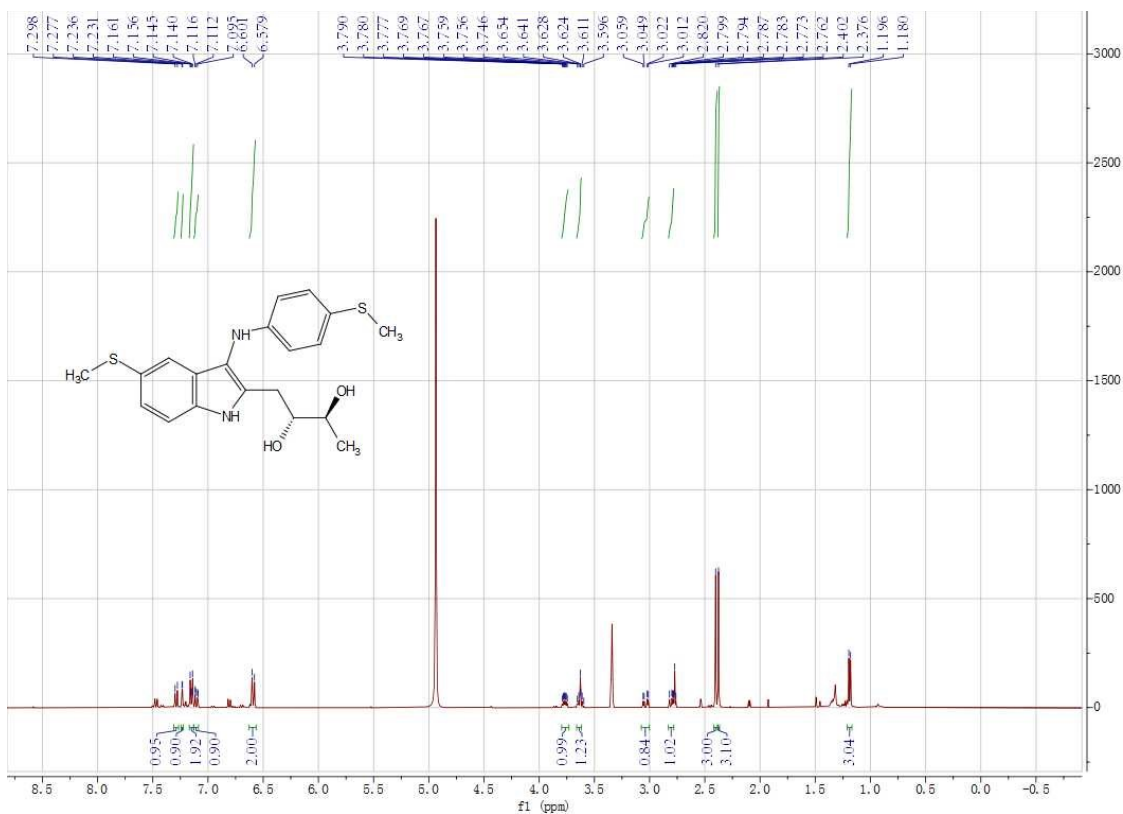

Figure. S15<sup>1</sup>H NMR of compound 8a

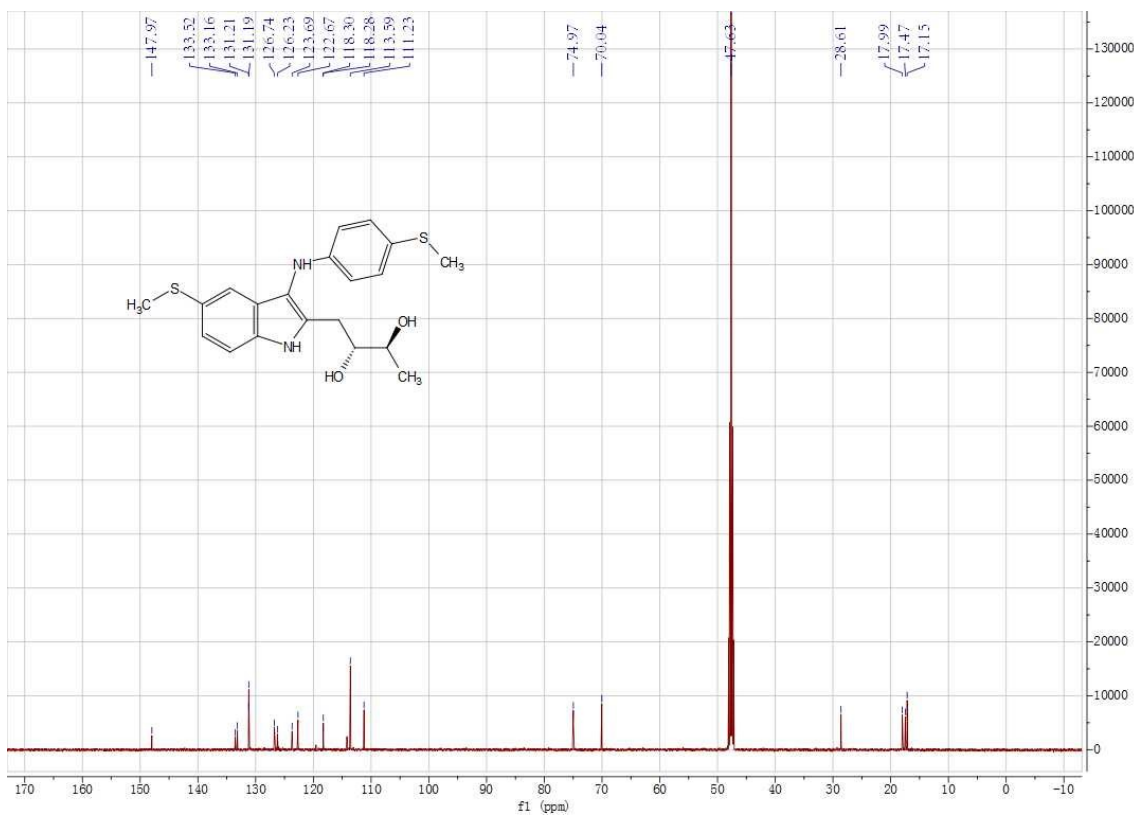

Figure. S16<sup>13</sup>C{<sup>1</sup>H} NMR of compound 8a



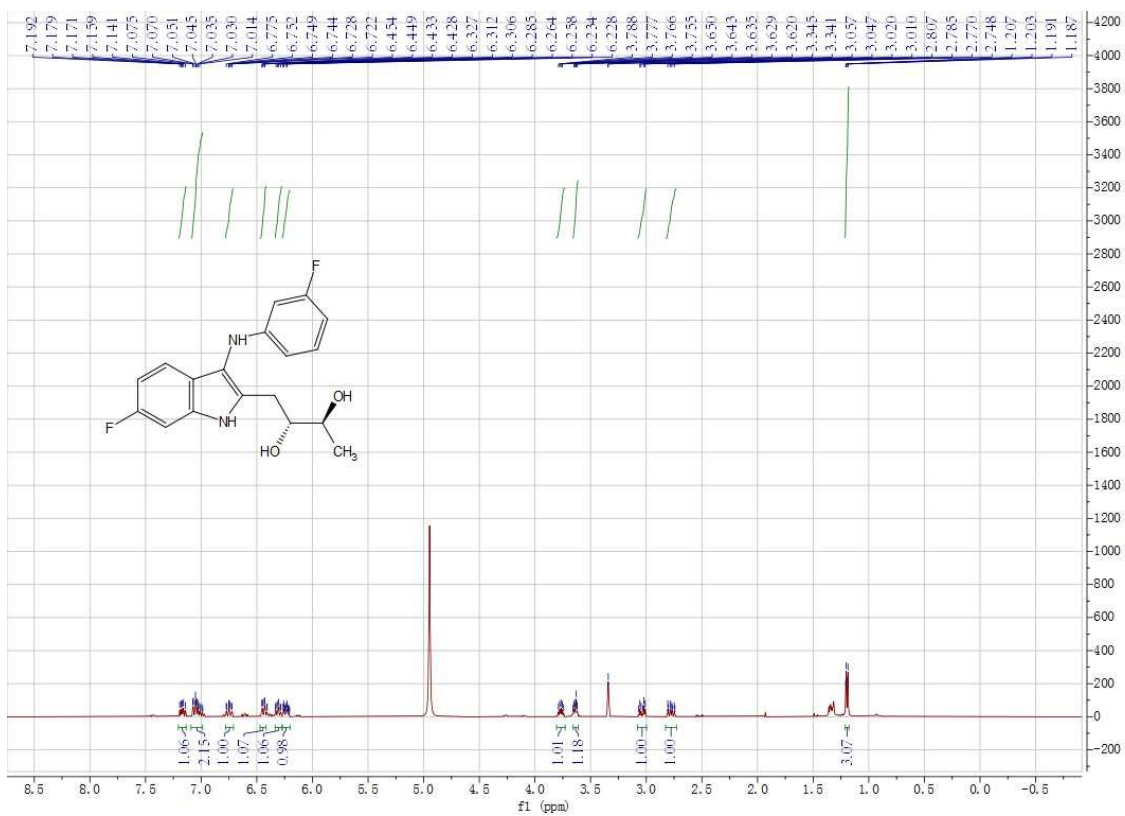

Figure. S17  $^1\text{H}$  NMR of compound 9a

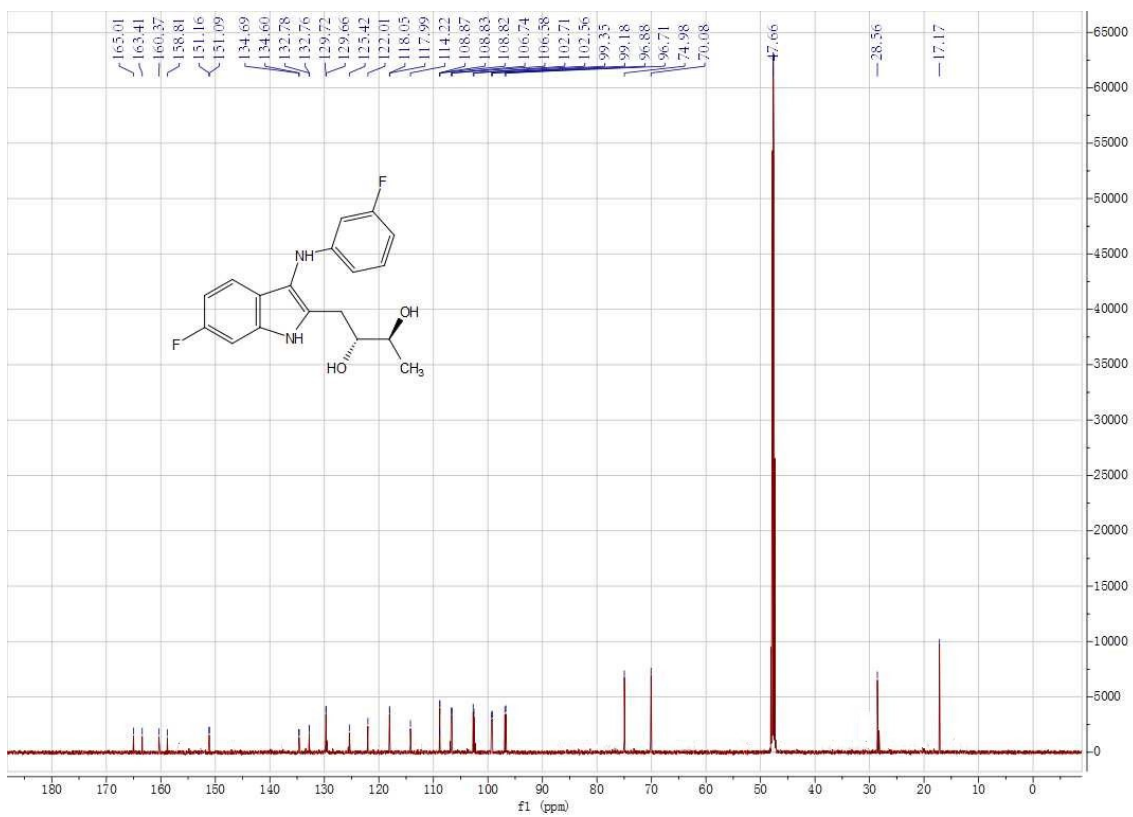

Figure. S18  $^{13}\text{C}\{^1\text{H}\}$  NMR of compound 9a

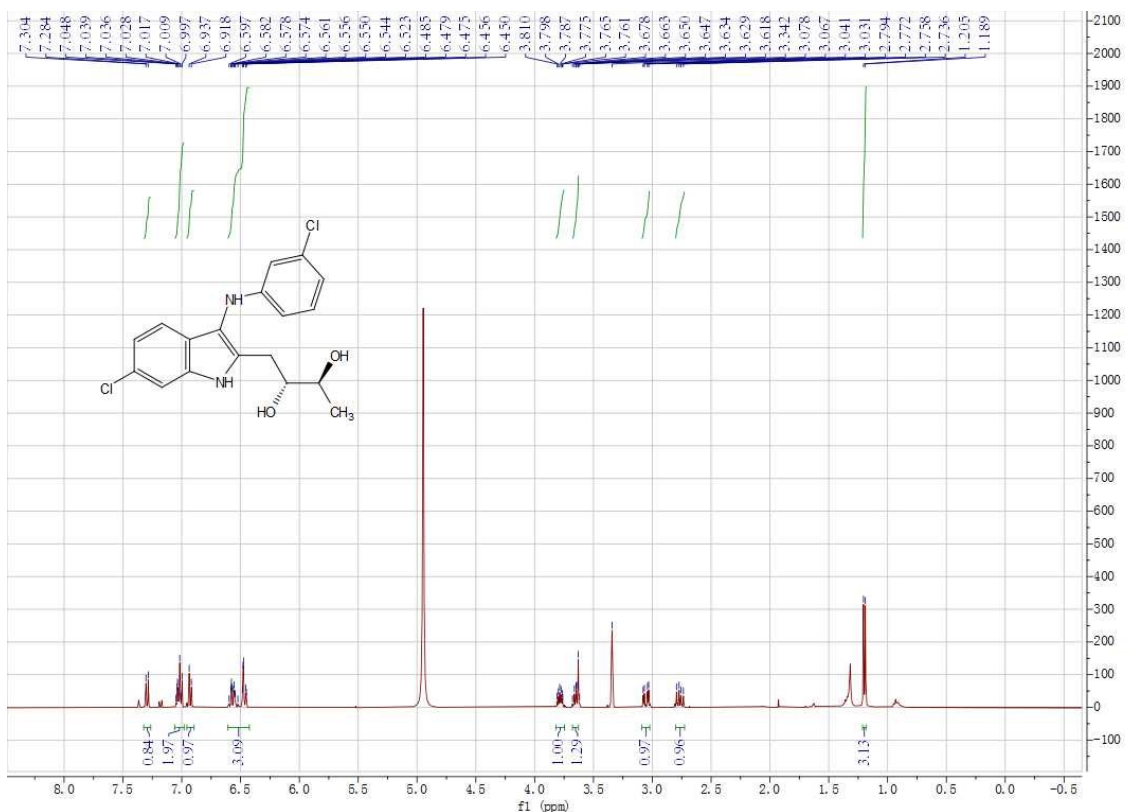

Figure. S19<sup>1</sup>H NMR of compound 10a

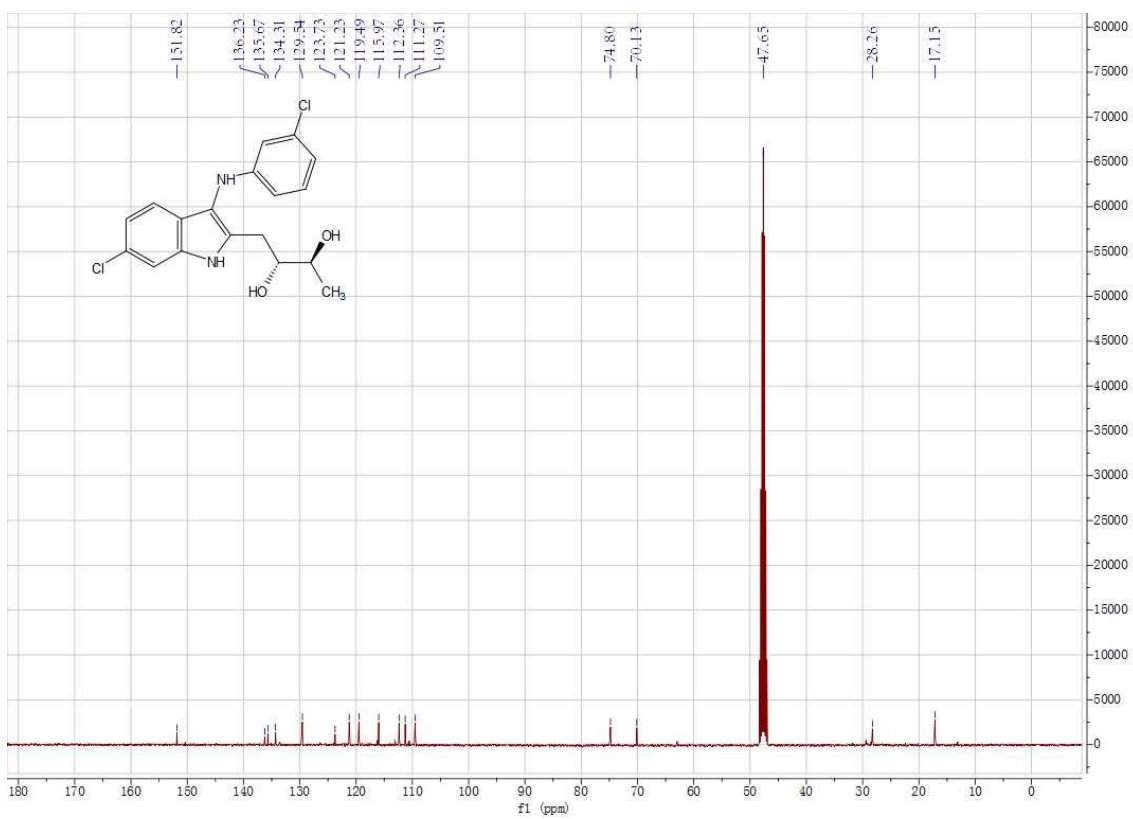

Figure. S20<sup>13</sup>C {<sup>1</sup>H} NMR of compound 10a

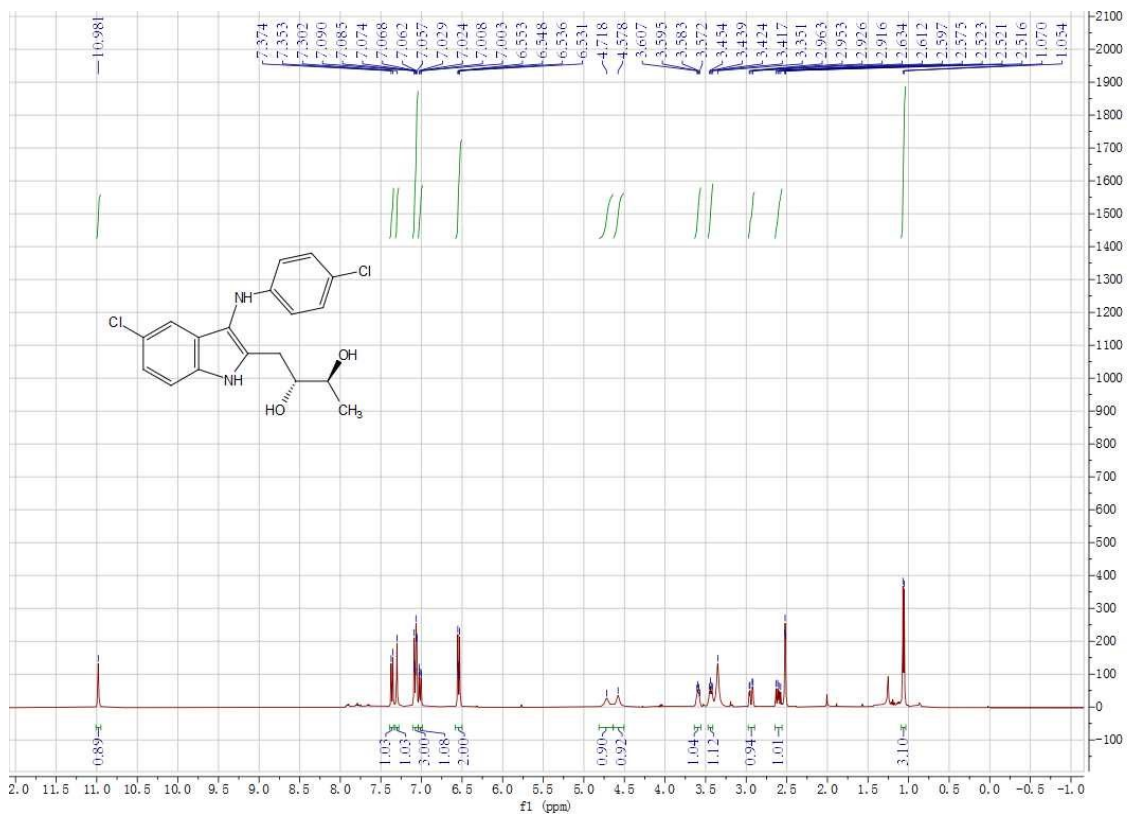

Figure. S21  $^1\text{H}$  NMR of compound 11a

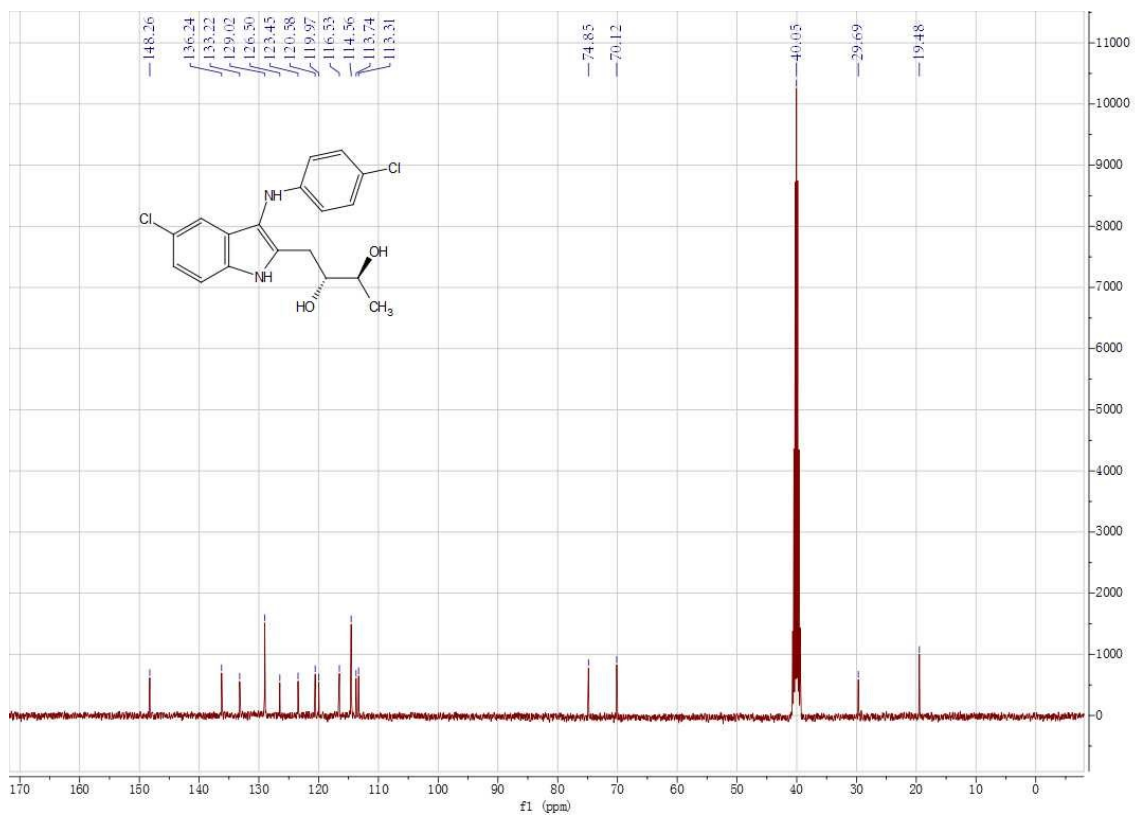

Figure. S22  $^{13}\text{C}\{^1\text{H}\}$  NMR of compound 11a

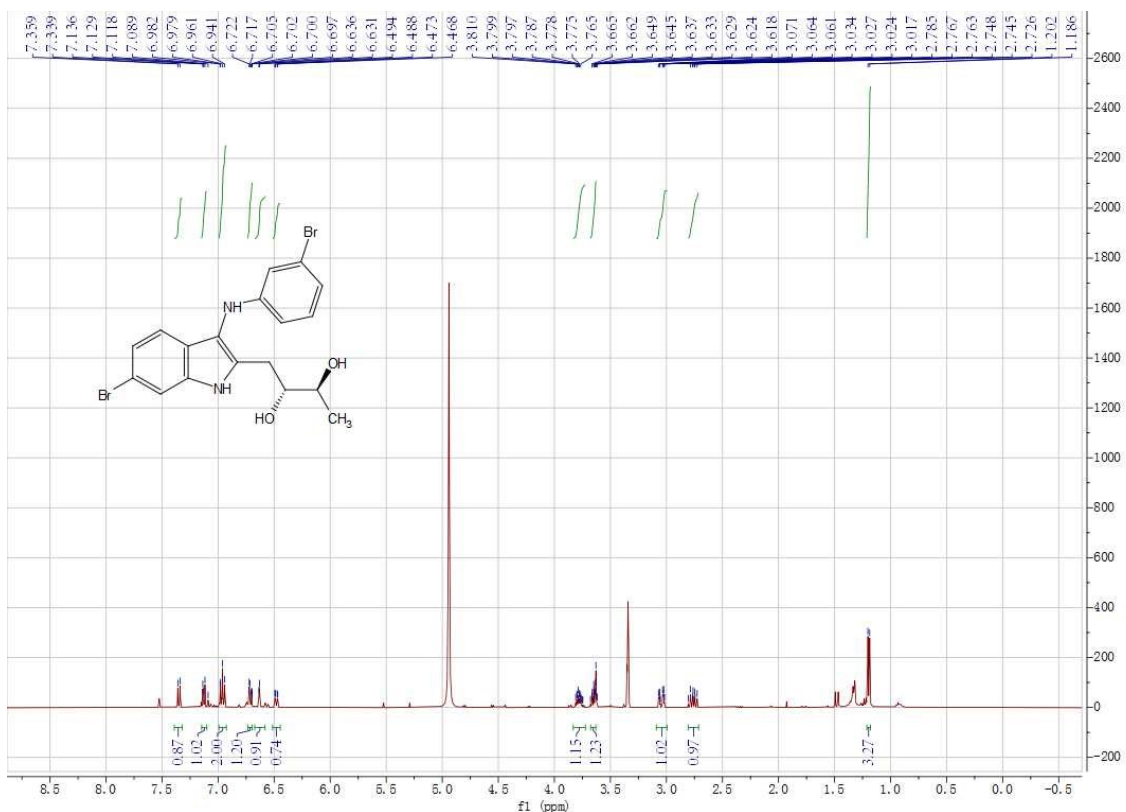

Figure. S23  $^1\text{H}$  NMR of compound 12a

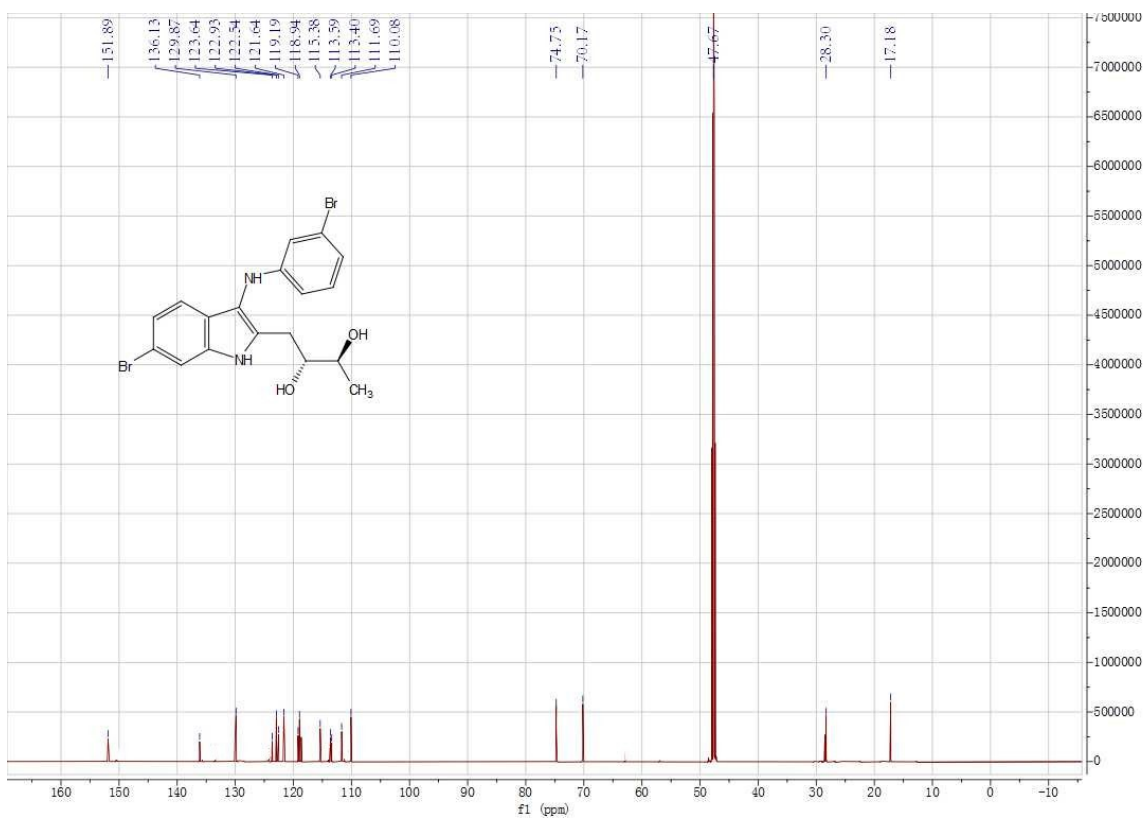

Figure. S24  $^{13}\text{C}\{^1\text{H}\}$  NMR of compound 12a

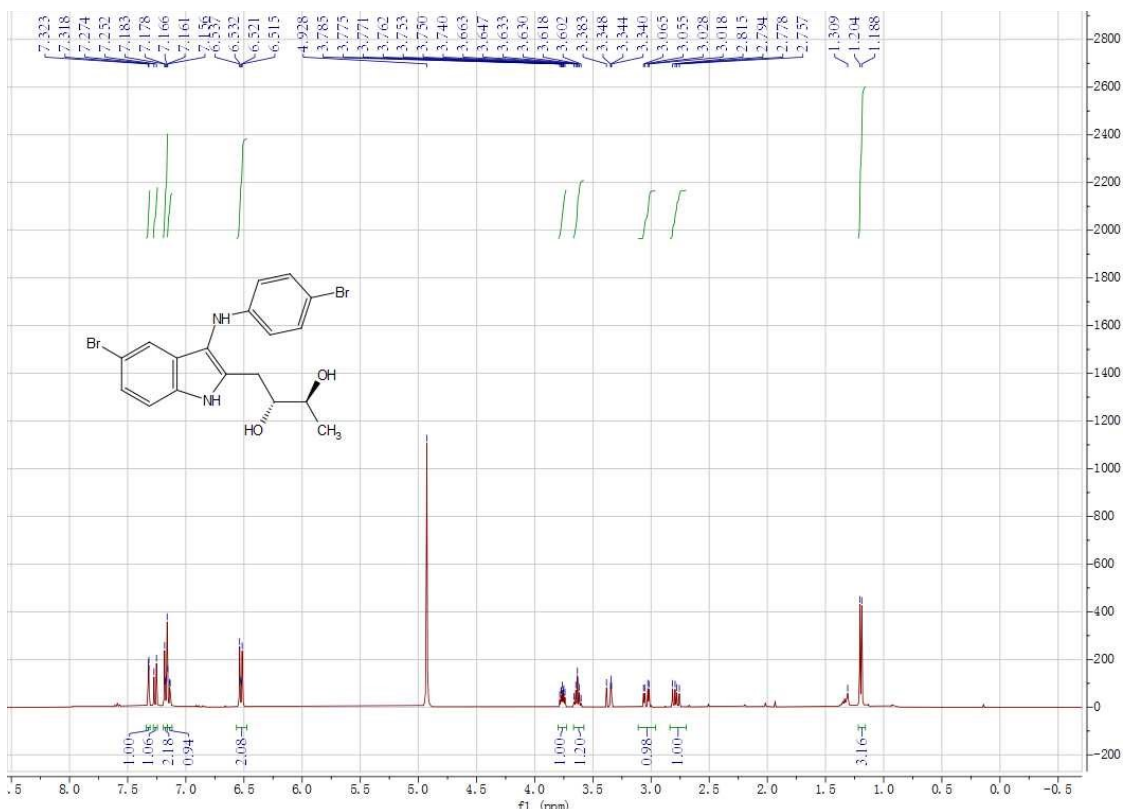

Figure. S25<sup>1</sup>H NMR of compound 13a

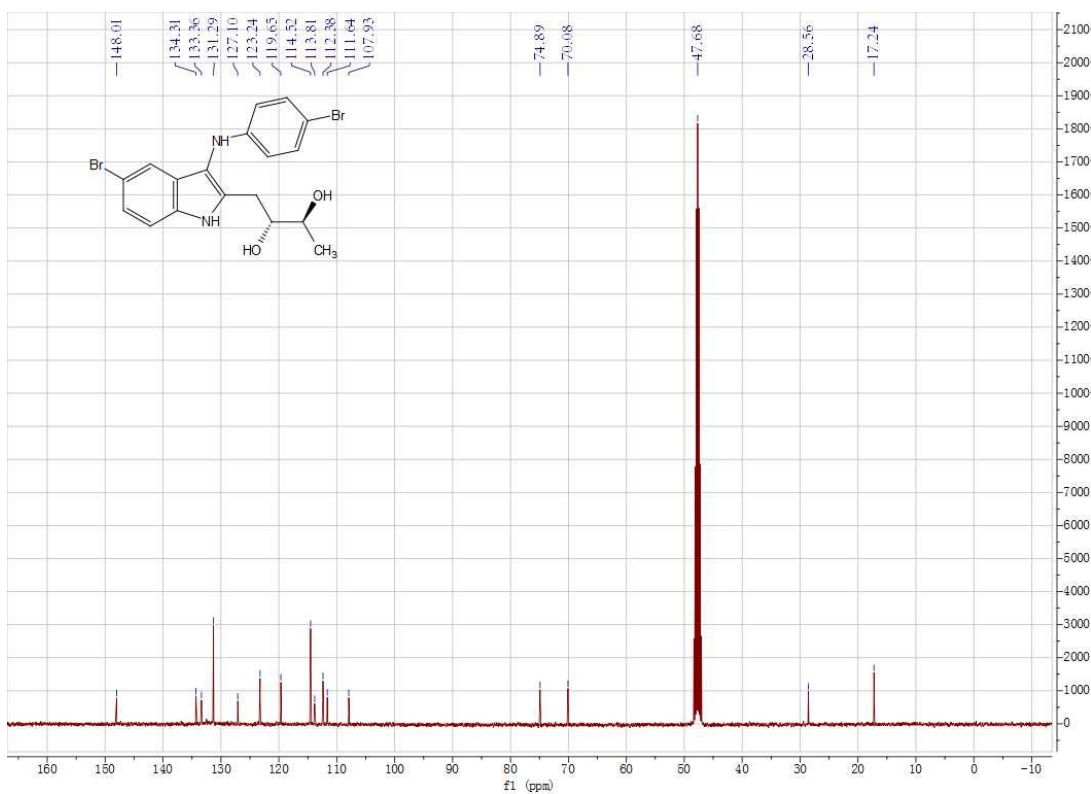

Figure. S26<sup>13</sup>C {<sup>1</sup>H} NMR of compound 13a

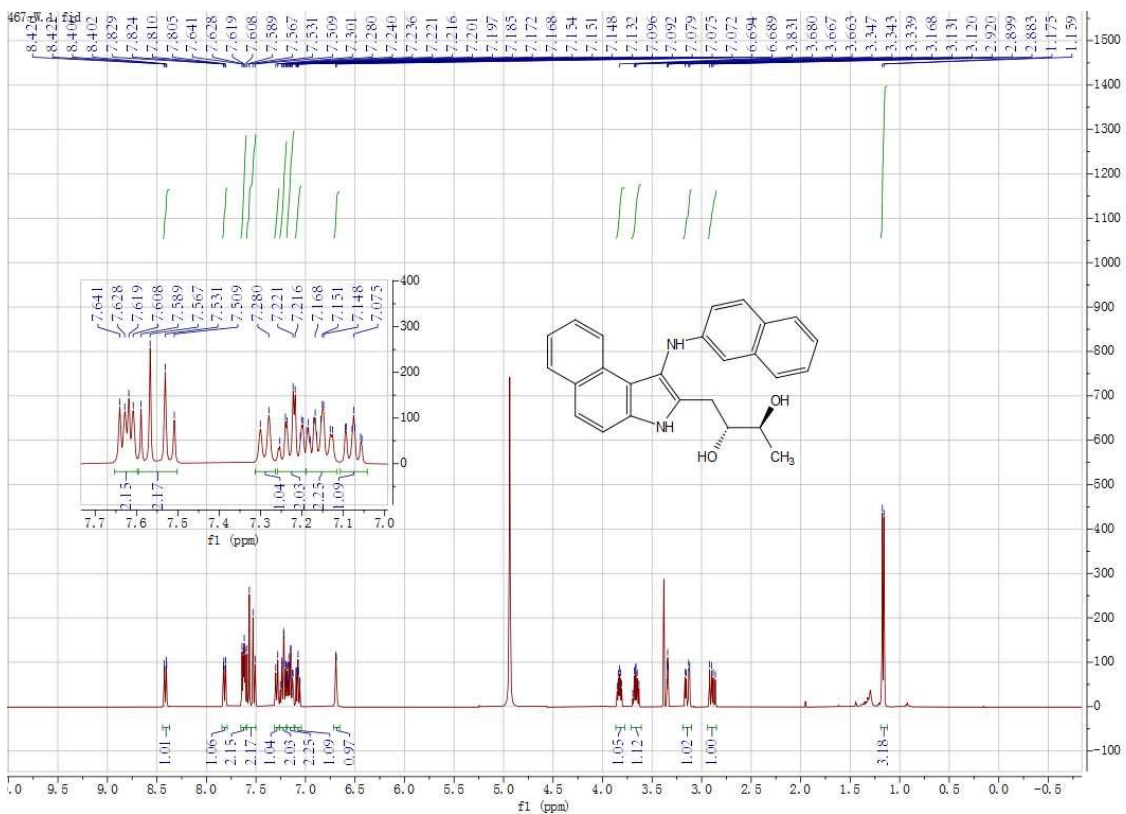

Figure. S27<sup>1</sup>H NMR of compound 14a

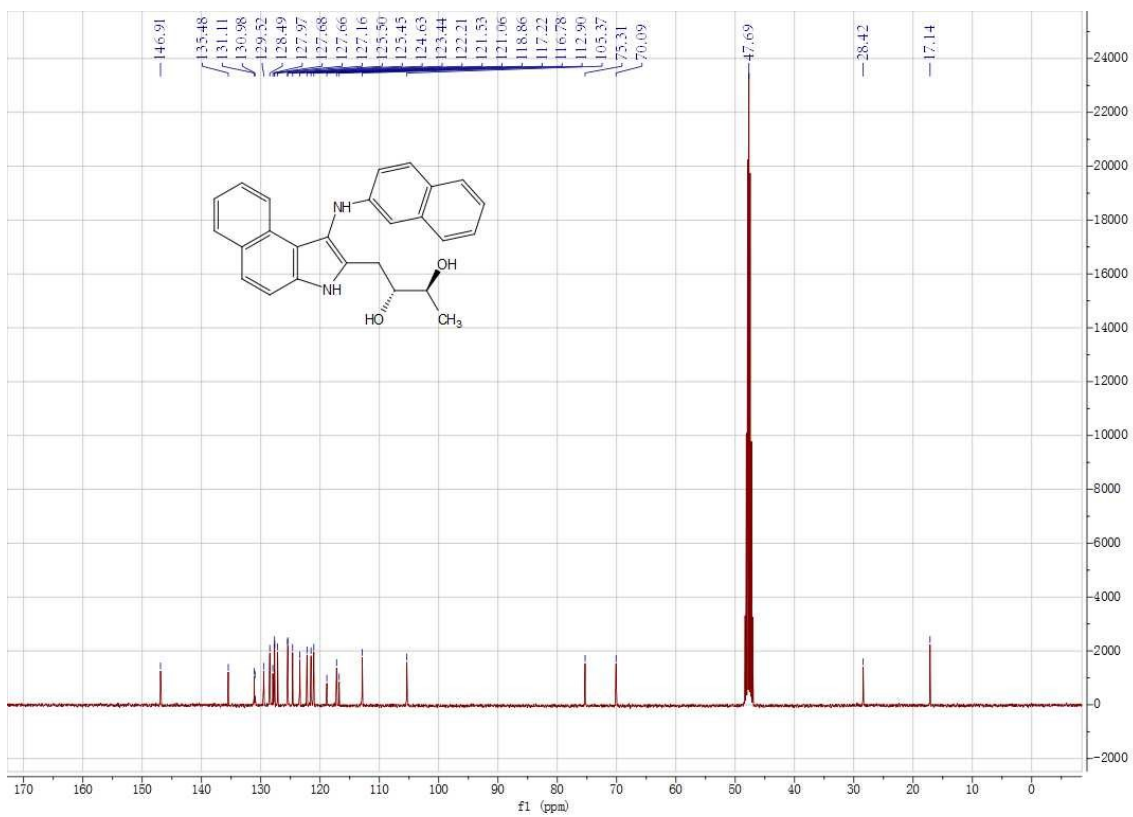

Figure. S28<sup>13</sup>C{<sup>1</sup>H} NMR of compound 14a

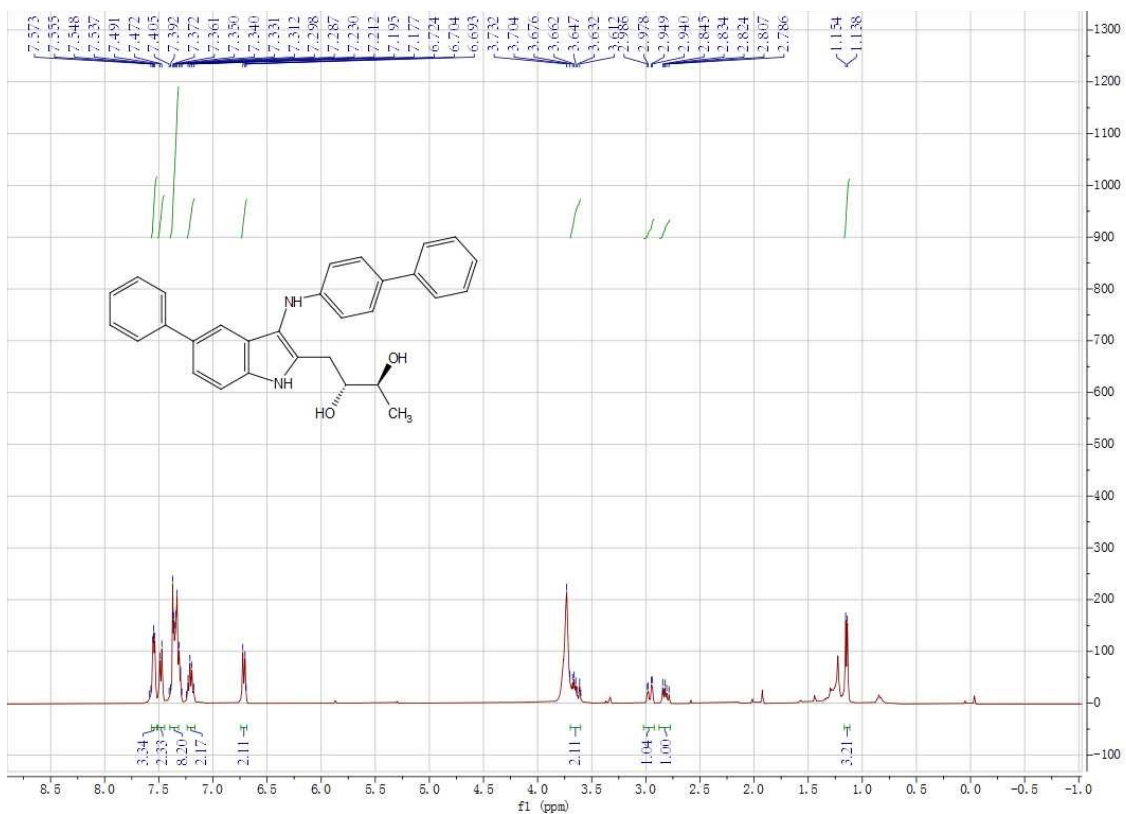

Figure. S29<sup>1</sup>H NMR of compound 15a

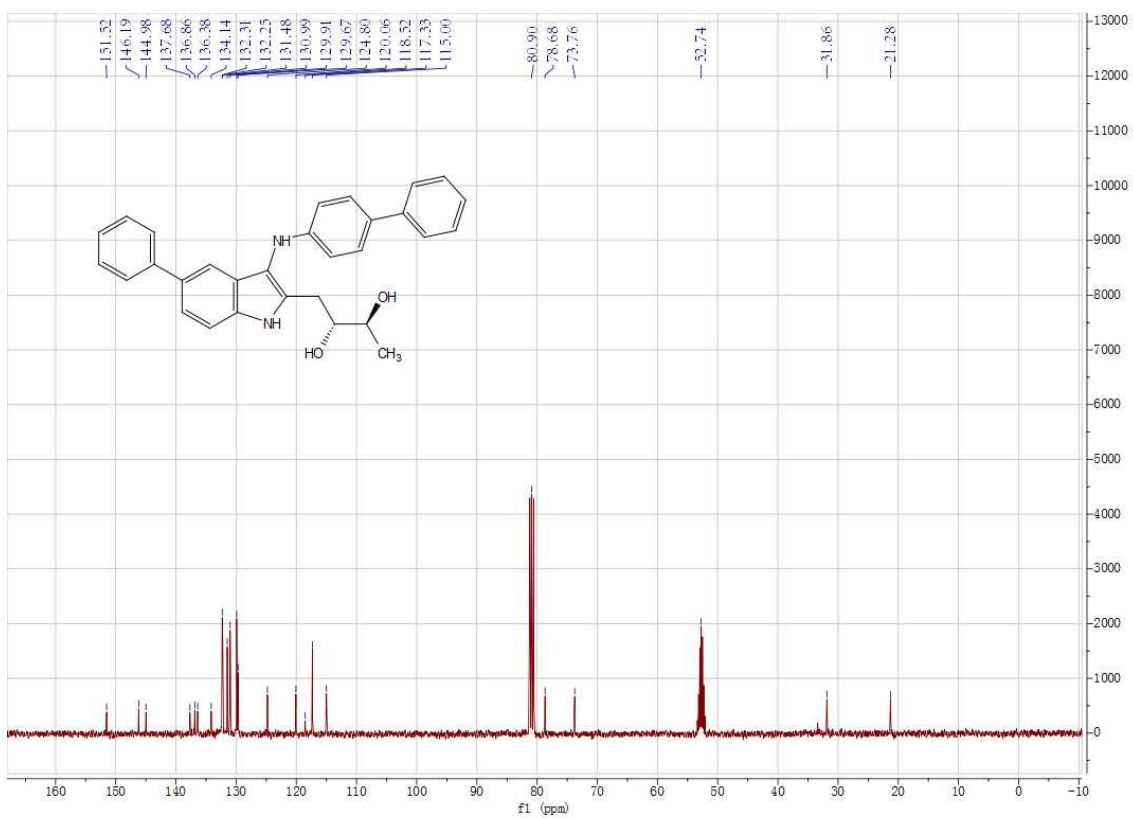

Figure. S30<sup>13</sup>C {<sup>1</sup>H} NMR of compound 15a

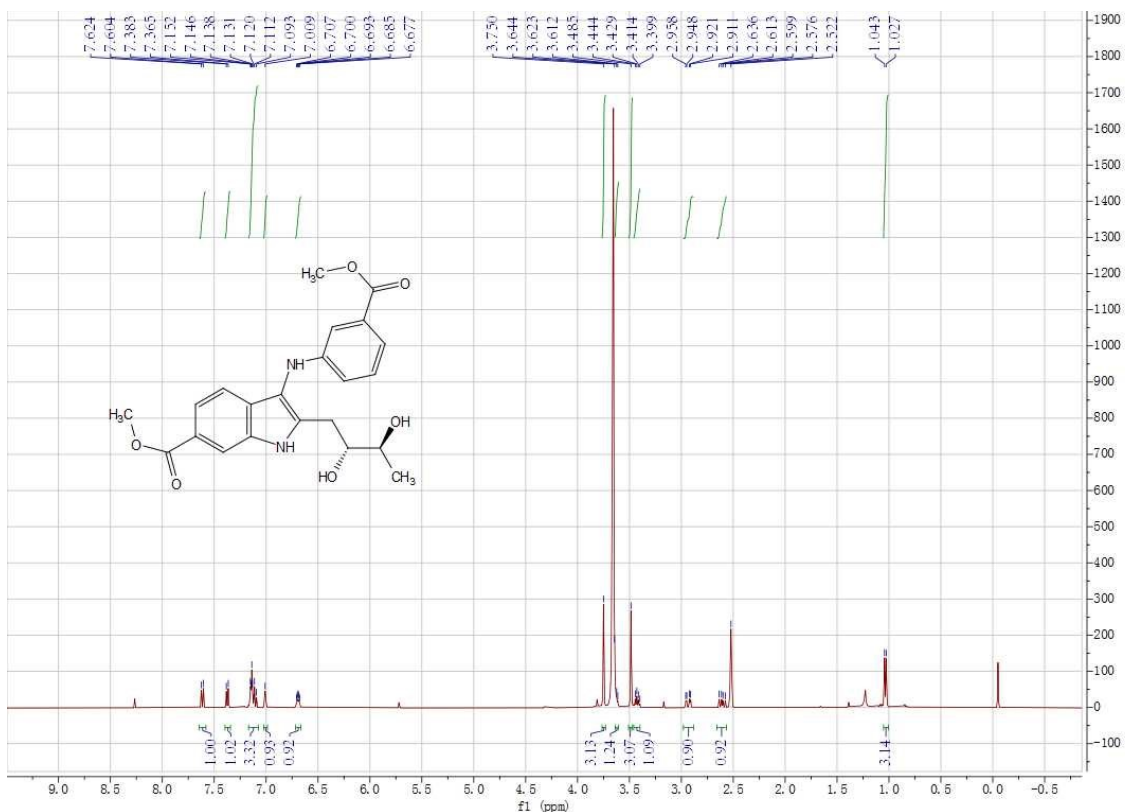

Figure. S31  $^1\text{H}$  NMR of compound 16a

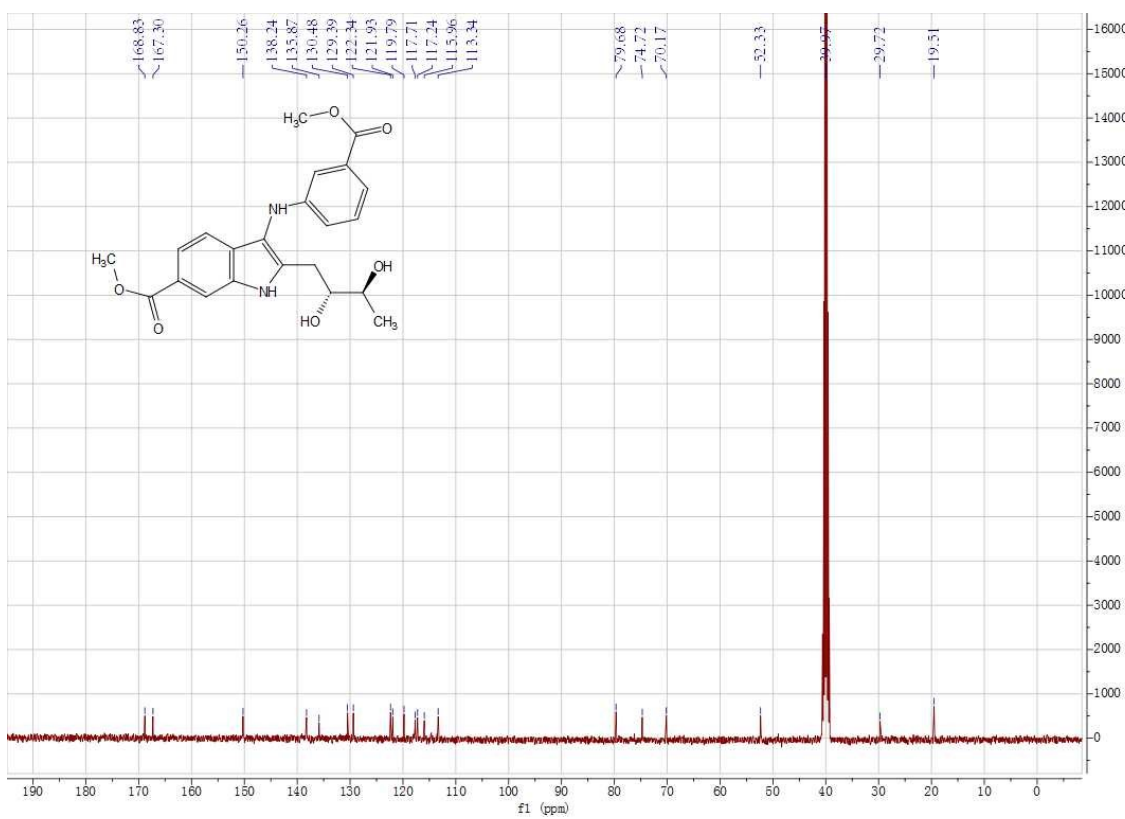

Figure. S32  $^{13}\text{C}\{^1\text{H}\}$  NMR of compound 16a



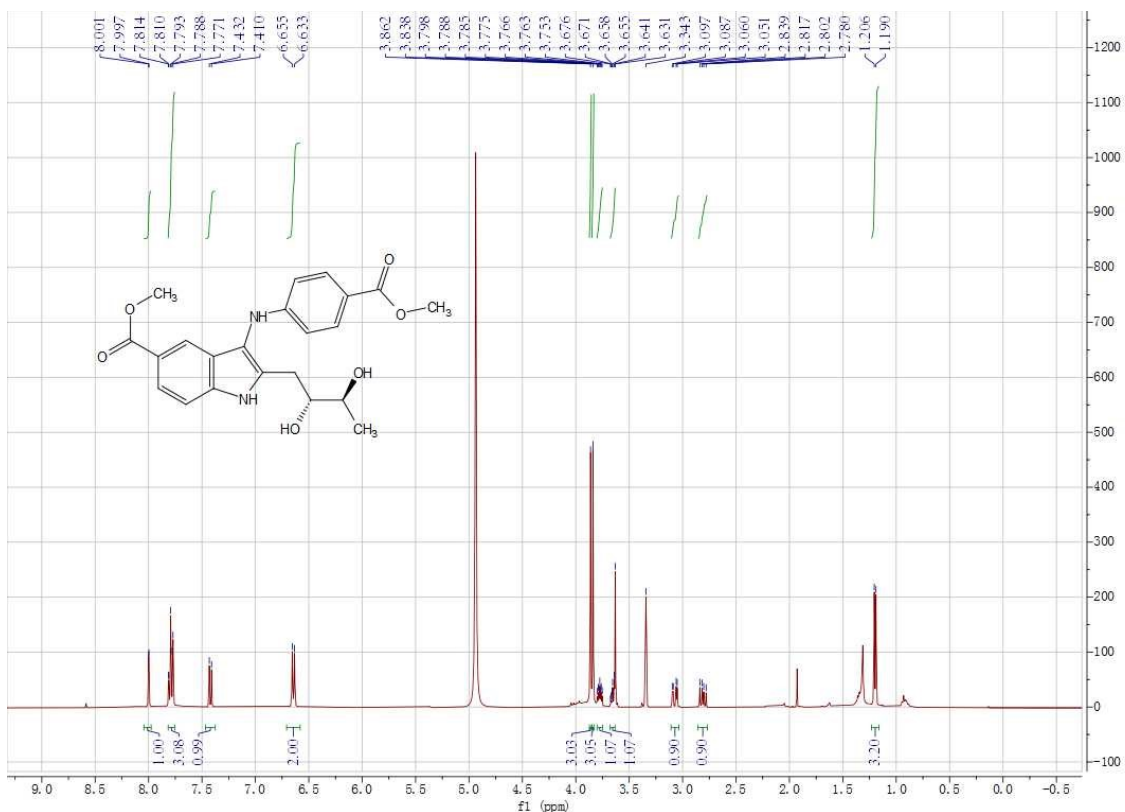

Figure. S33  $^1\text{H}$  NMR of compound 17a

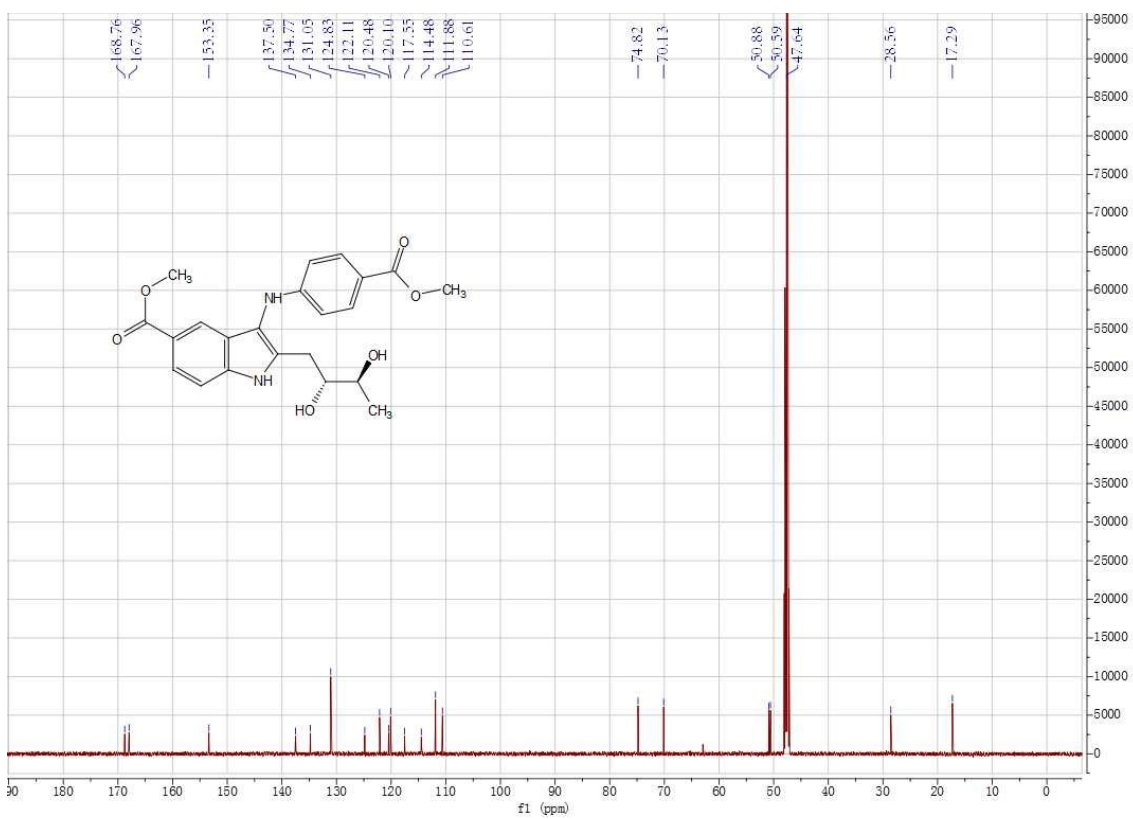

Figure. S34  $^{13}\text{C}\{^1\text{H}\}$  NMR of compound 17a

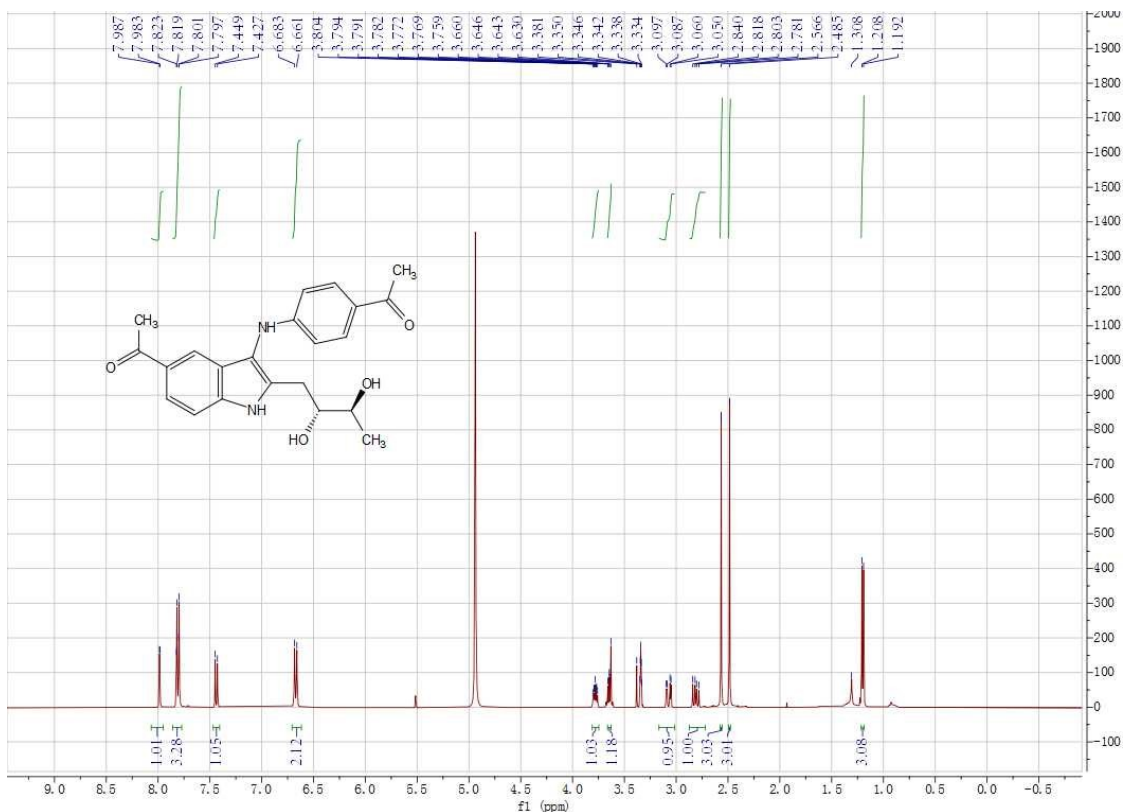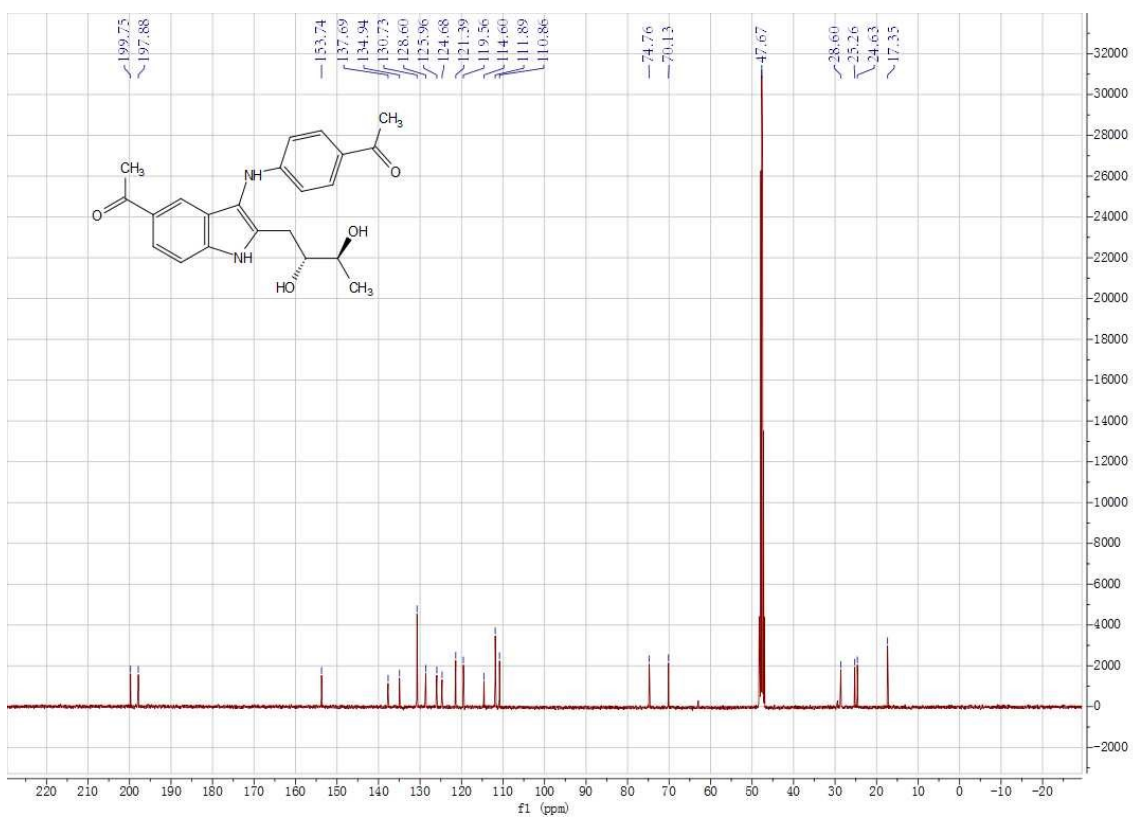

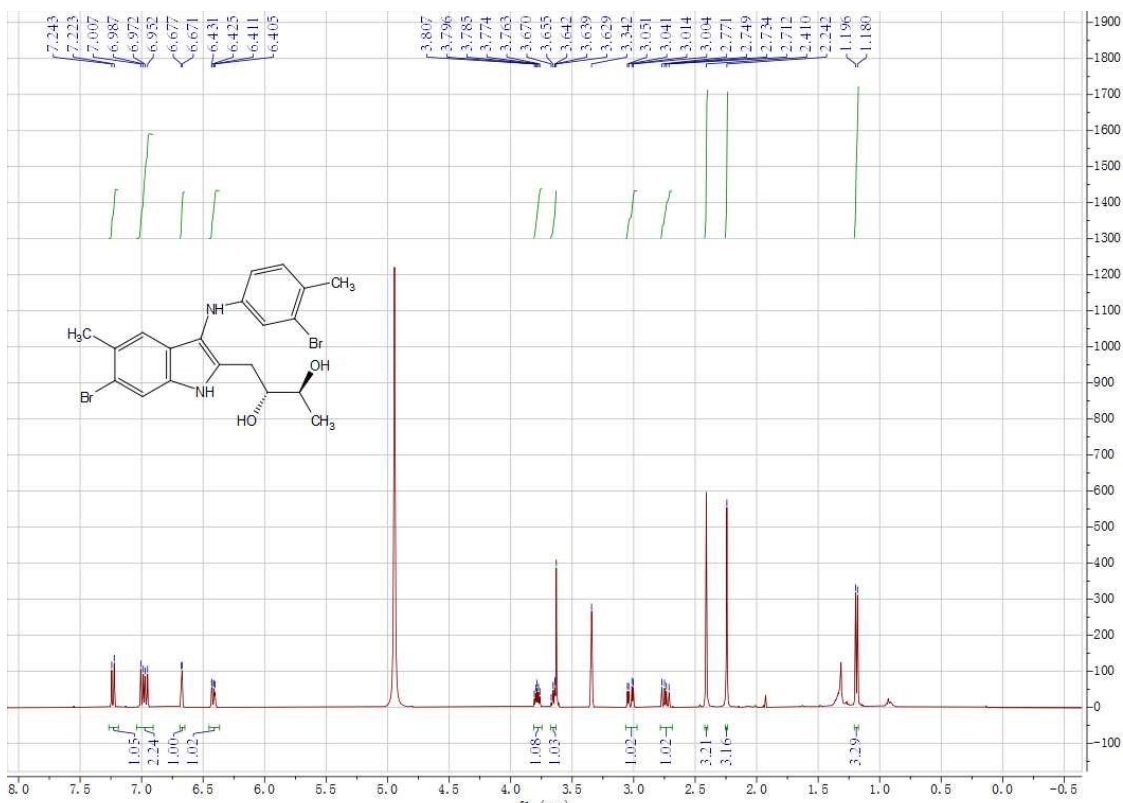

Figure. S37<sup>1</sup>H NMR of compound 19a

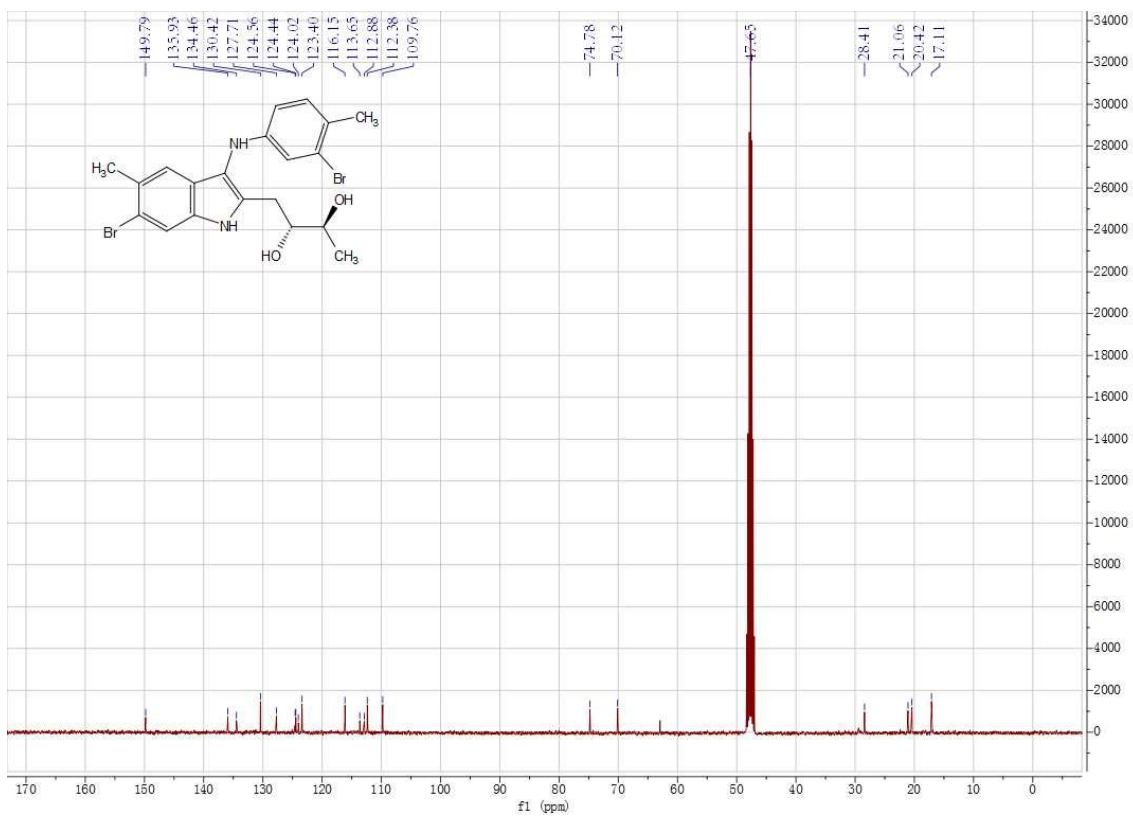

Figure. S38<sup>13</sup>C{<sup>1</sup>H} NMR of compound 19a

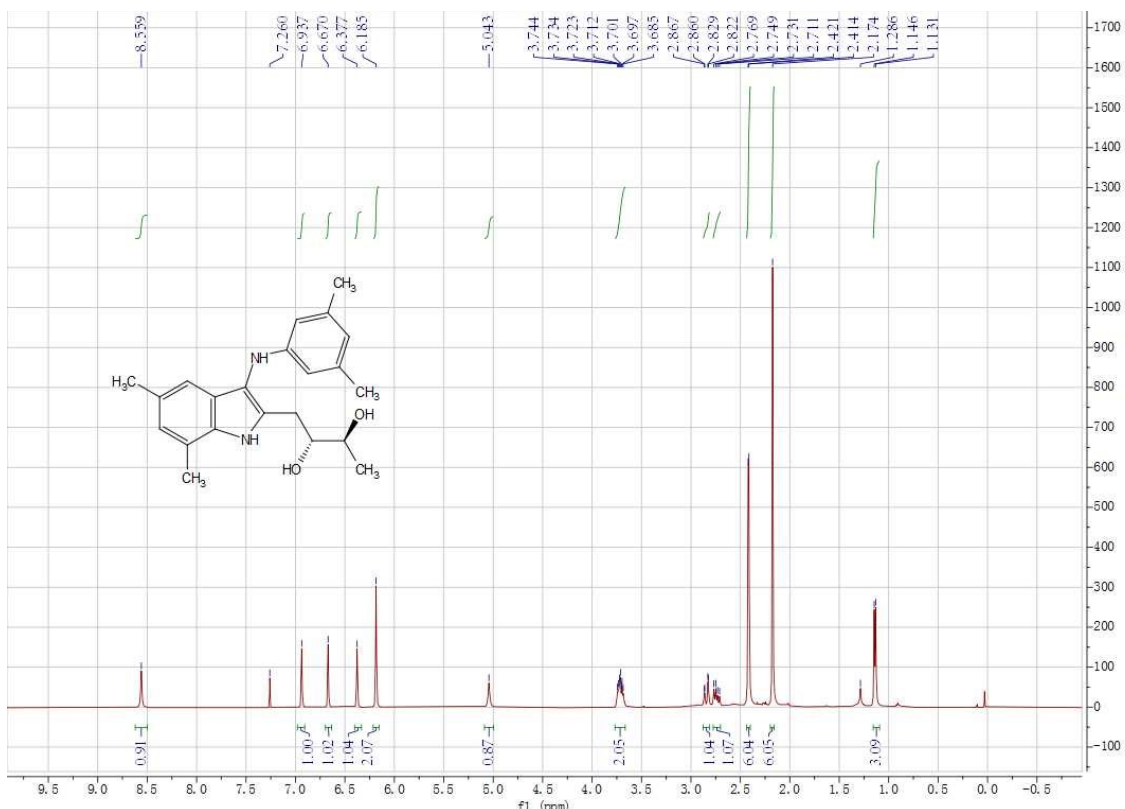

Figure. S39<sup>1</sup>H NMR of compound 20a

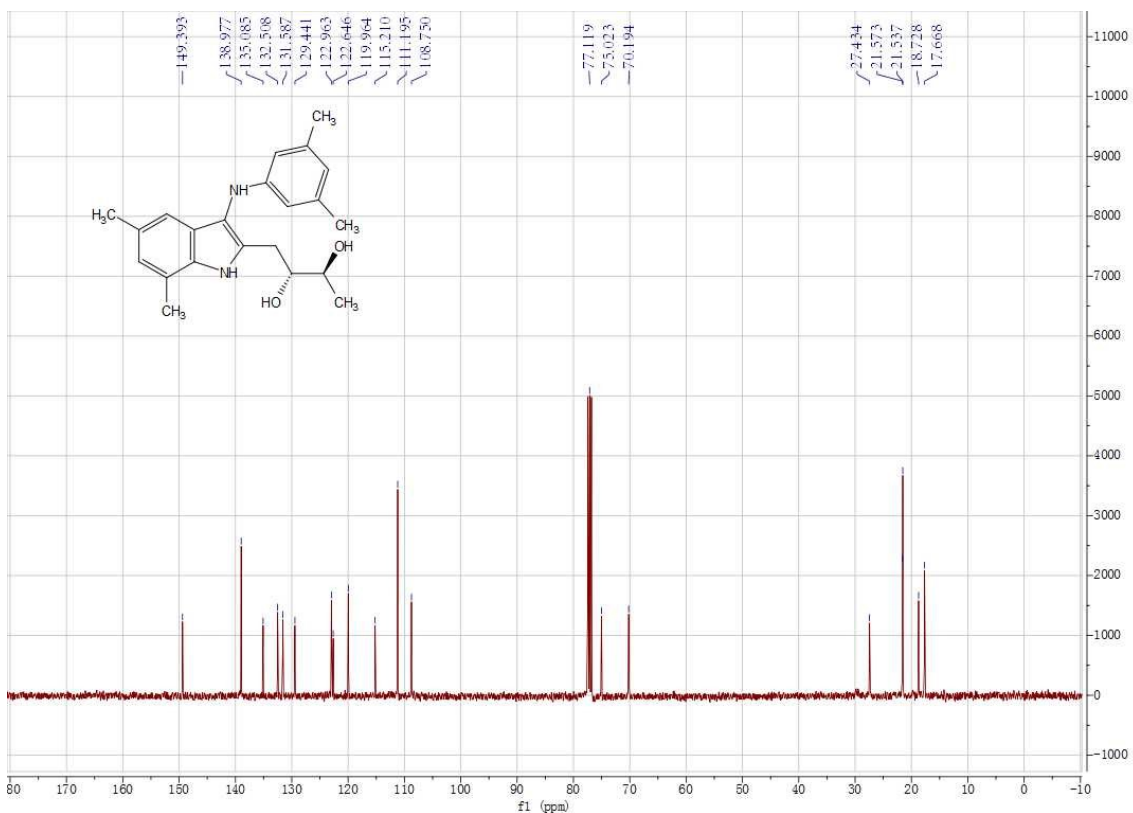

Figure. S40<sup>13</sup>C{<sup>1</sup>H} NMR of compound 20a

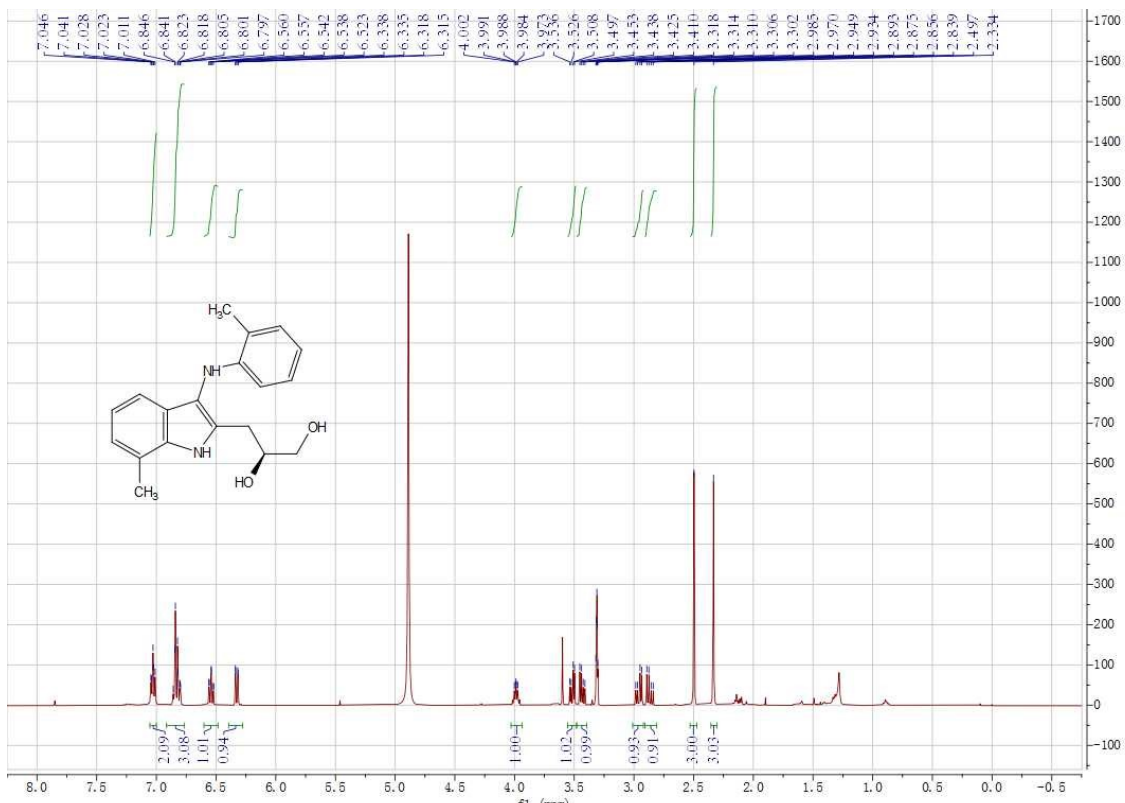

Figure. S41 <sup>1</sup>H NMR of compound **1b**

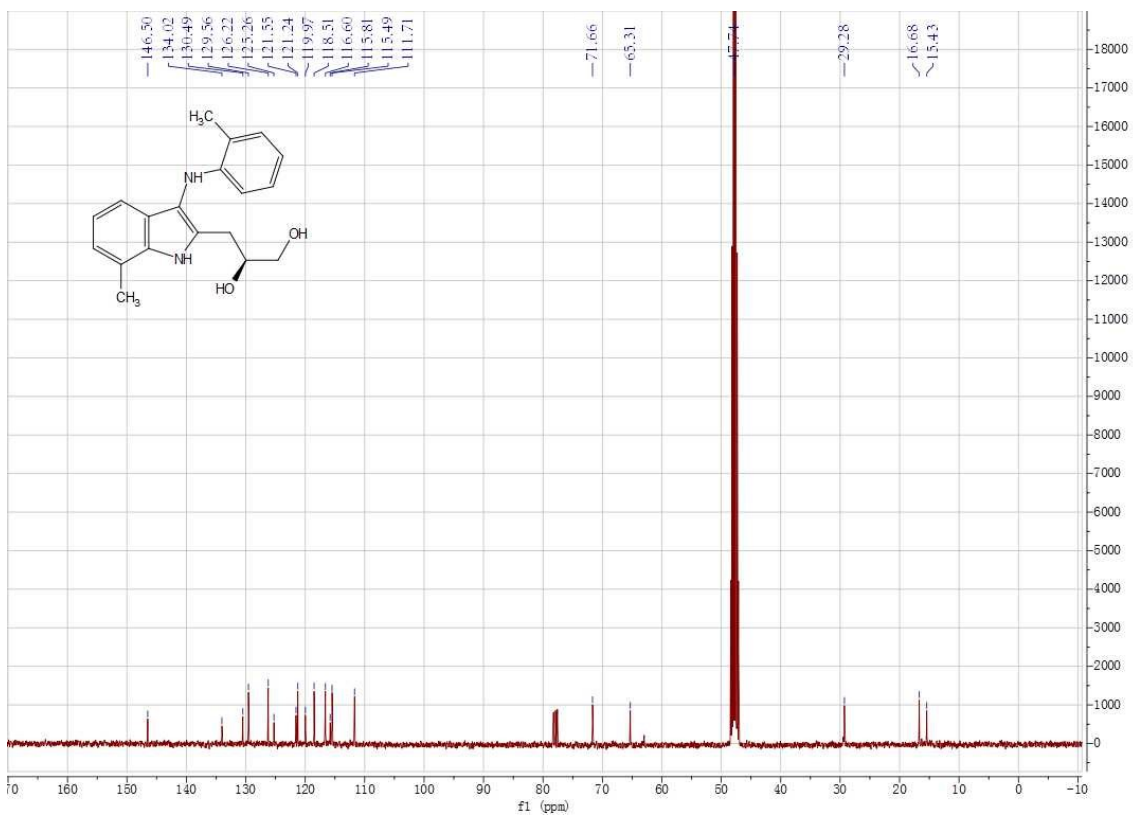

Figure. S42 <sup>13</sup>C{<sup>1</sup>H} NMR of compound **1b**

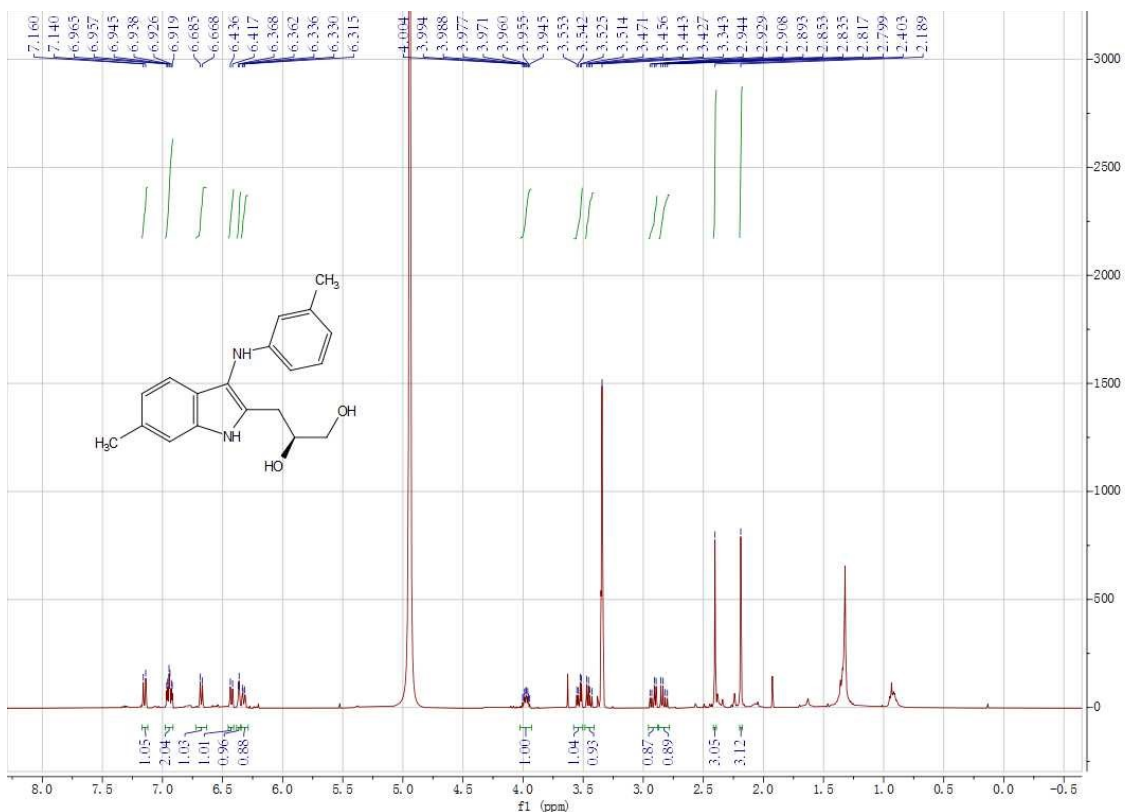

Figure. S43  $^1\text{H}$  NMR of compound 2b

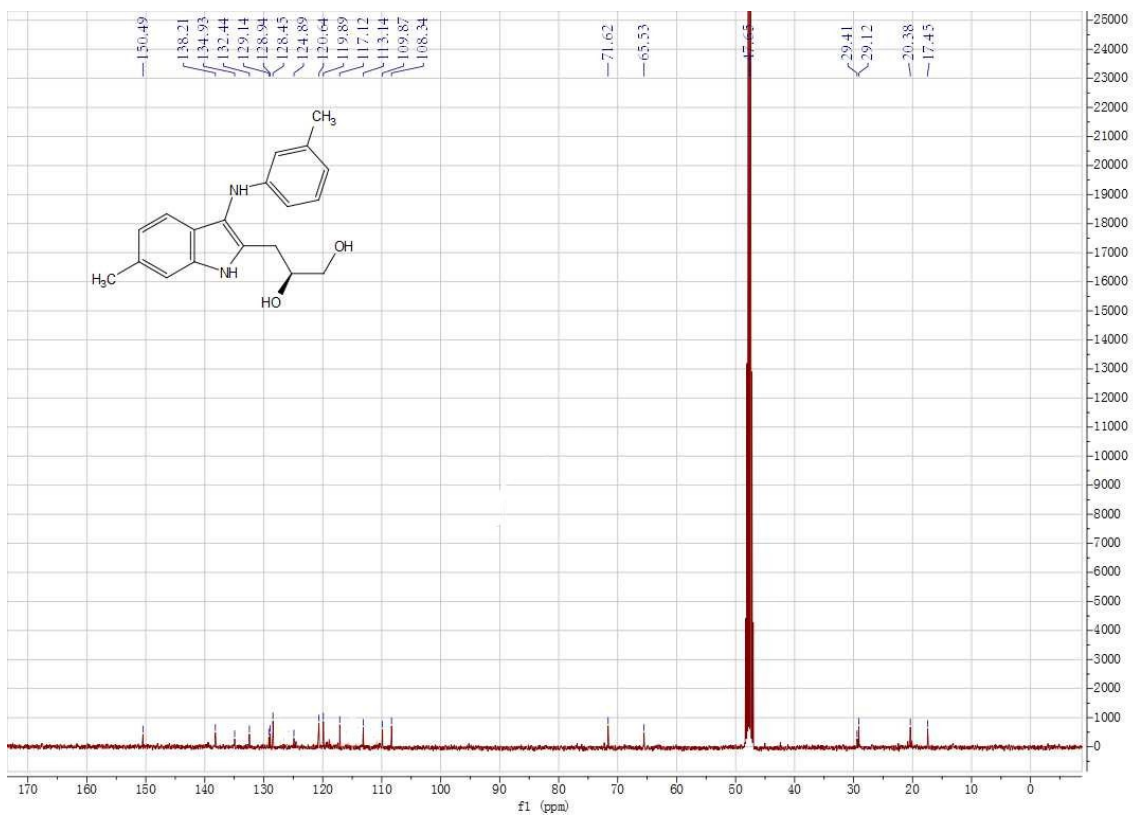

Figure. S44  $^{13}\text{C}\{^1\text{H}\}$  NMR of compound 2b

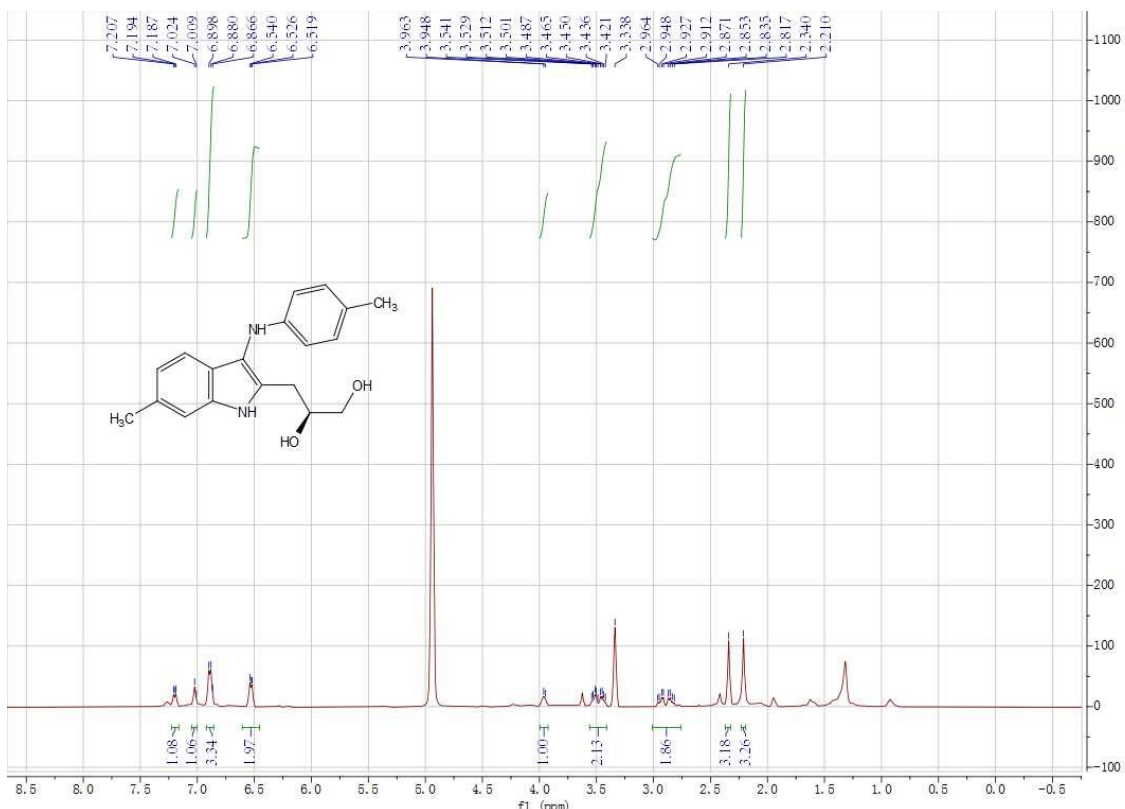

Figure. S45 <sup>1</sup>H NMR of compound 3b

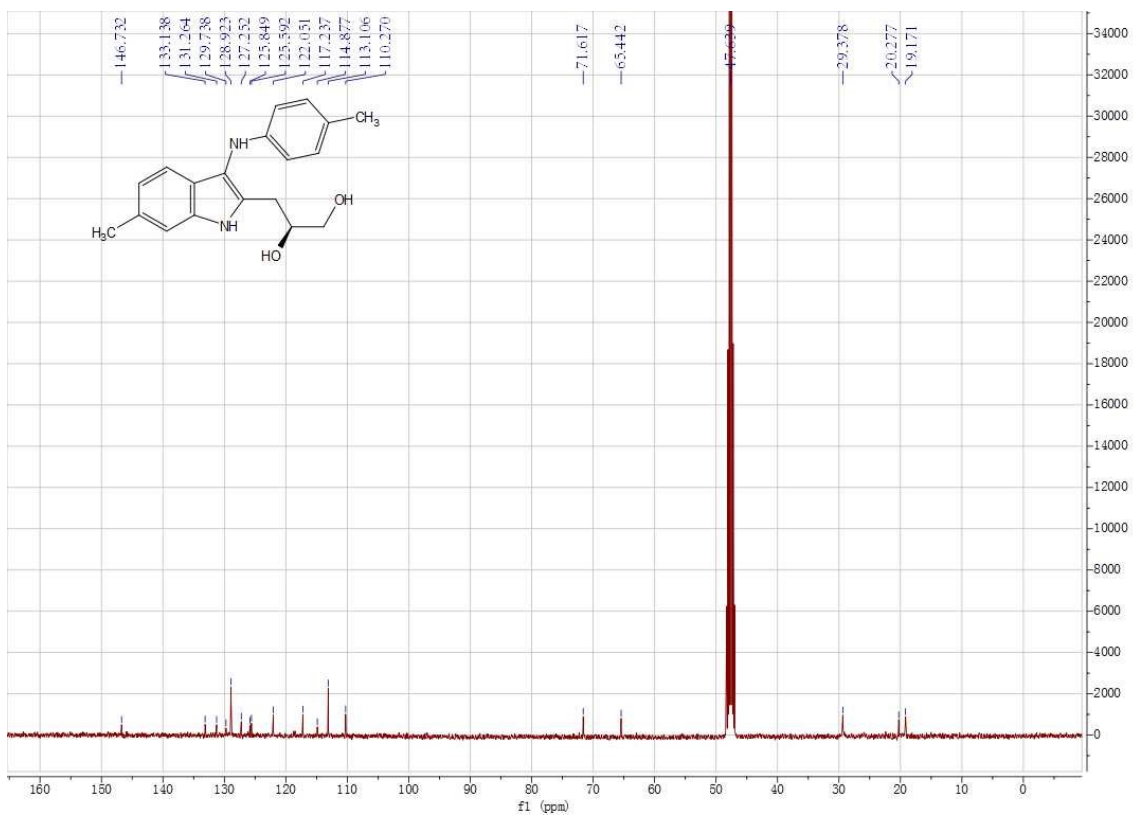

Figure. S46 <sup>13</sup>C {<sup>1</sup>H} NMR of compound 3b

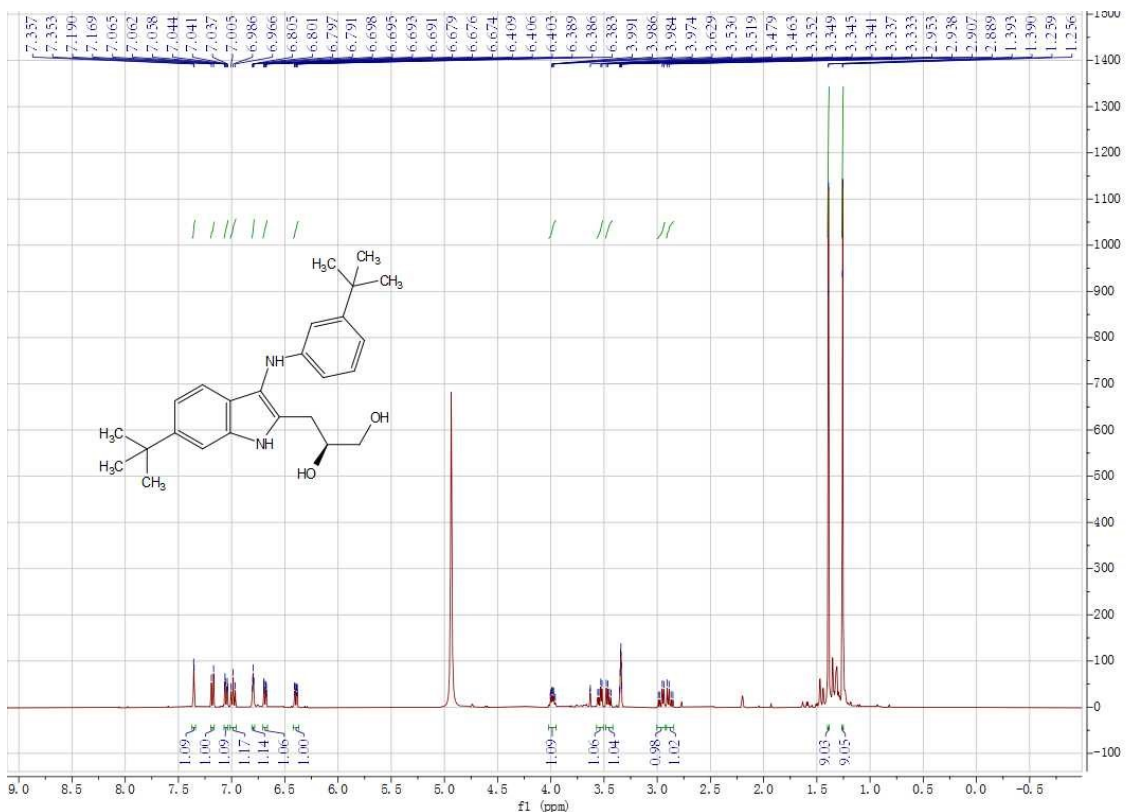

Figure. S47<sup>1</sup>H NMR of compound 4b

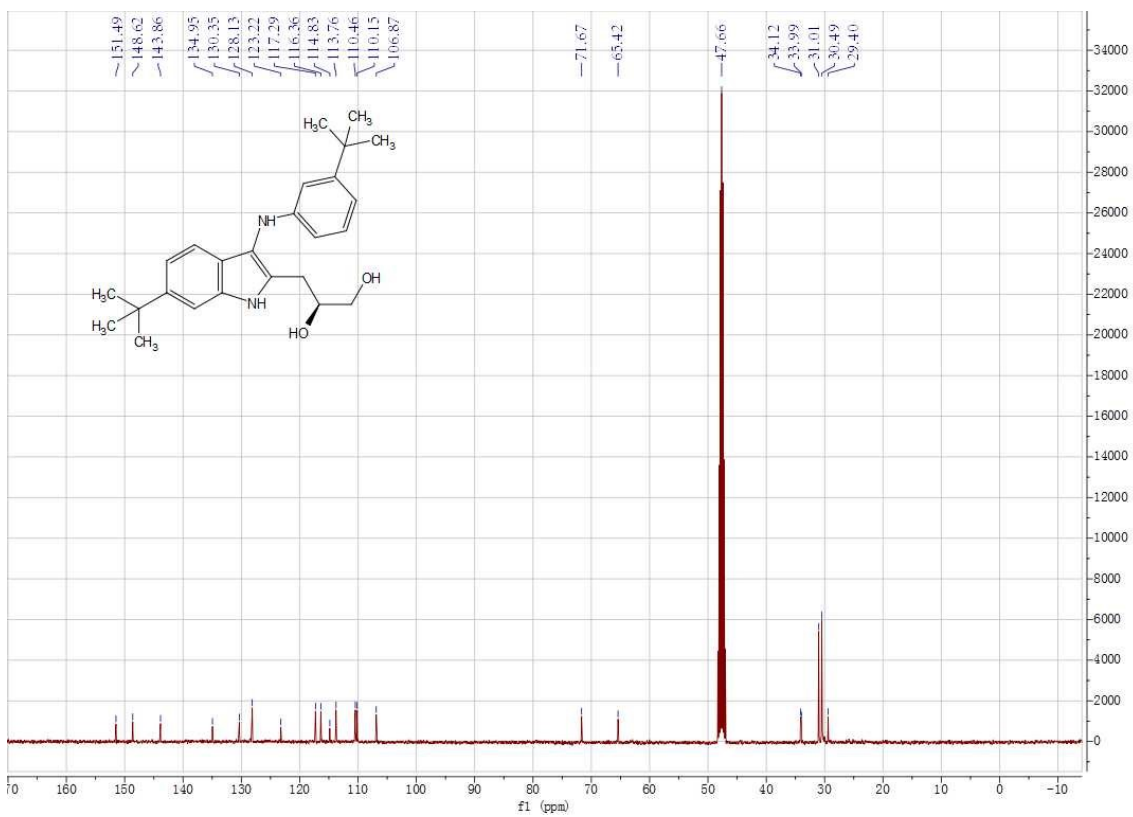

Figure. S48<sup>13</sup>C{<sup>1</sup>H} NMR of compound 4b



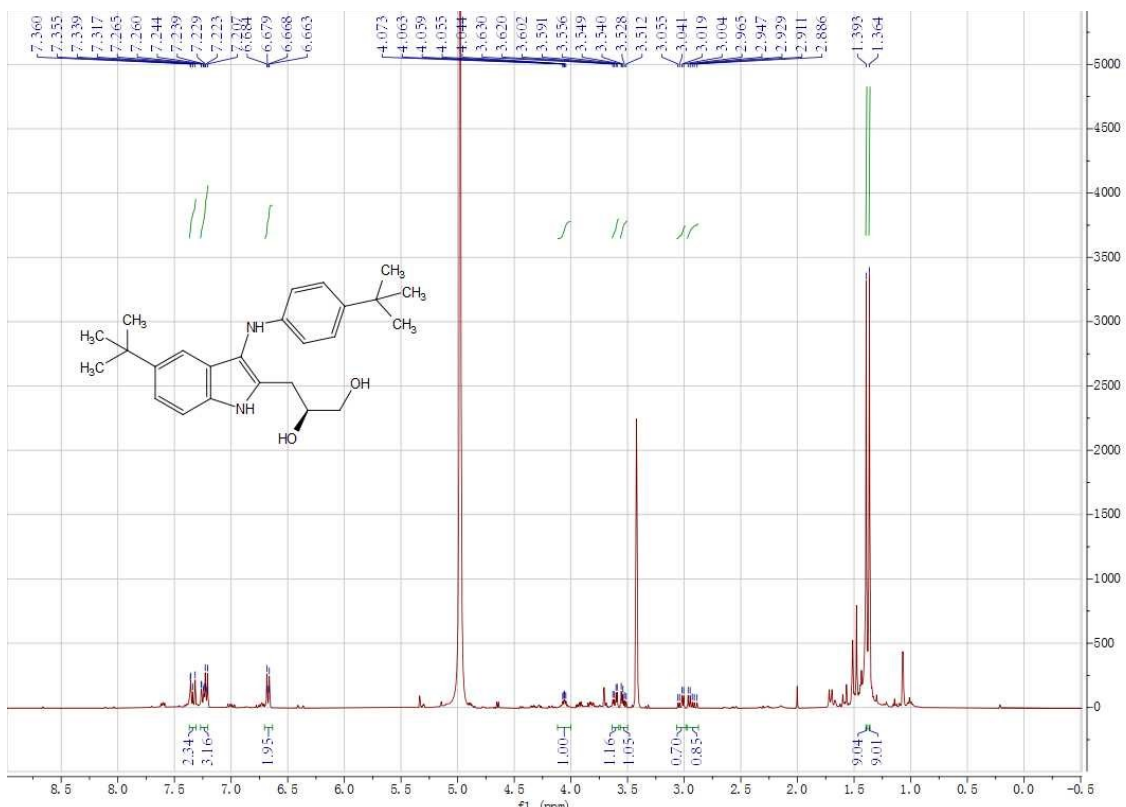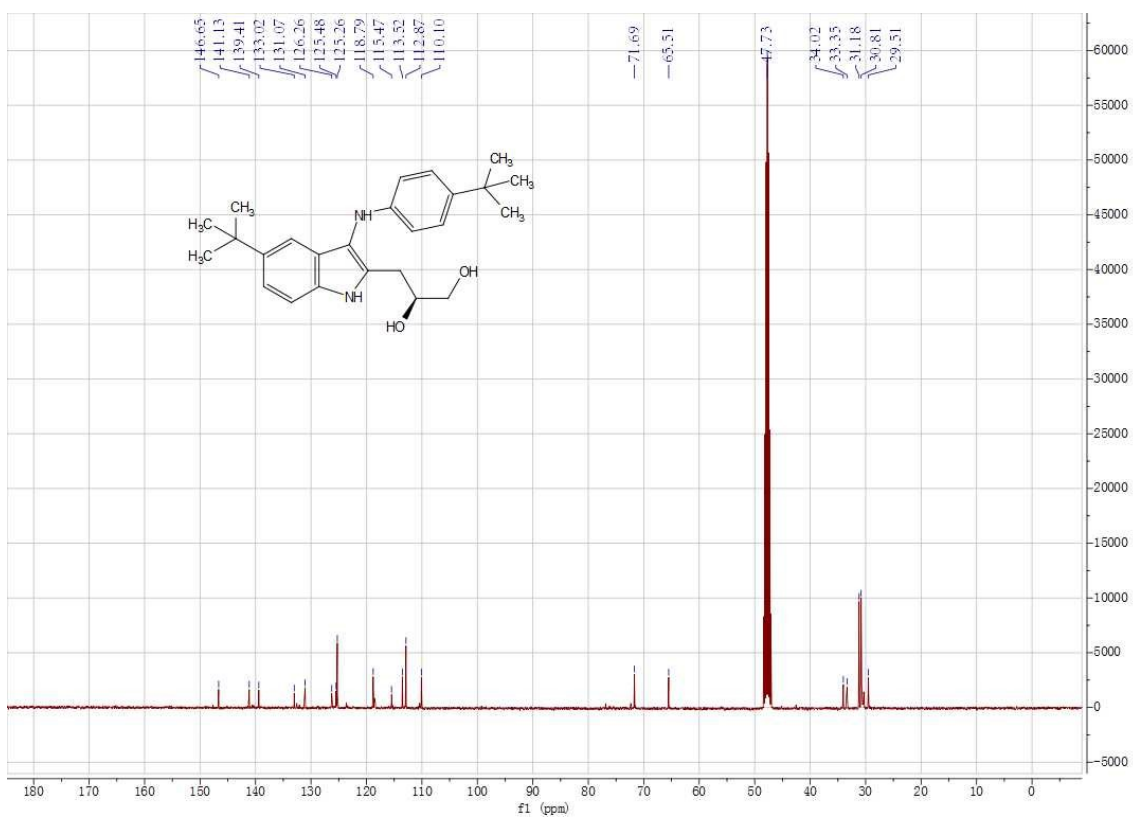

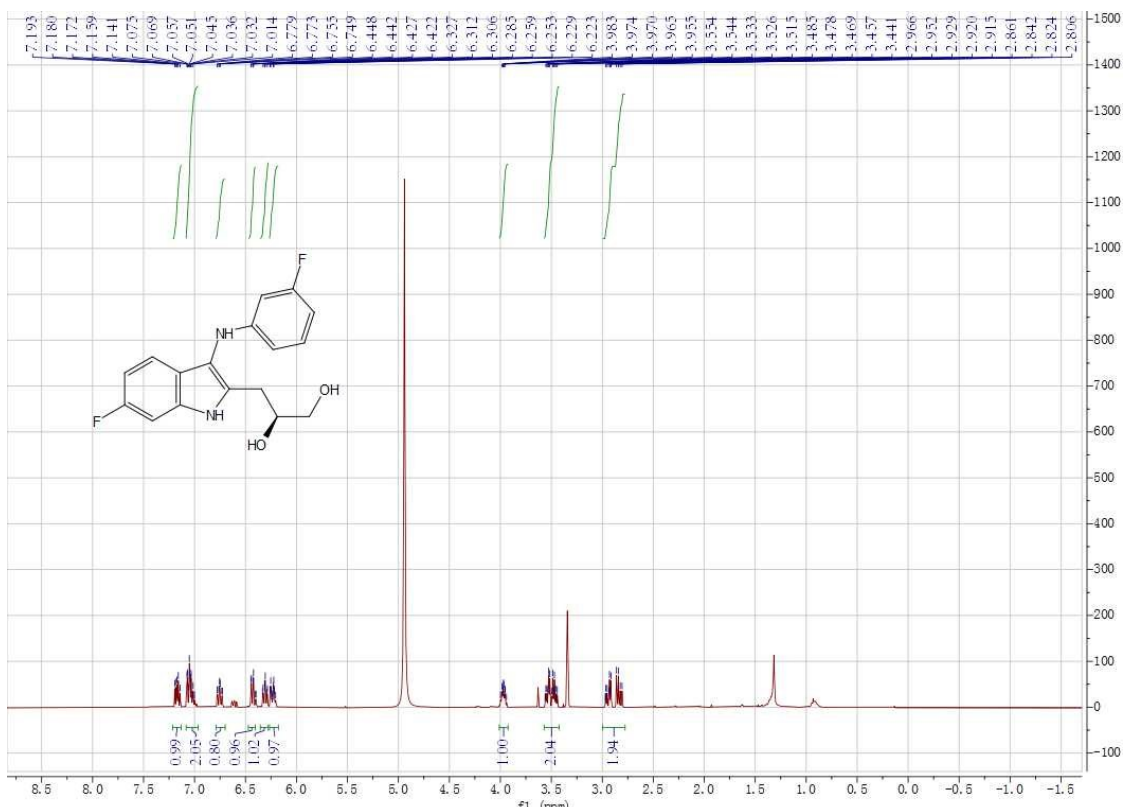

Figure. S51  $^1\text{H}$  NMR of compound 6b

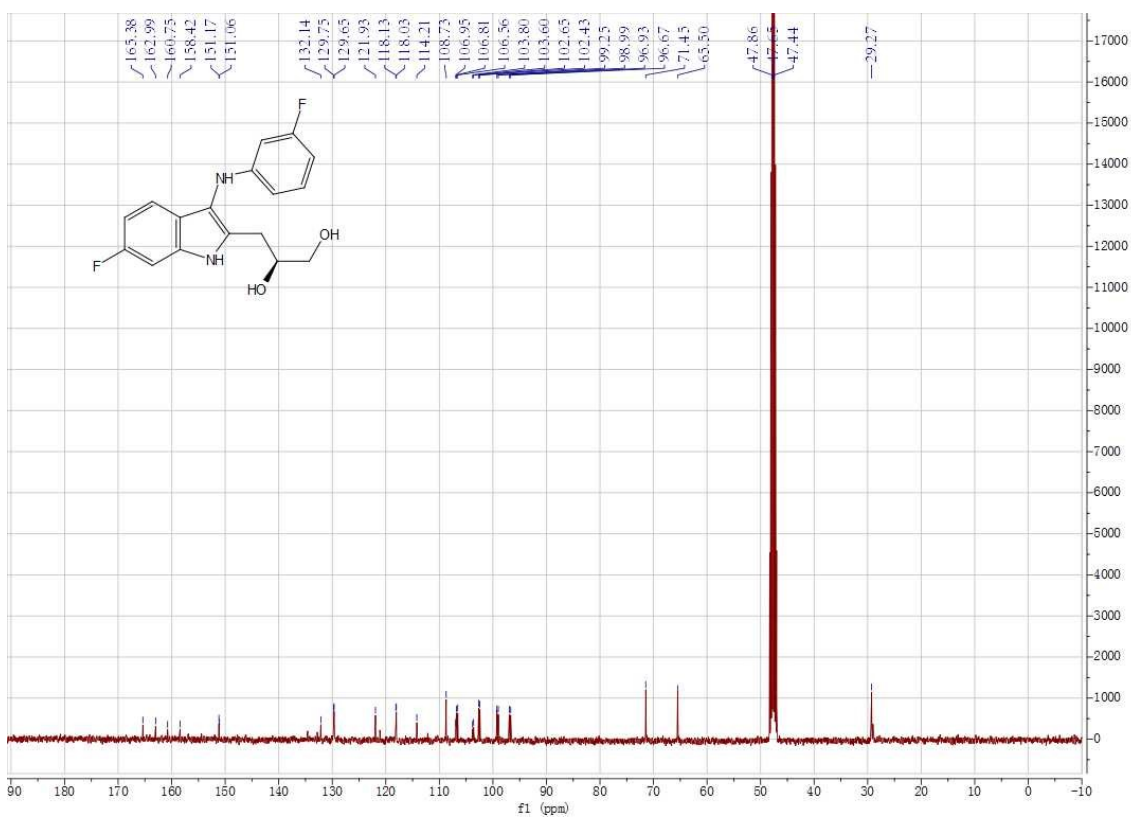

Figure. S52  $^{13}\text{C}\{^1\text{H}\}$  NMR of compound 6b

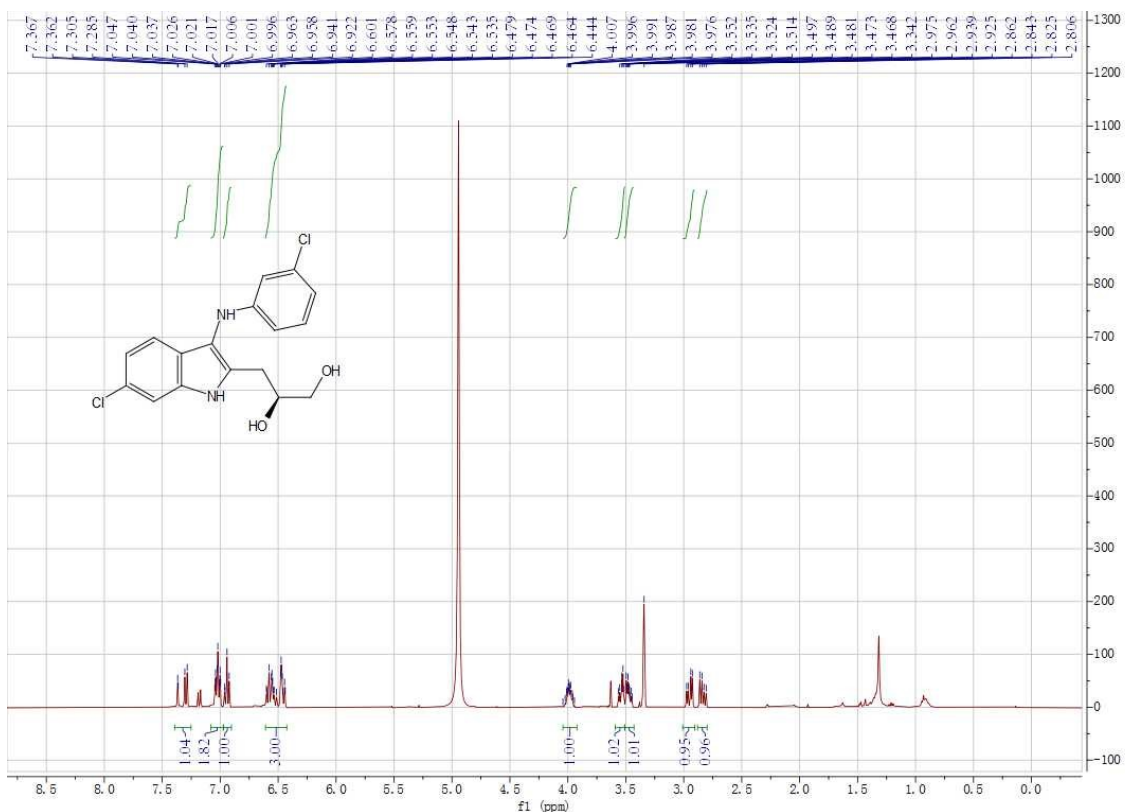

Figure. S53<sup>1</sup>H NMR of compound 7b

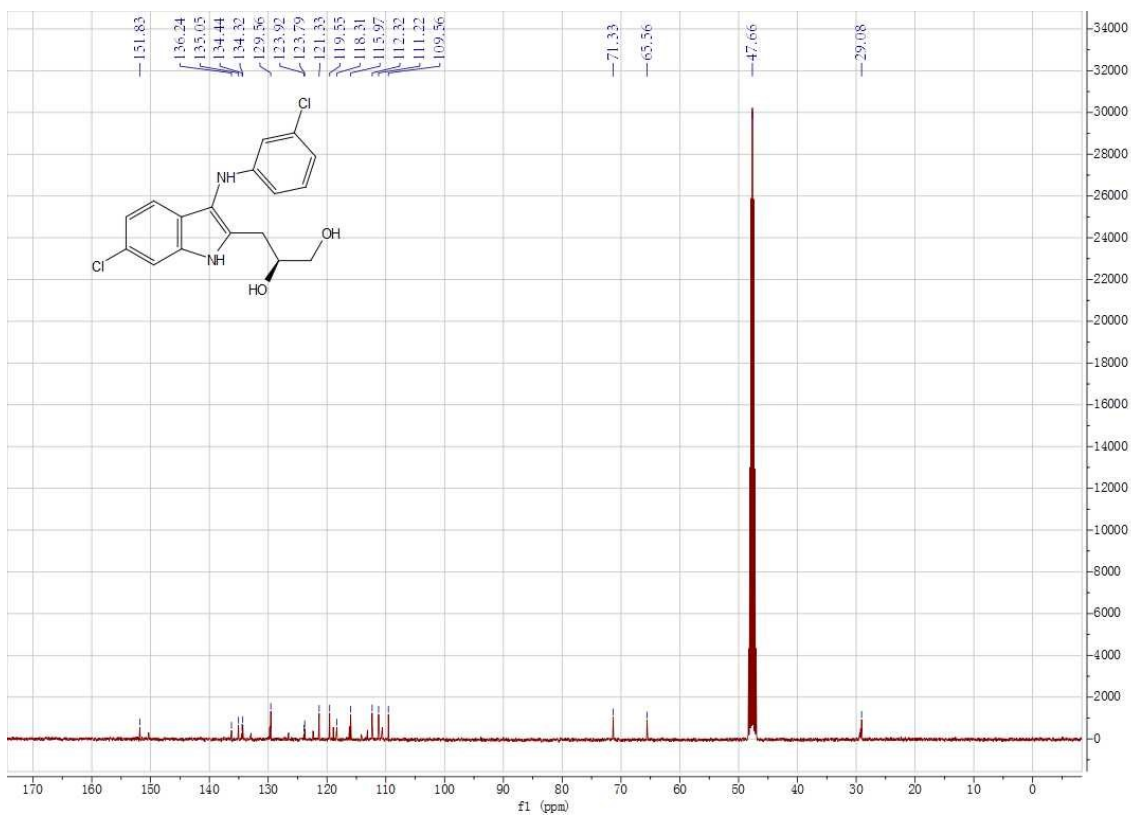

Figure. S54<sup>13</sup>C{<sup>1</sup>H} NMR of compound 7b

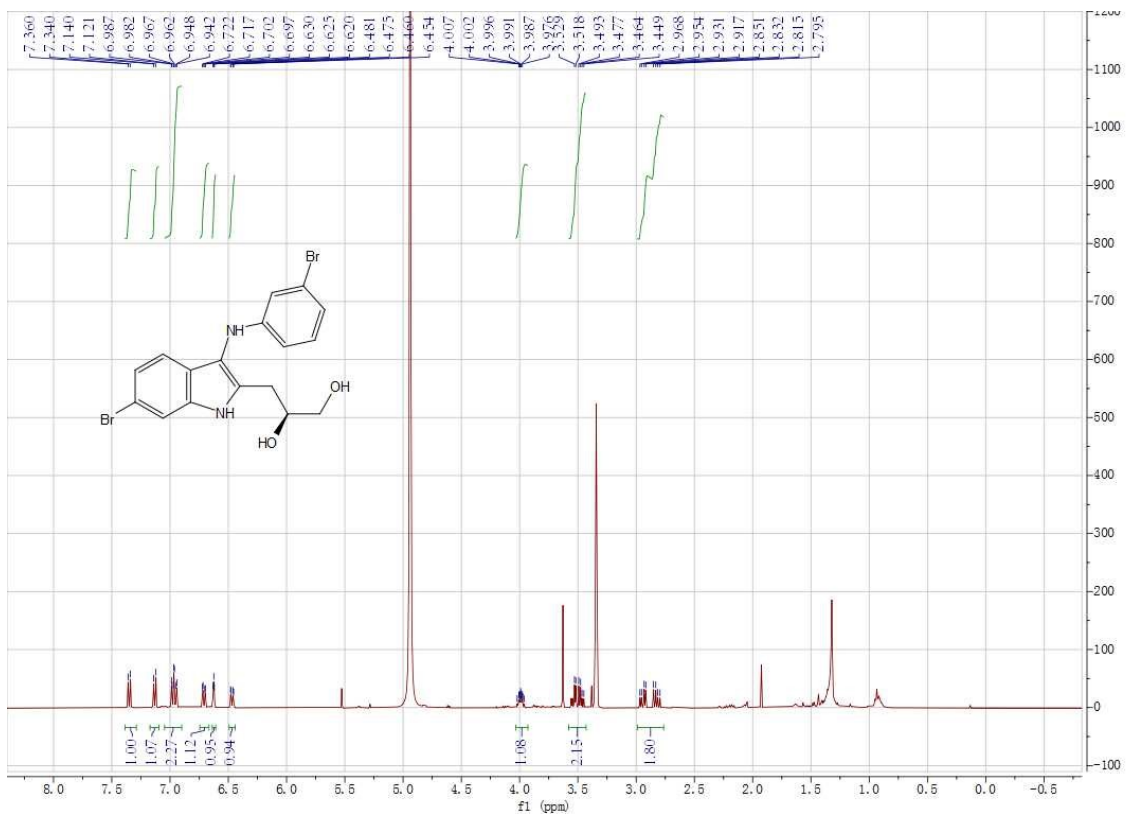

Figure. S55  $^1\text{H}$  NMR of compound 8b

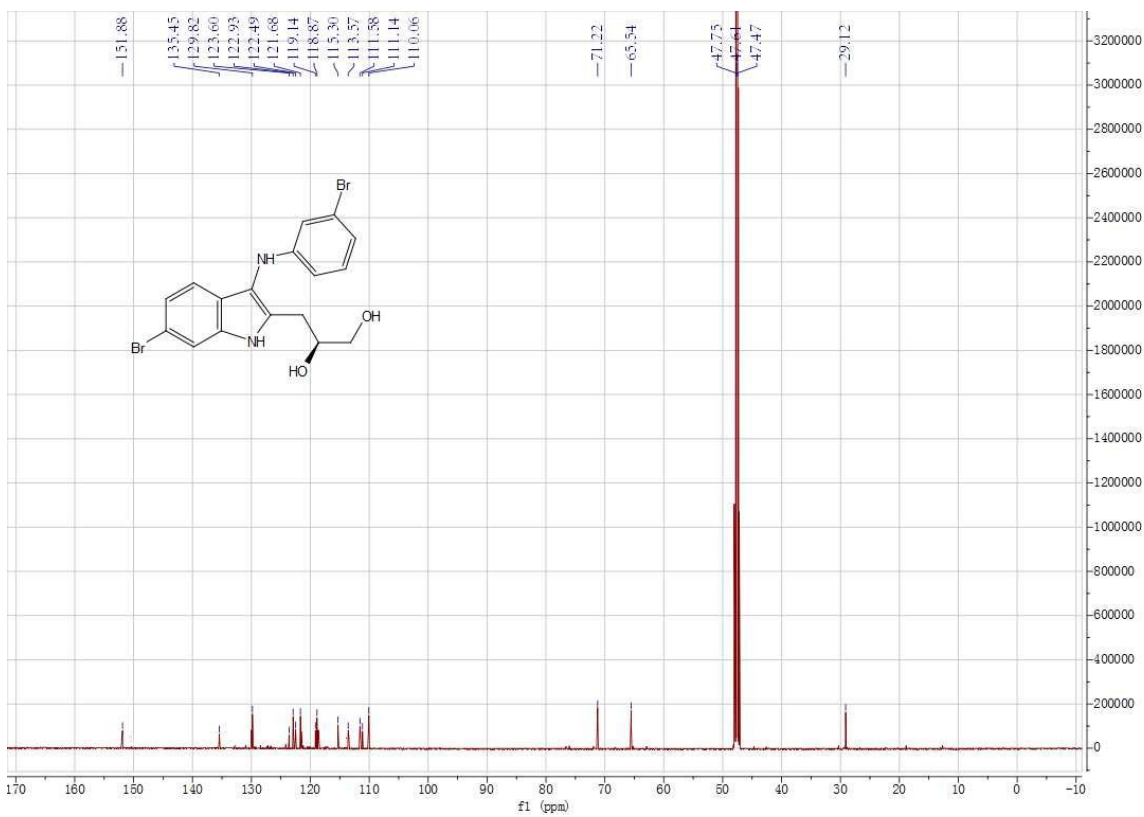

Figure. S56  $^{13}\text{C}\{^1\text{H}\}$  NMR of compound 8b

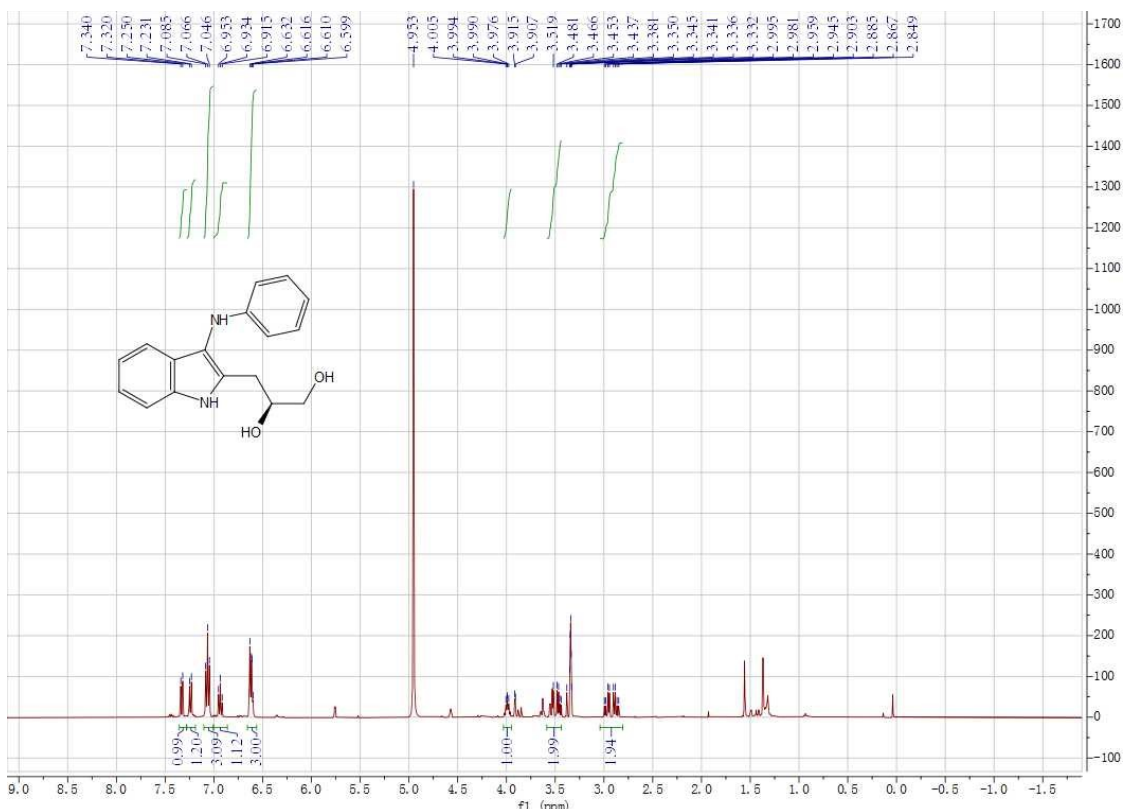

Figure. S57<sup>1</sup>H NMR of compound 9b

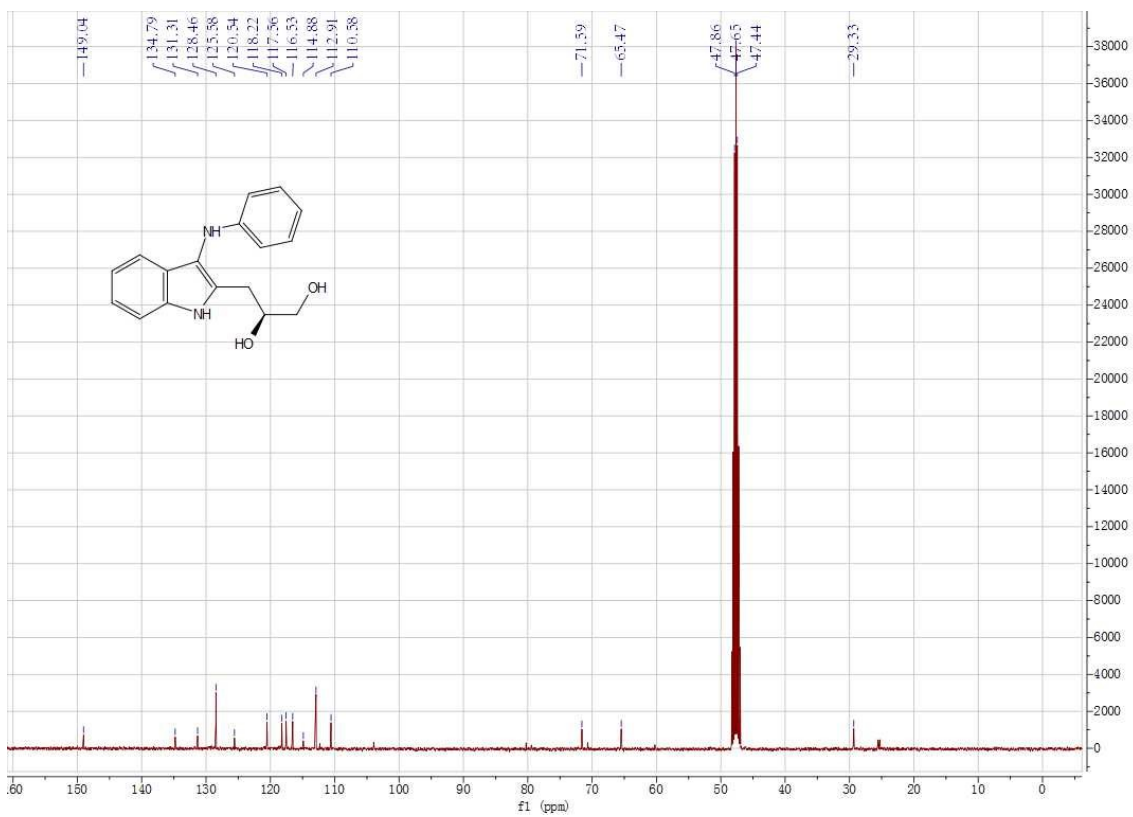

Figure. S58<sup>13</sup>C{<sup>1</sup>H} NMR of compound 9b

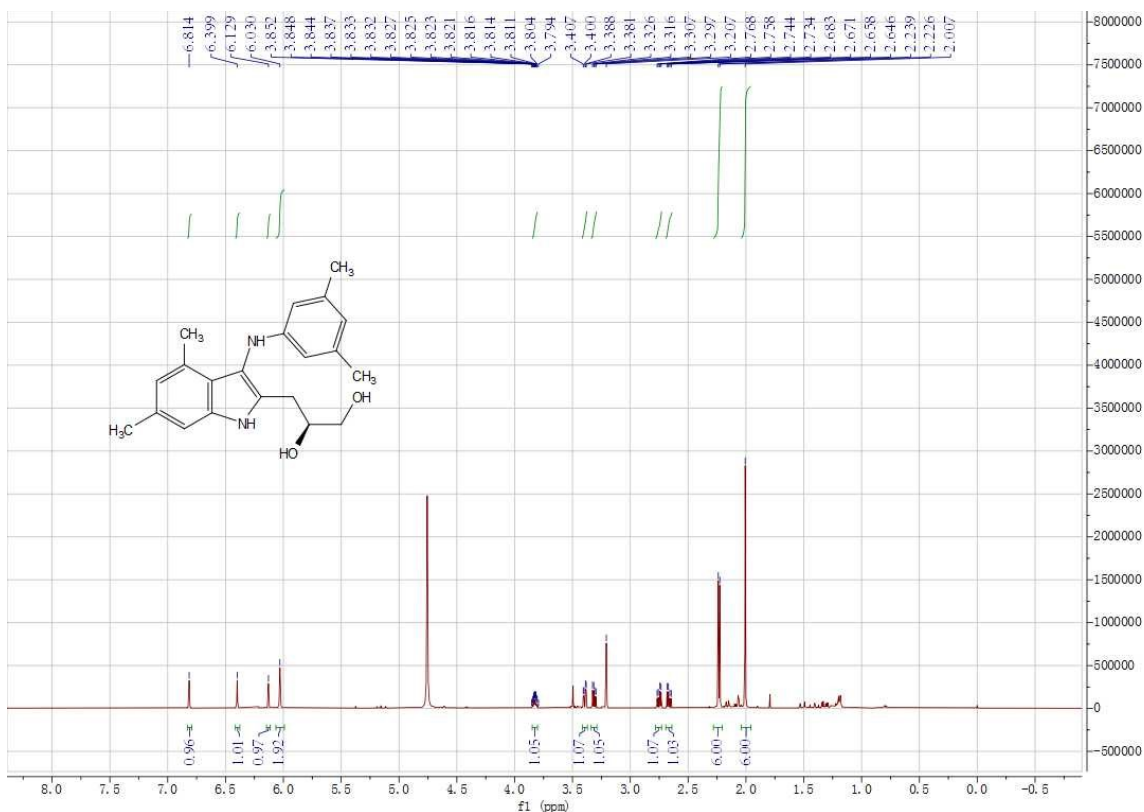

Figure. S59<sup>1</sup>H NMR of compound 10b

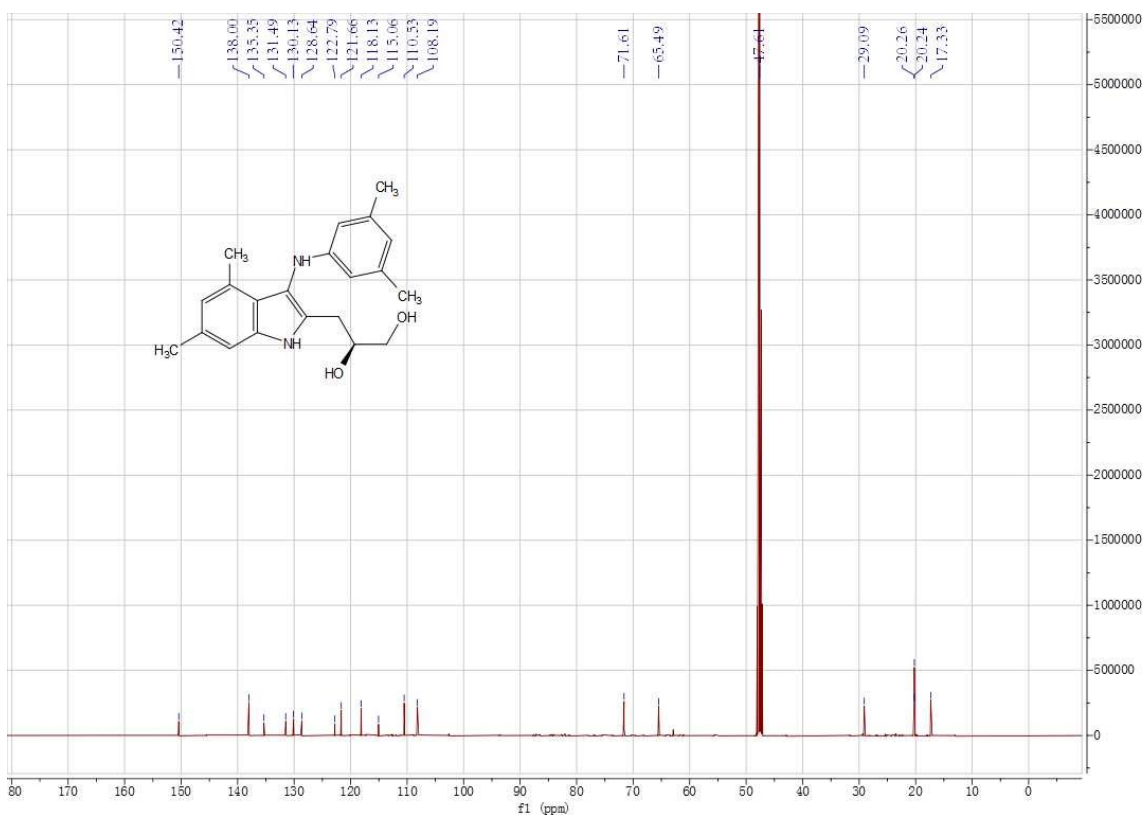

Figure. S60<sup>13</sup>C{<sup>1</sup>H} NMR of compound 10b

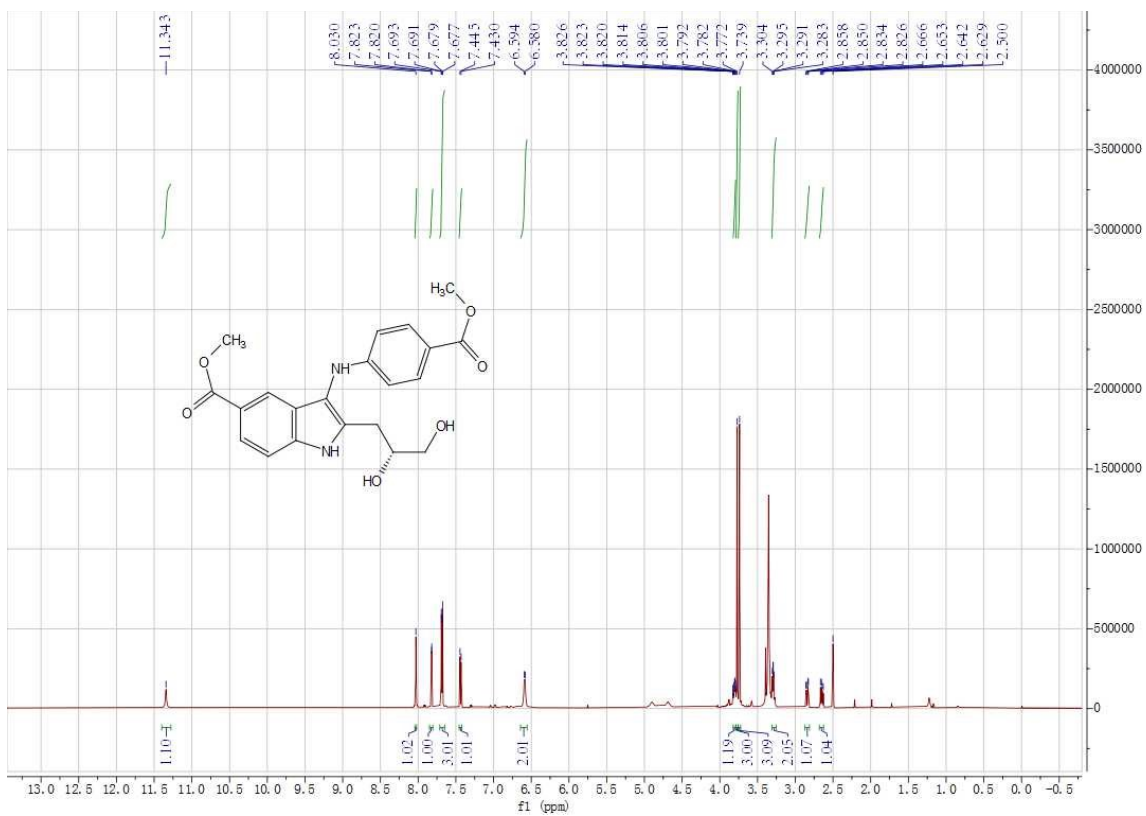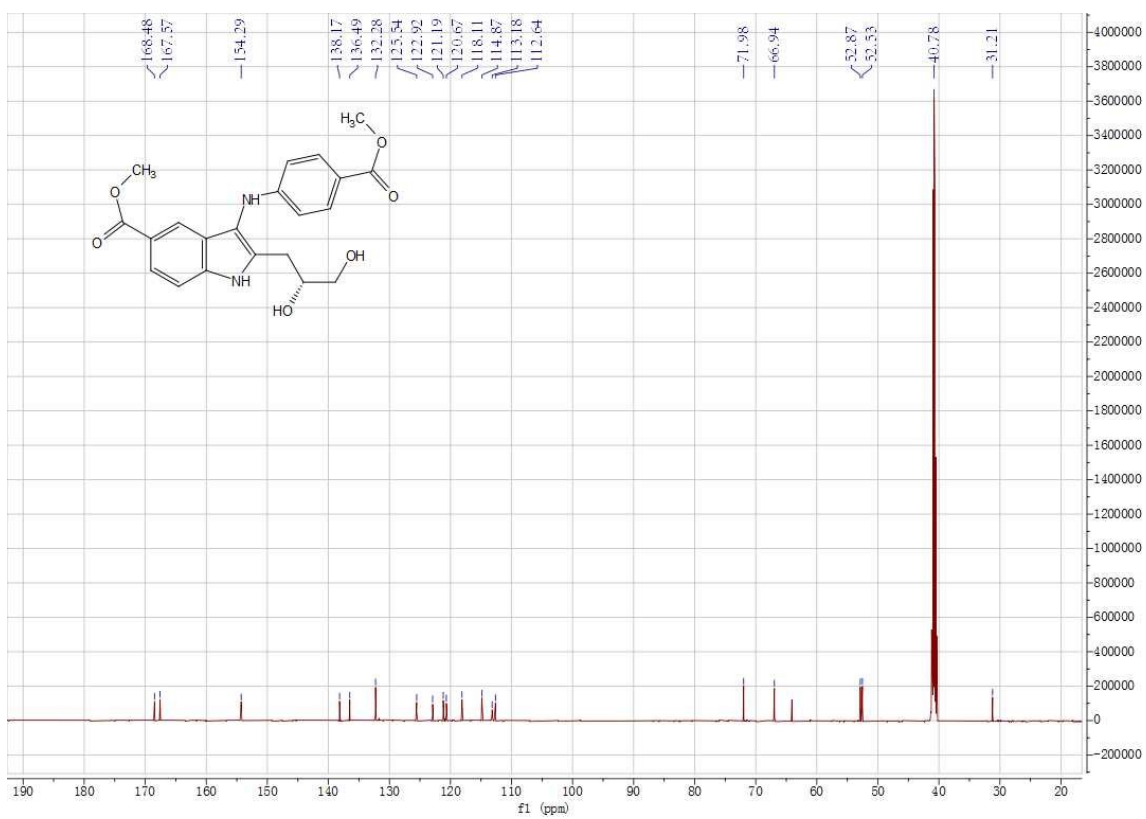

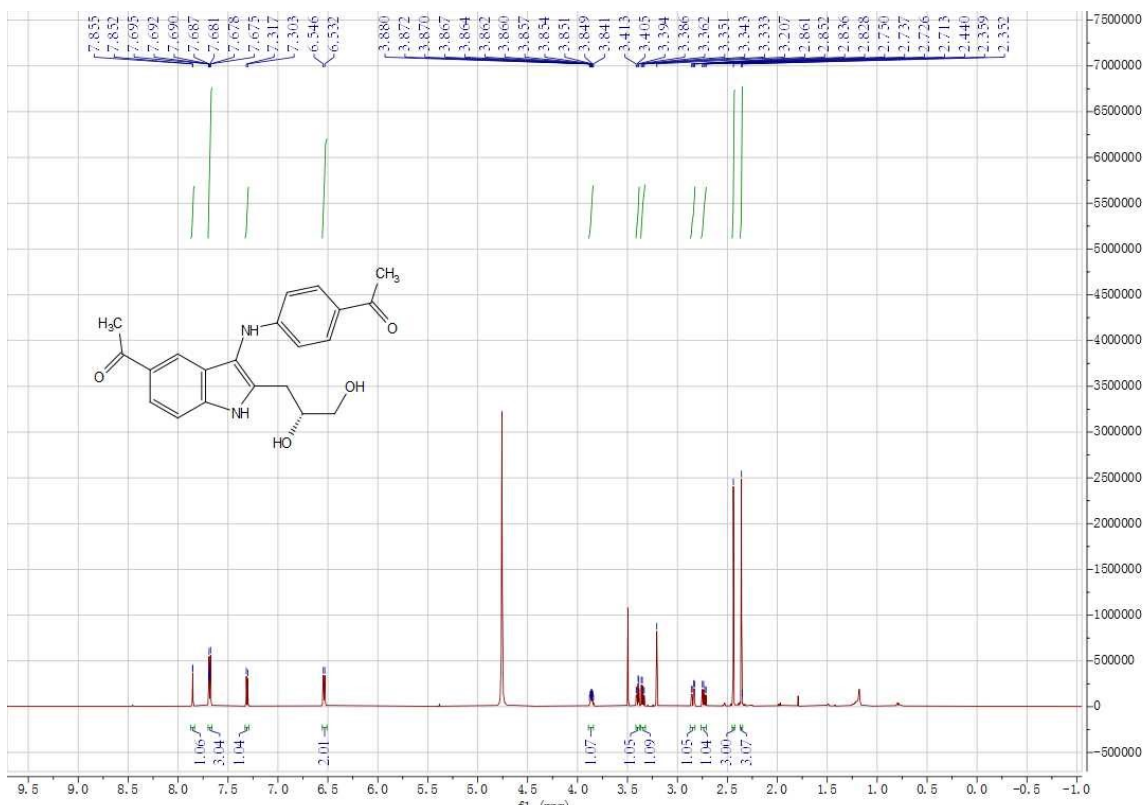

Figure. S63<sup>1</sup>H NMR of compound 12b

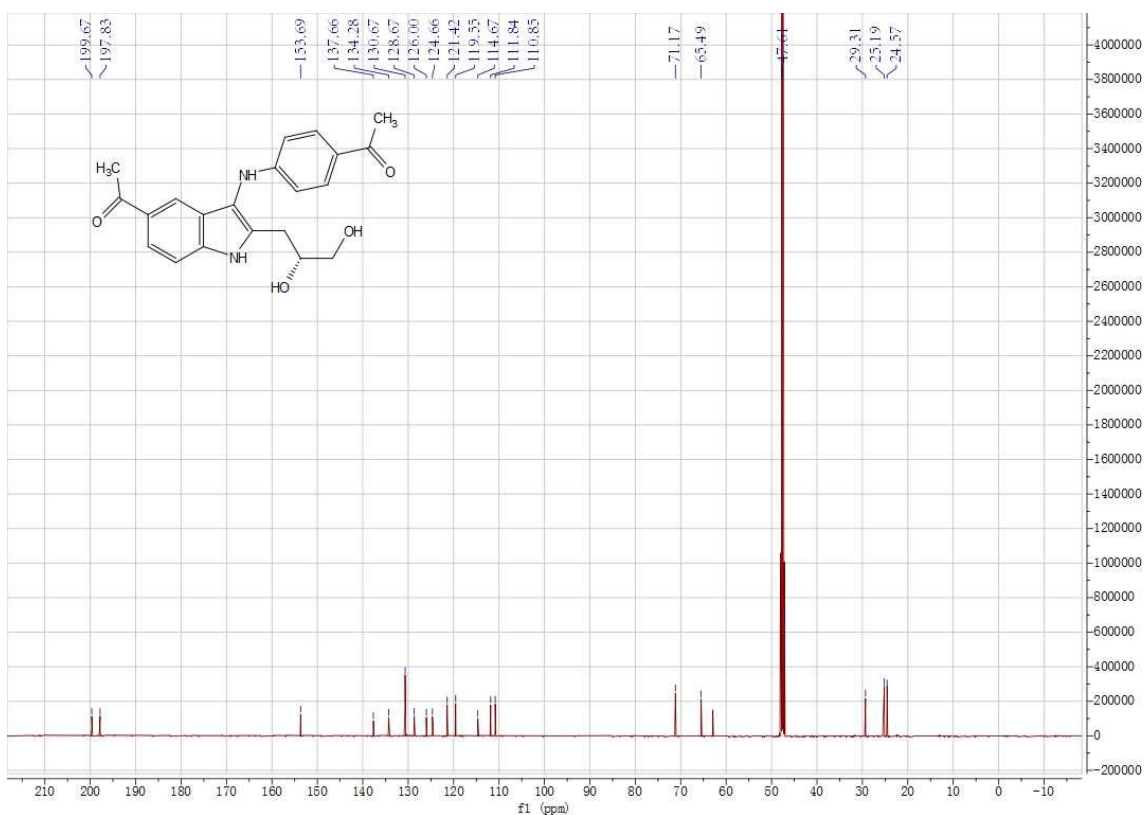

Figure. S64<sup>13</sup>C{<sup>1</sup>H} NMR of compound 12b



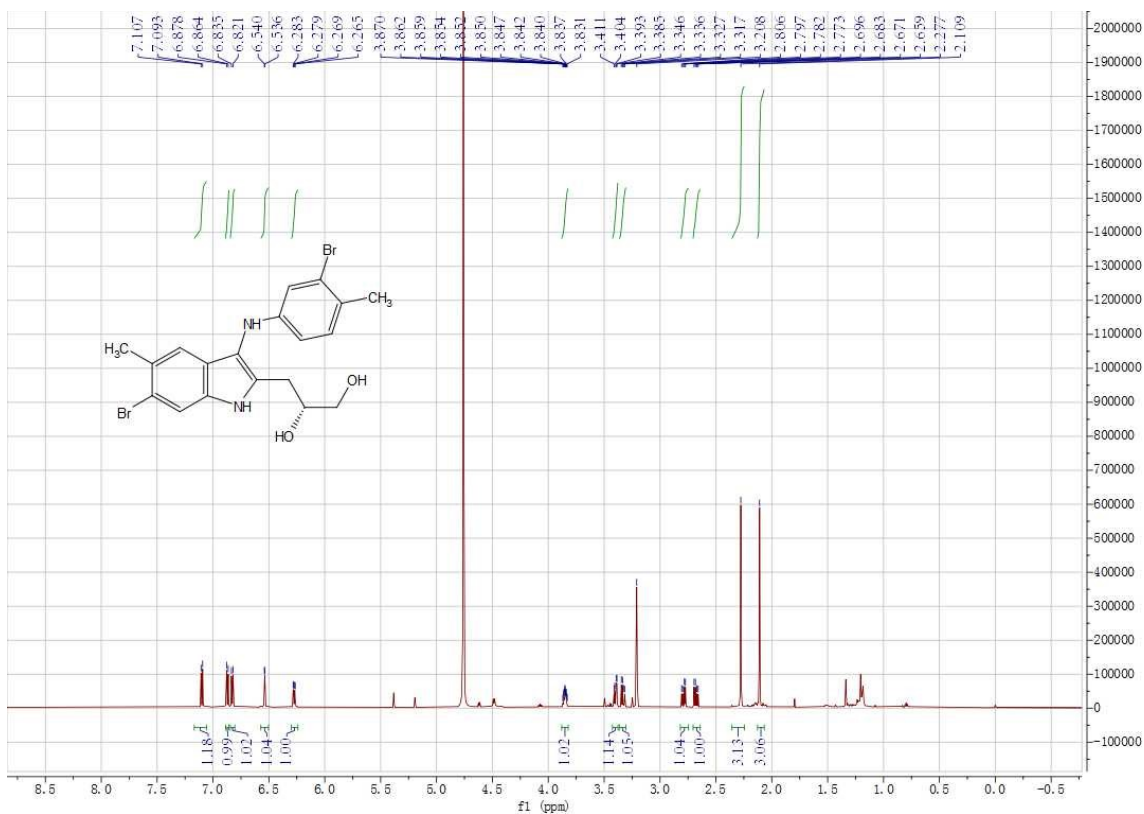

Figure. S65<sup>1</sup>H NMR of compound 13b

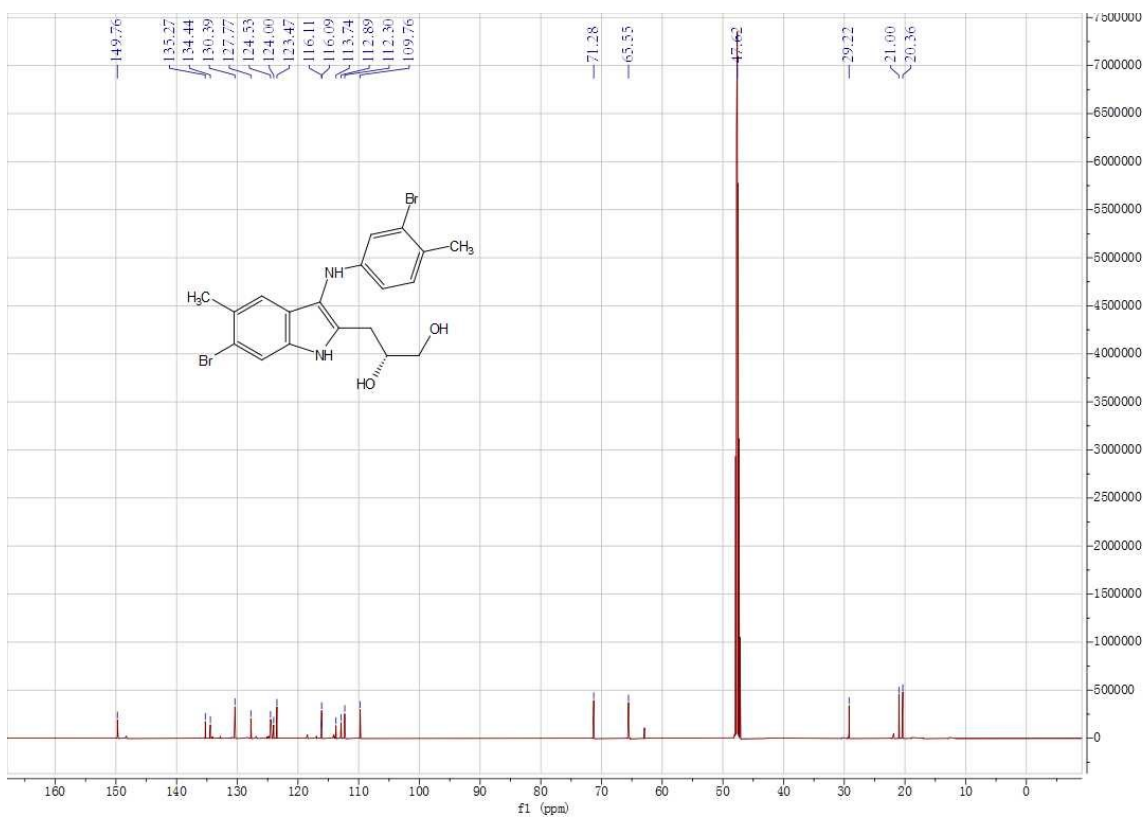

Figure. S66<sup>13</sup>C{<sup>1</sup>H} NMR of compound 13b

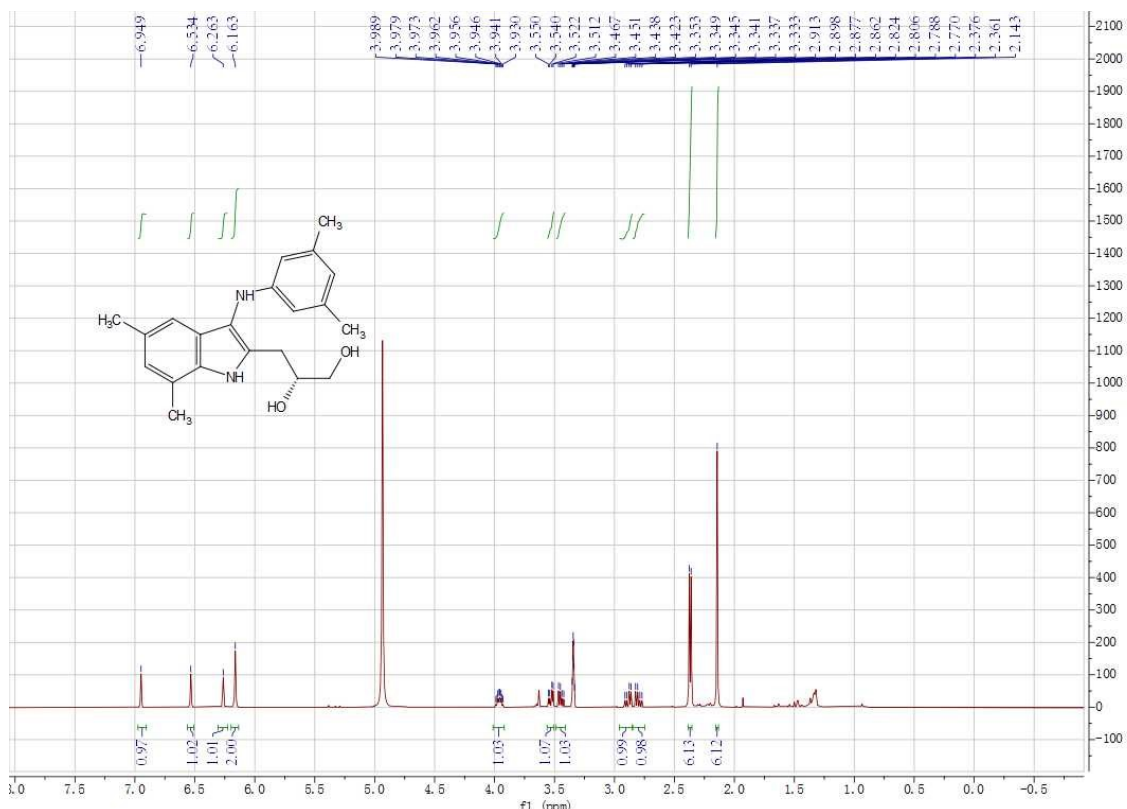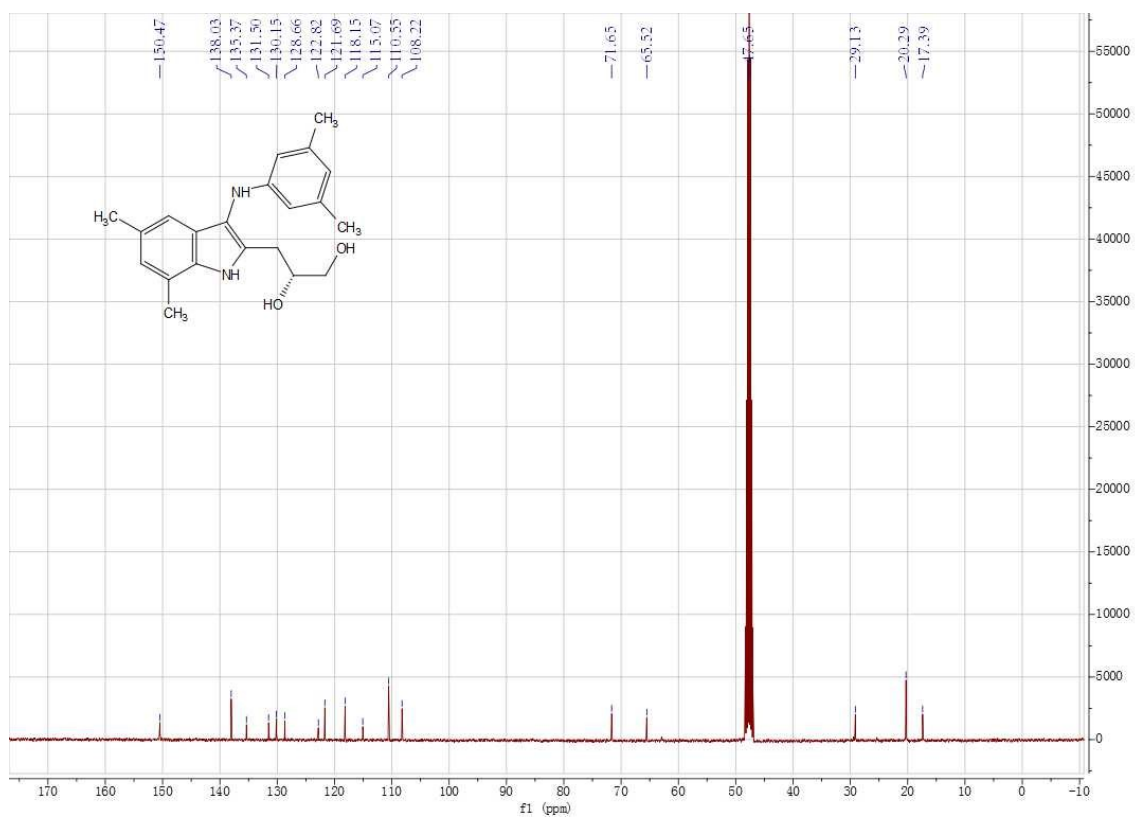

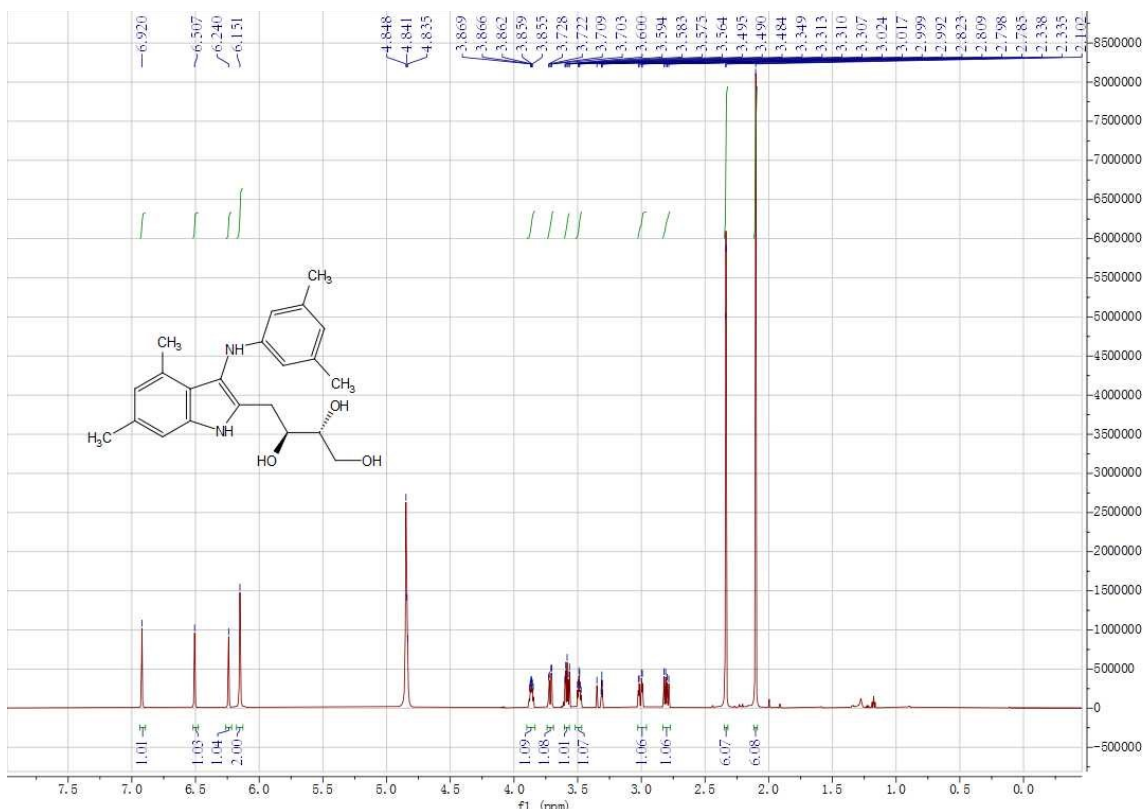

Figure. S69<sup>1</sup>H NMR of compound **15b**

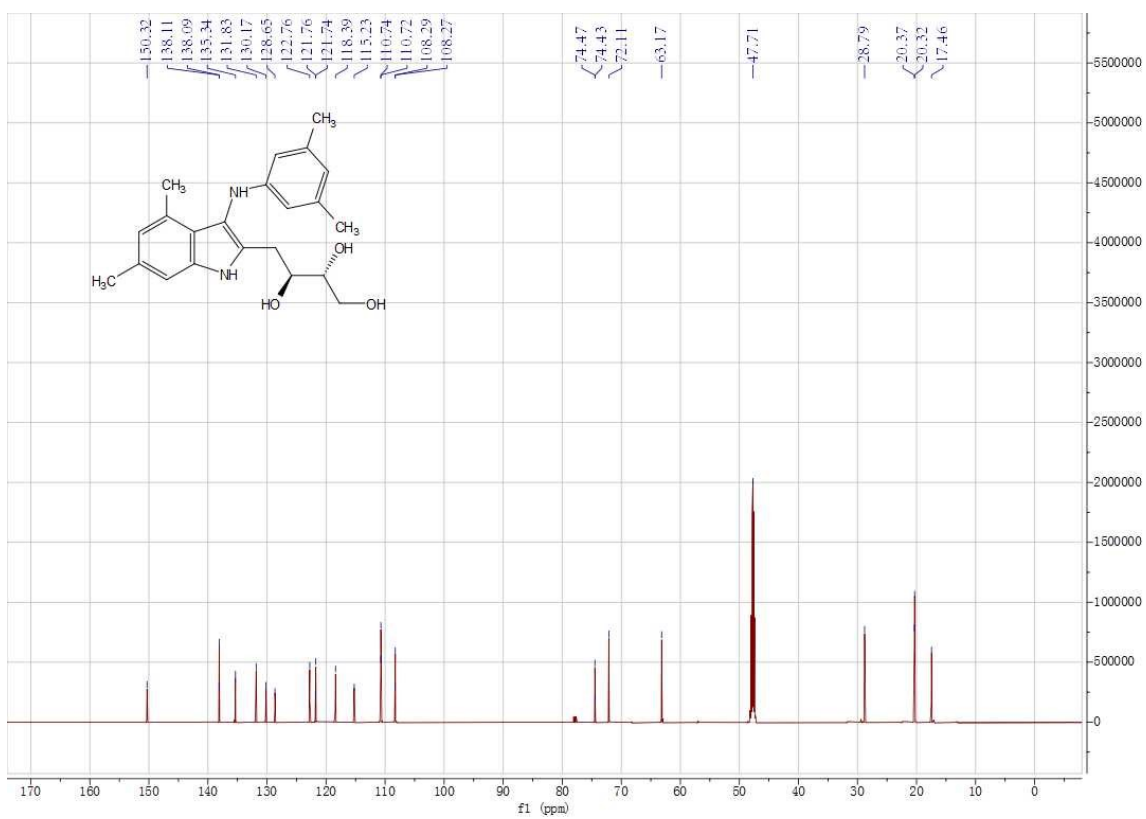

Figure. S70<sup>13</sup>C{<sup>1</sup>H} NMR of compound **15b**

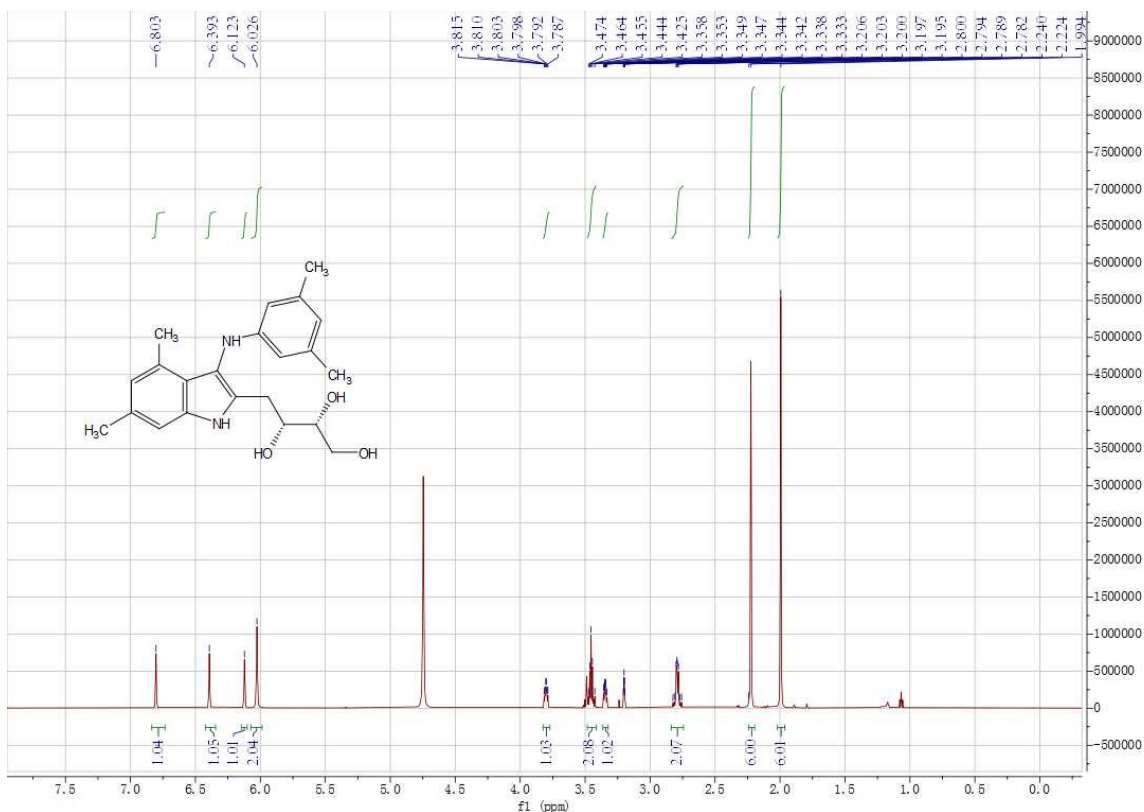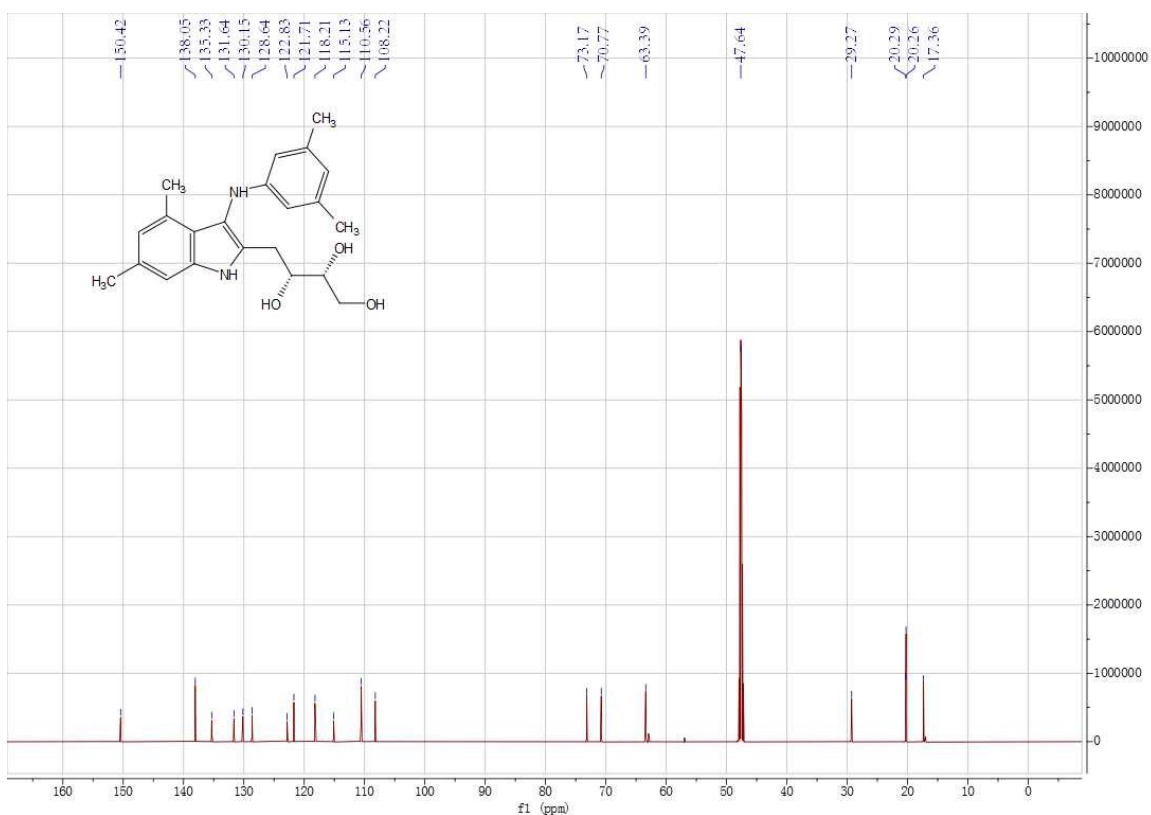

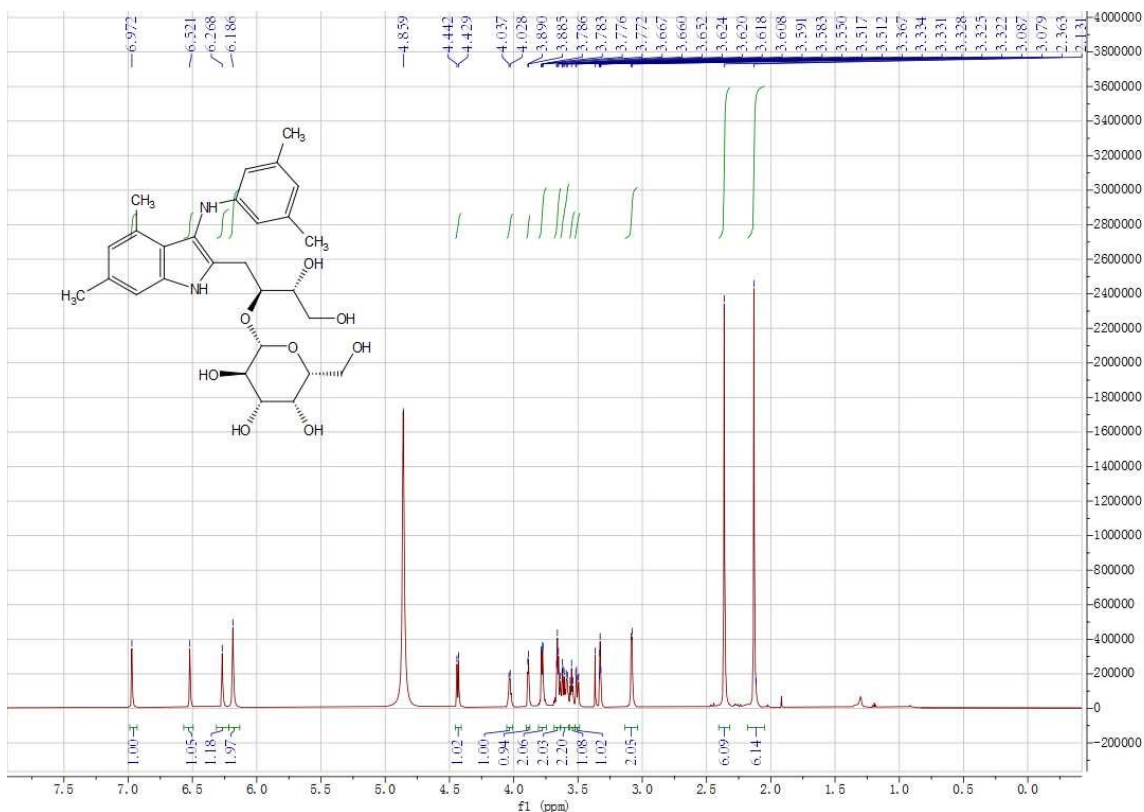

Figure. S73<sup>1</sup>H NMR of compound 17b

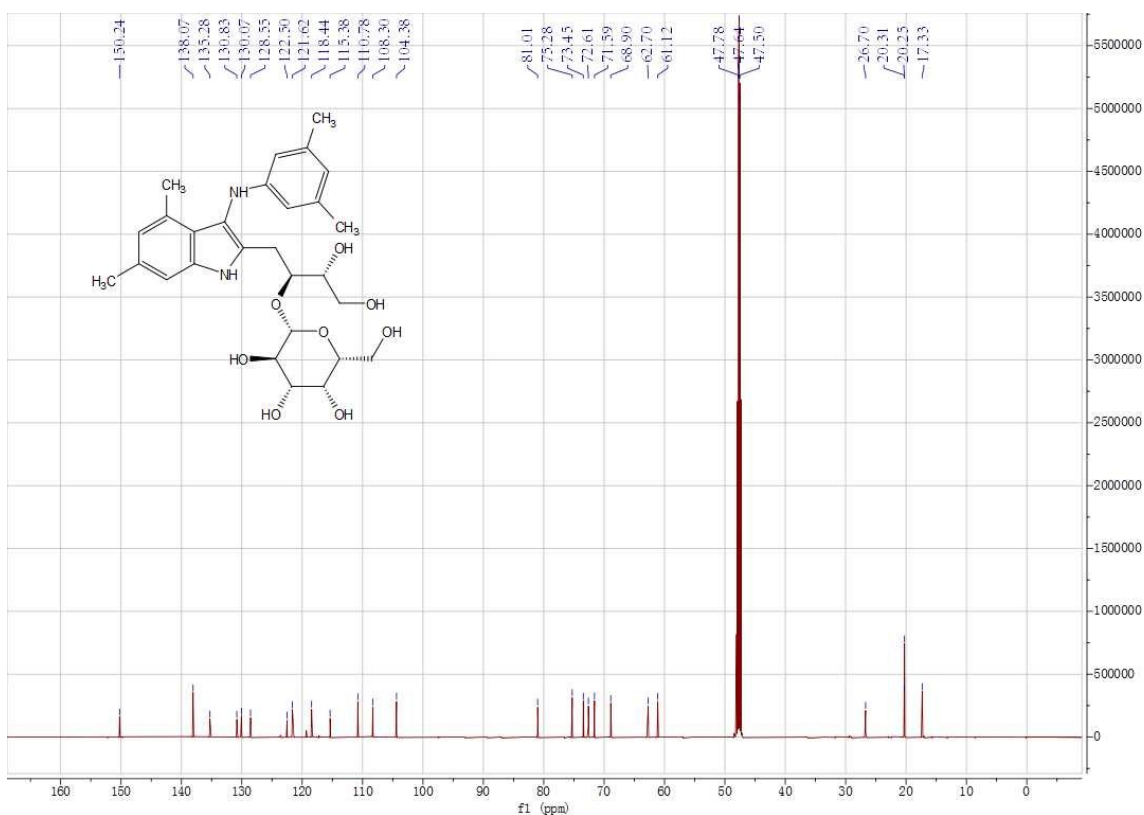

Figure. S74<sup>13</sup>C{<sup>1</sup>H} NMR of compound 17b

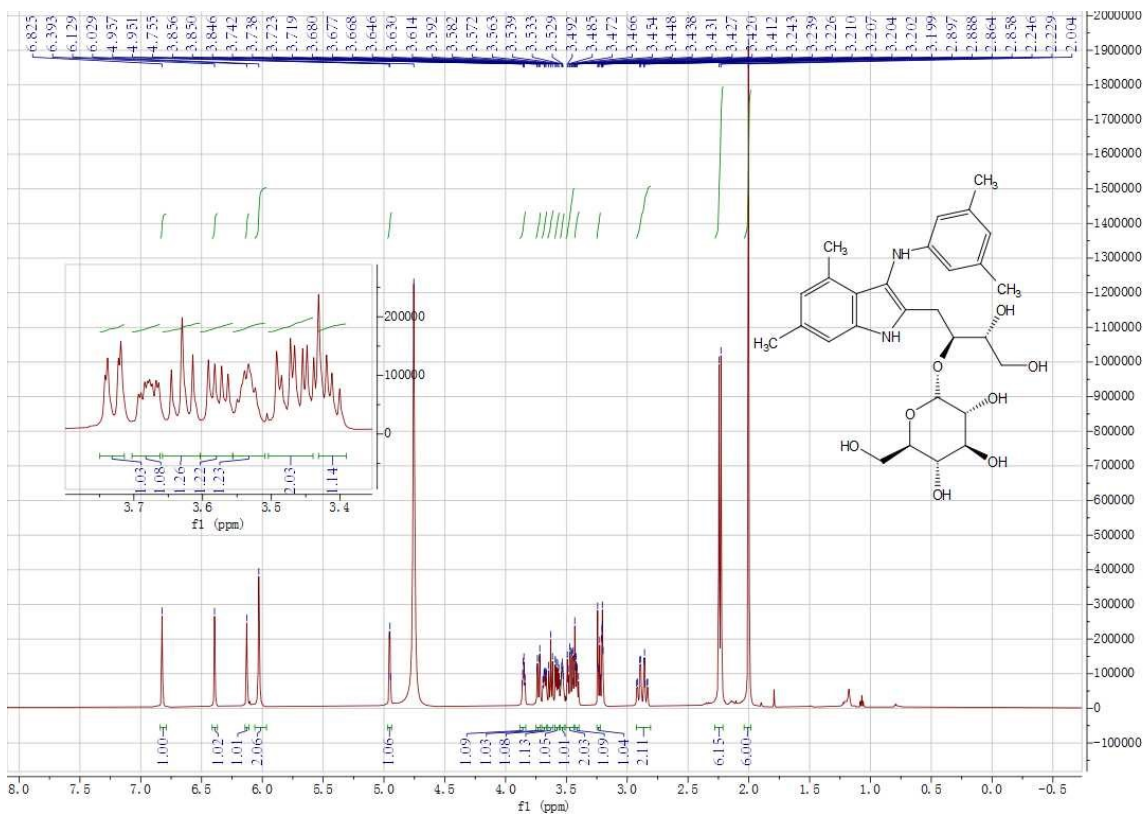

Figure.  $^{75}\text{H}$  NMR of compound 18b

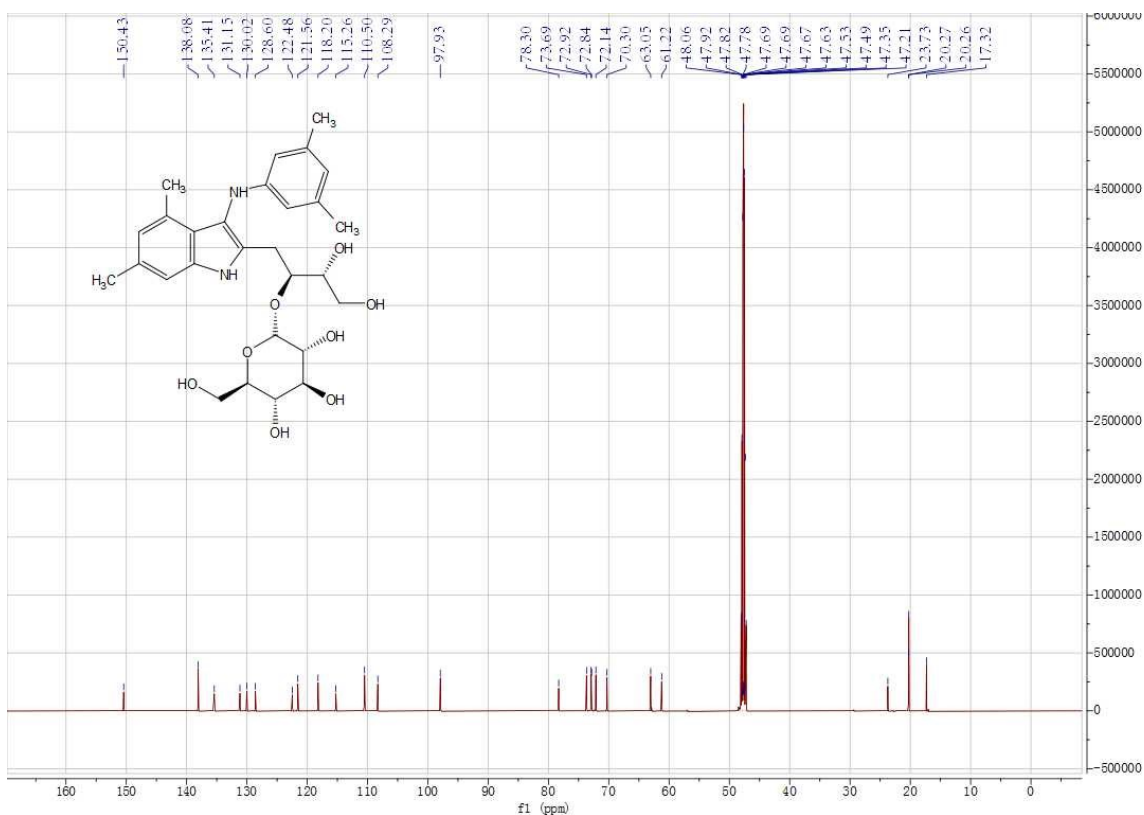

Figure.  $^{76}\text{C}\{^1\text{H}\}$  NMR of compound 18b

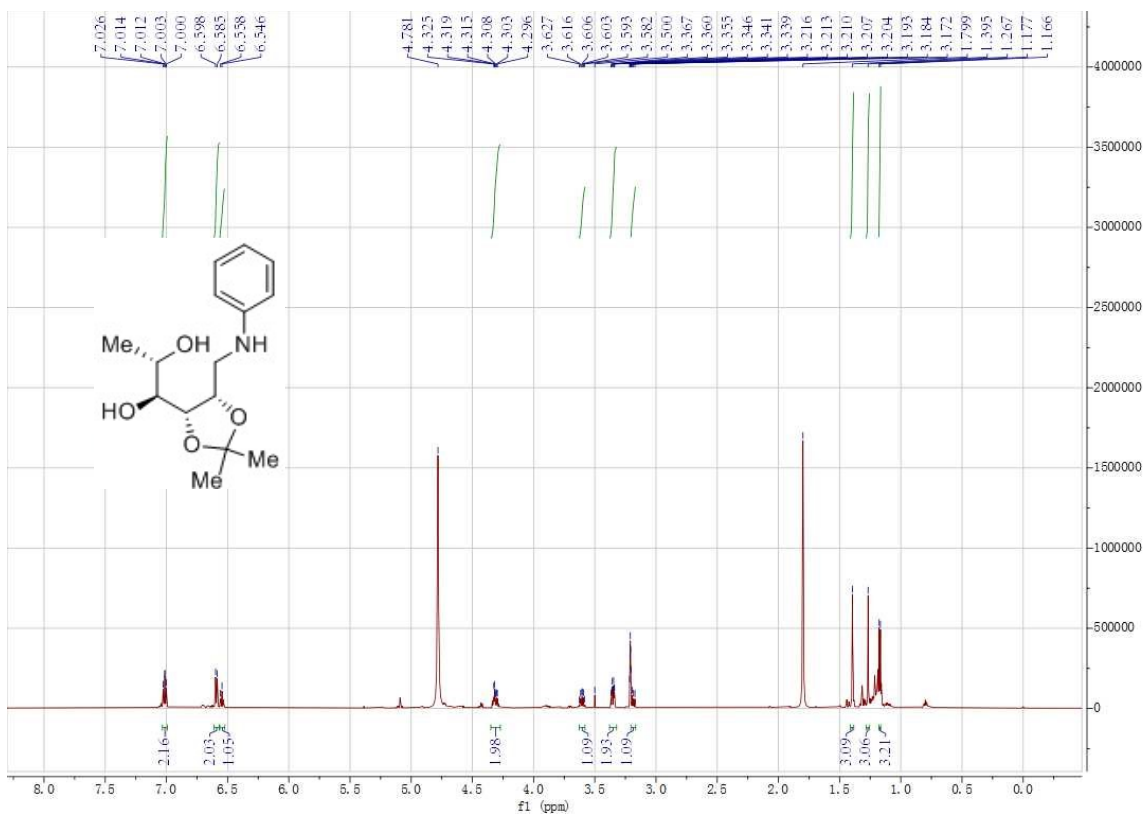

Figure. S77<sup>1</sup>H NMR of compound 1c

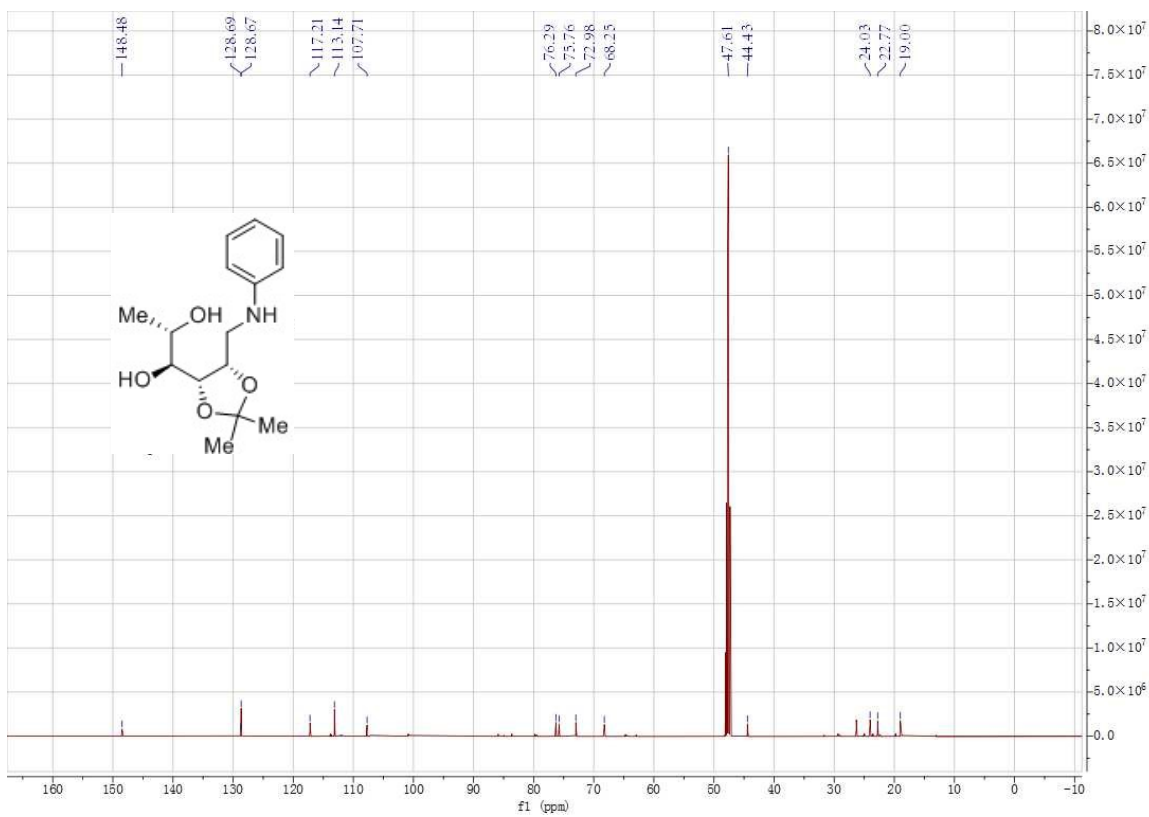

Figure. S78<sup>13</sup>C{<sup>1</sup>H} NMR of compound 1c

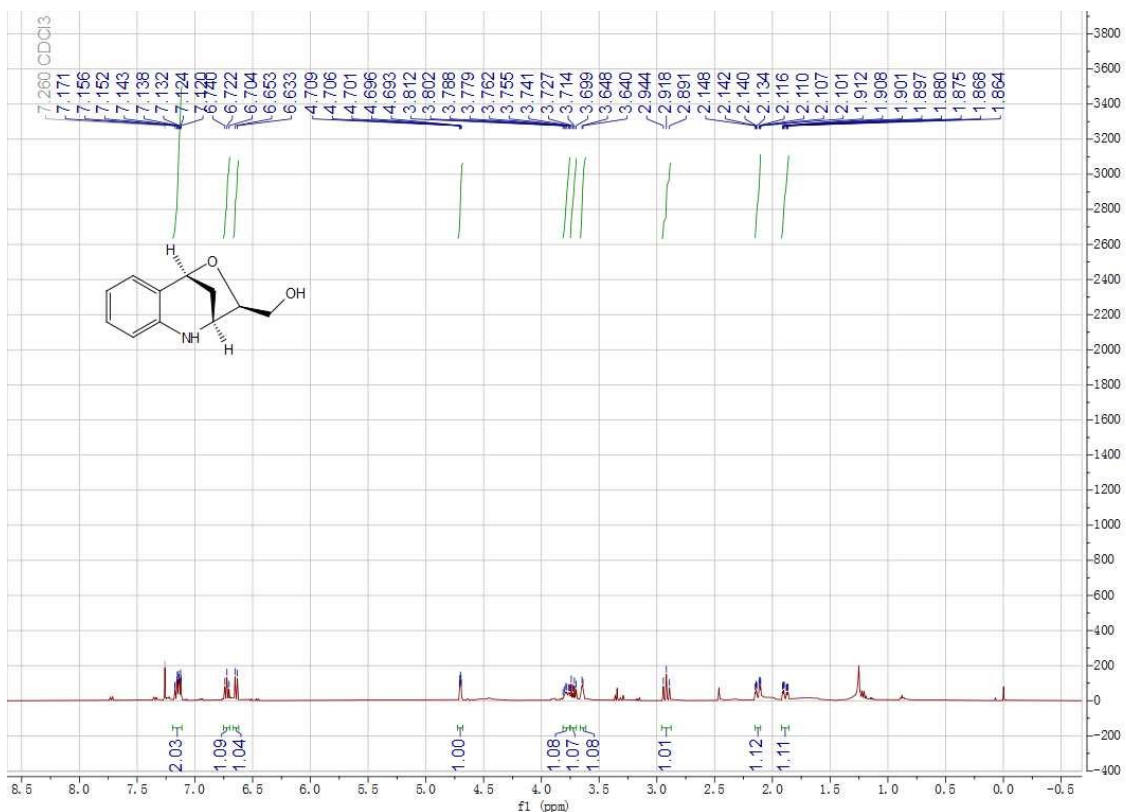

Figure. S79<sup>1</sup>H NMR of compound 2c

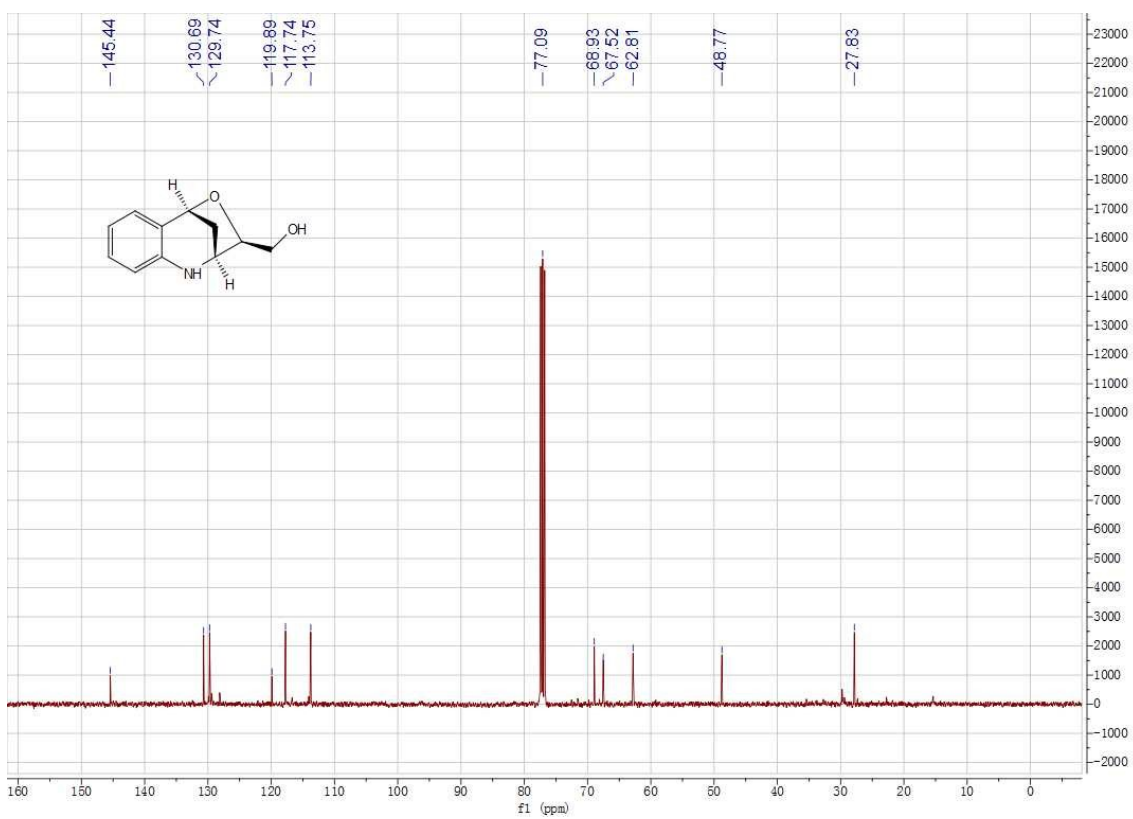

Figure. S80<sup>13</sup>C{<sup>1</sup>H} NMR of compound 2c



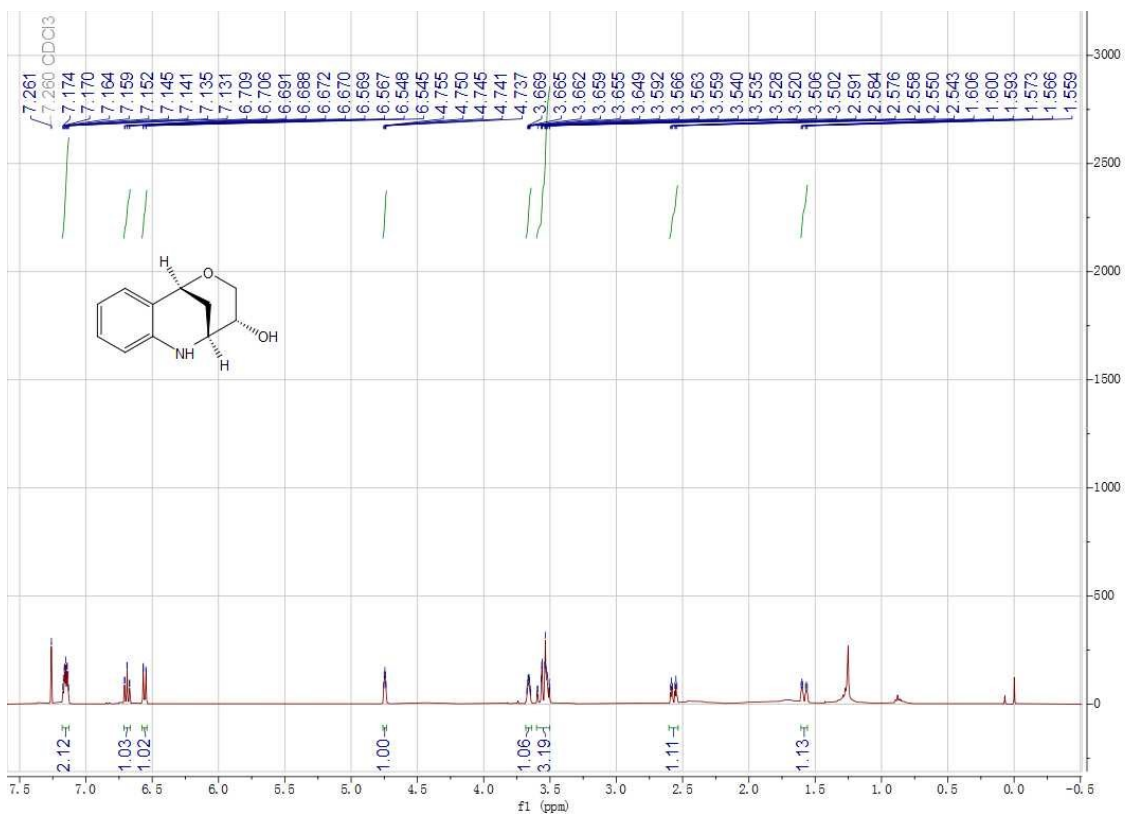

Figure. S81  $^1\text{H}$  NMR of compound 2c'

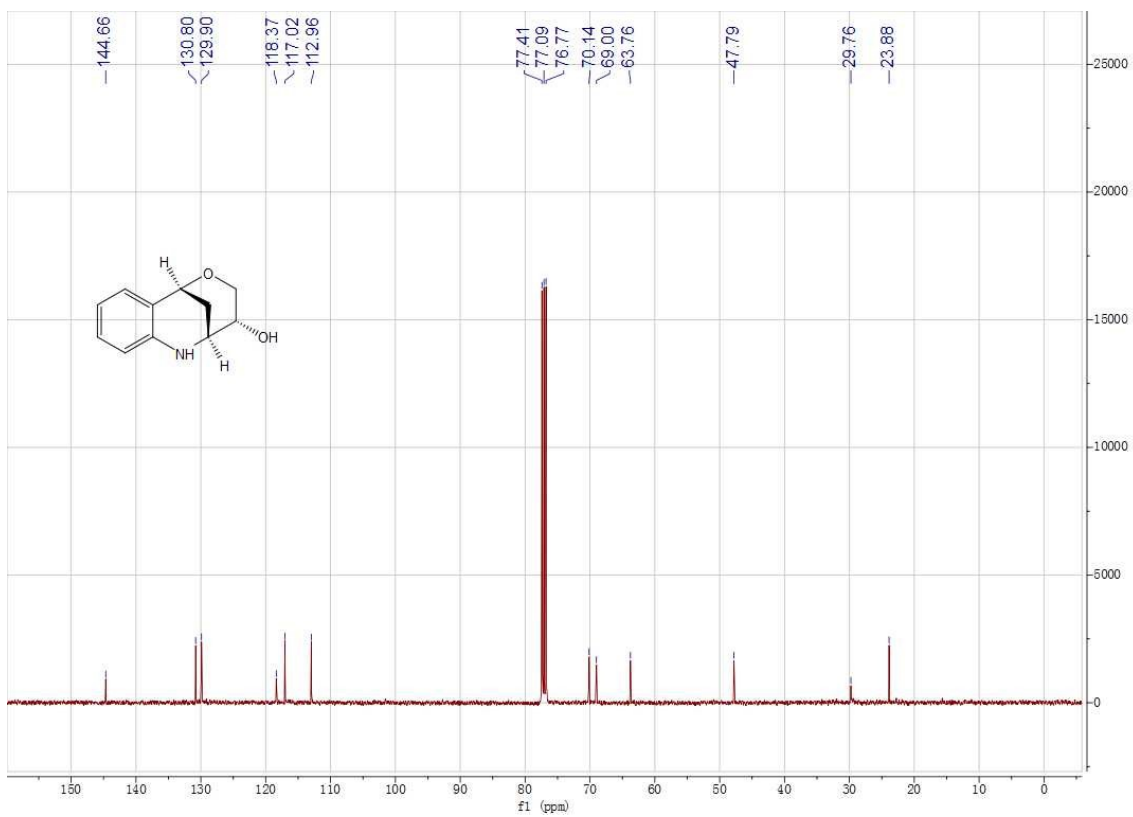

Figure. S82  $^{13}\text{C}\{^1\text{H}\}$  NMR of compound 2c'

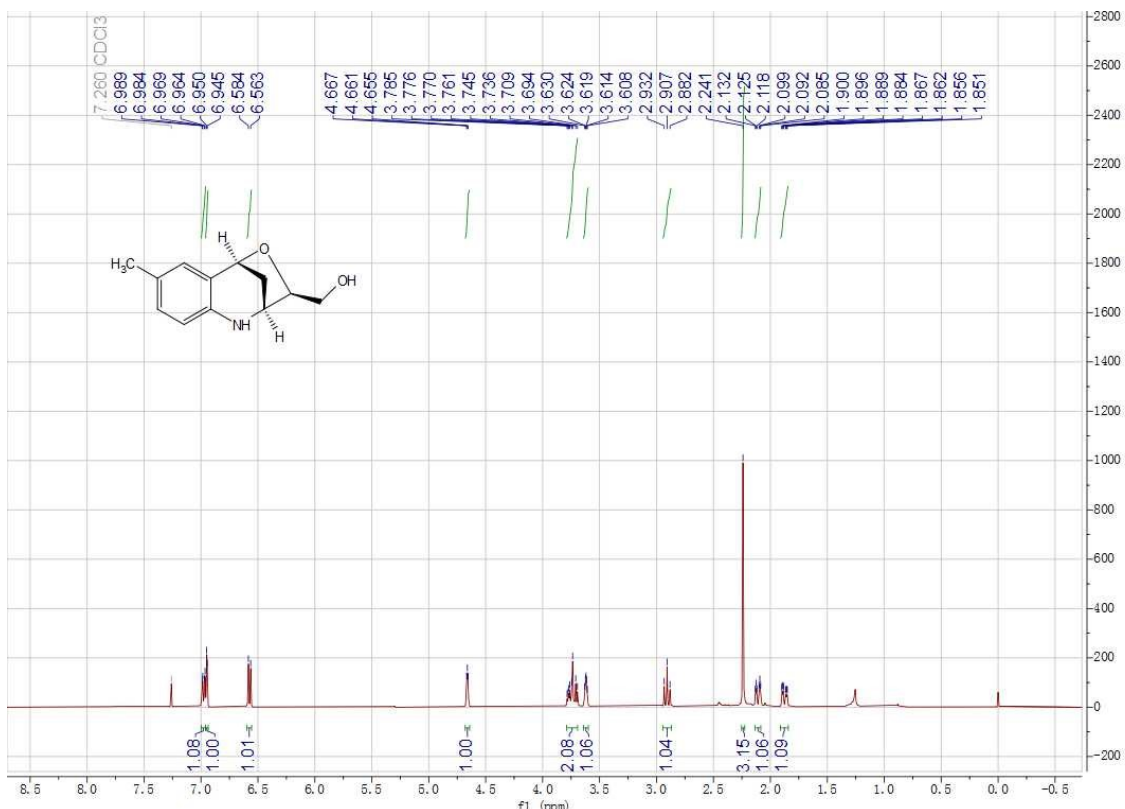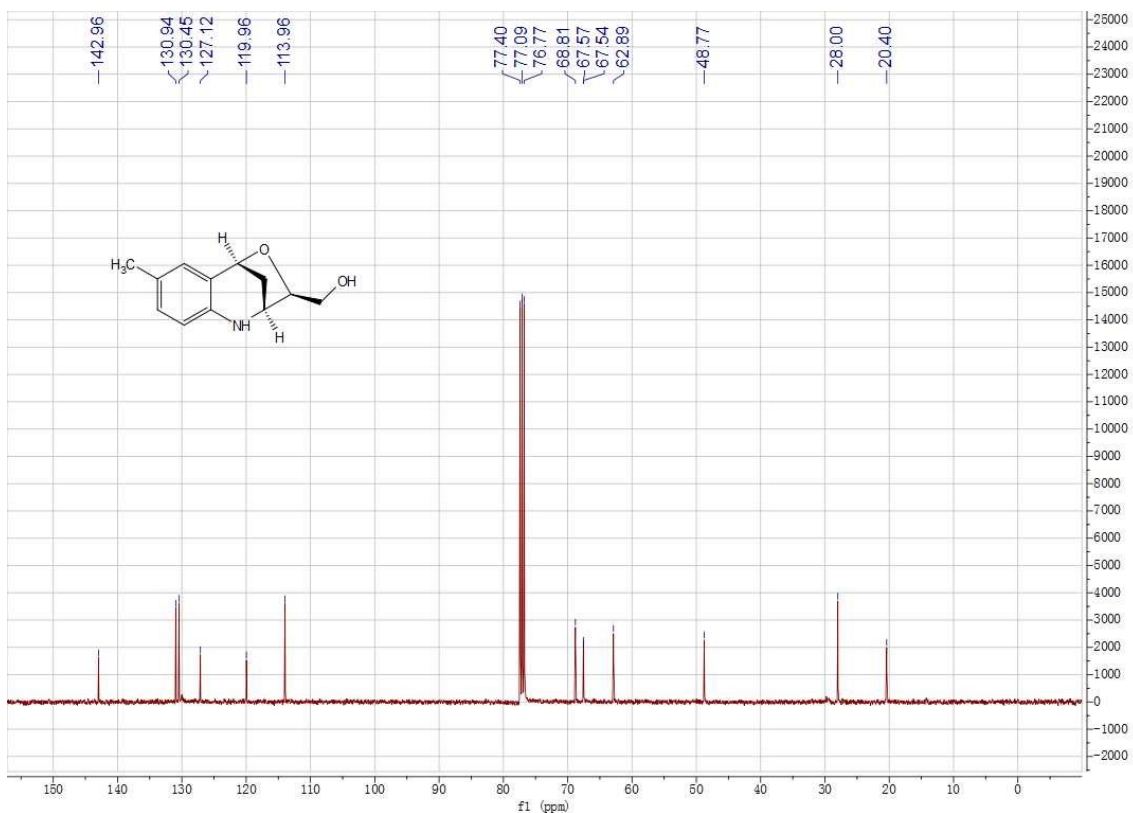

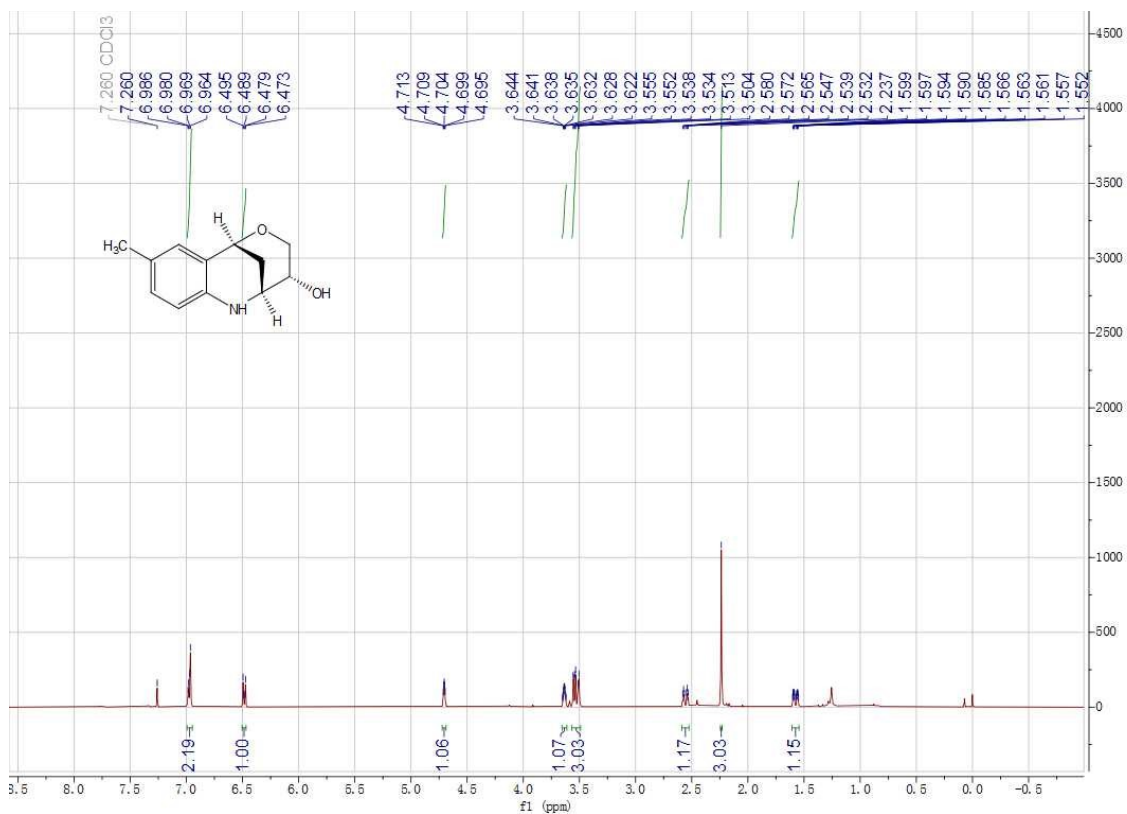

Figure. S85  $^1\text{H}$  NMR of compound 3c'

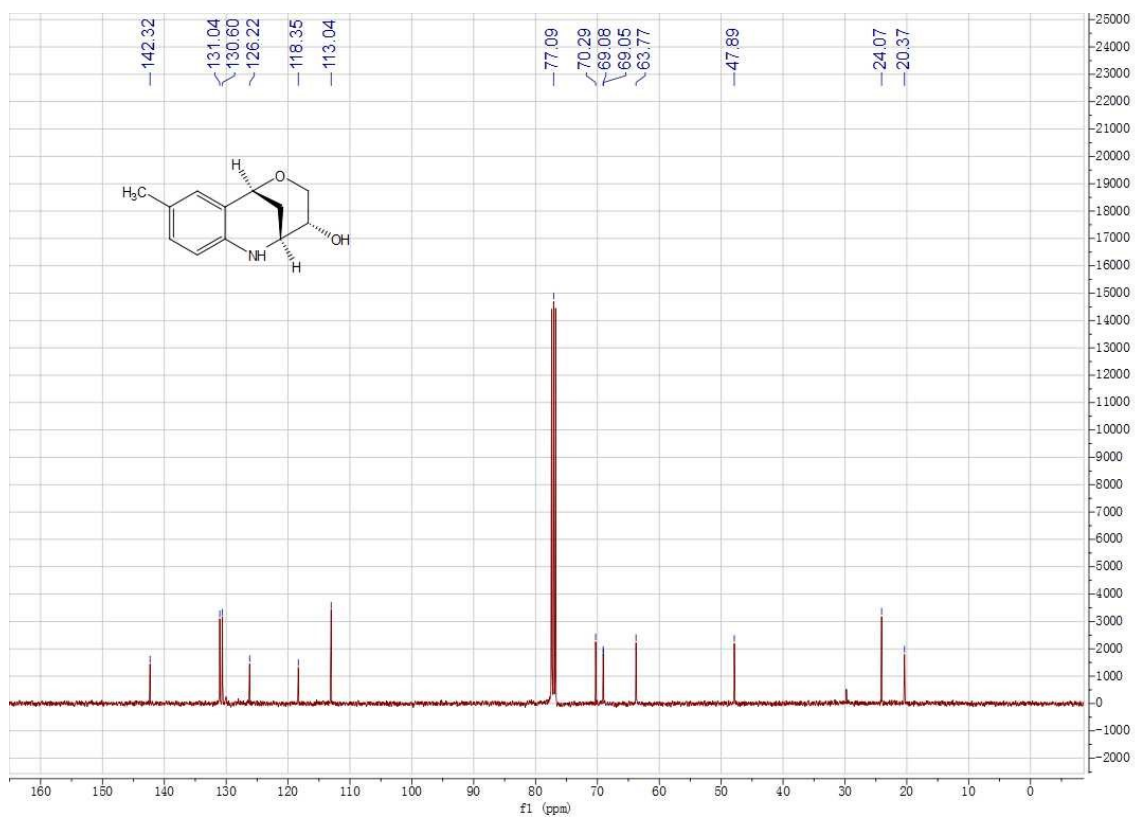

Figure. S86  $^{13}\text{C}\{^1\text{H}\}$  NMR of compound 3c'

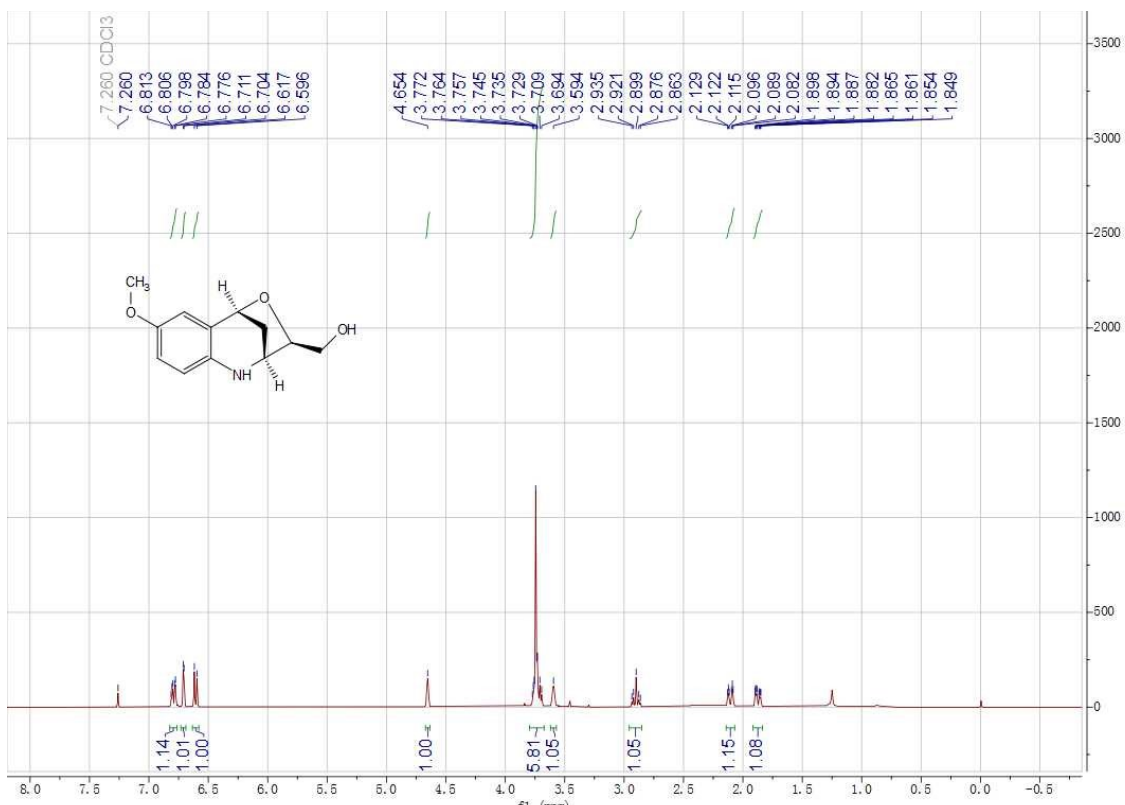

Figure. S87<sup>1</sup>H NMR of compound 4c

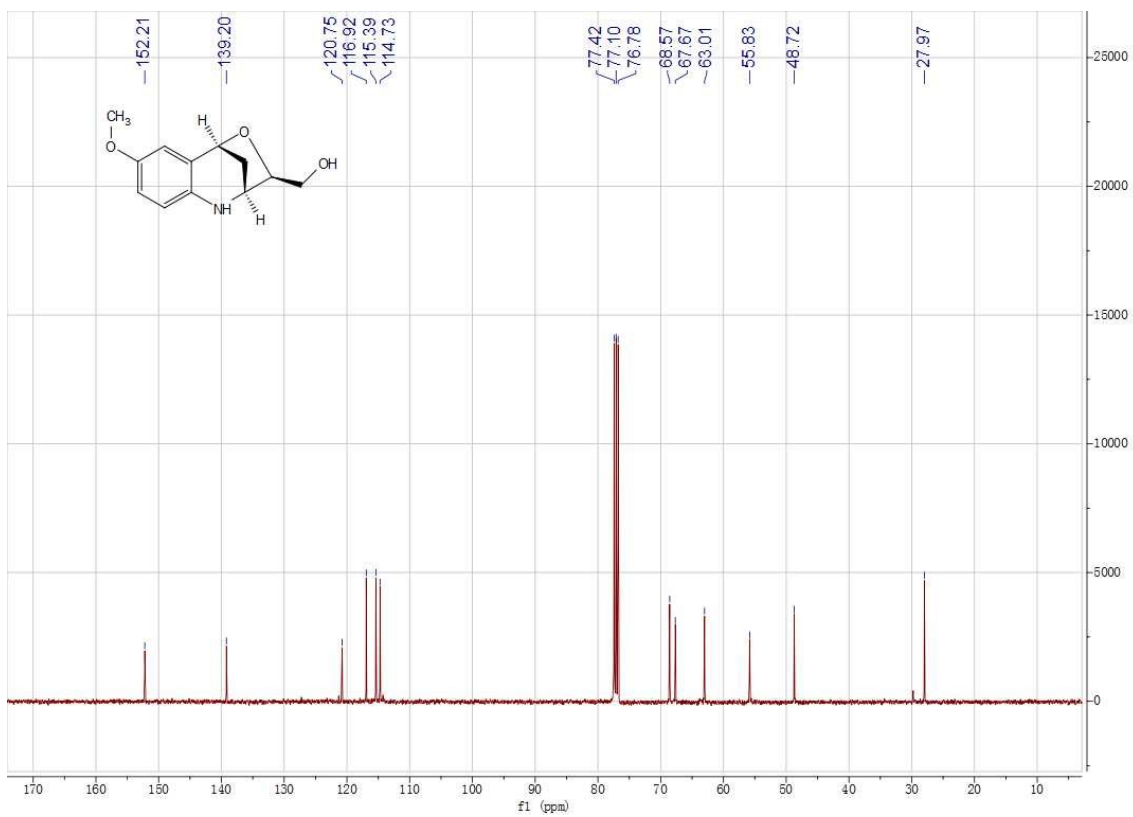

Figure. S88<sup>13</sup>C{<sup>1</sup>H} NMR of compound 4c

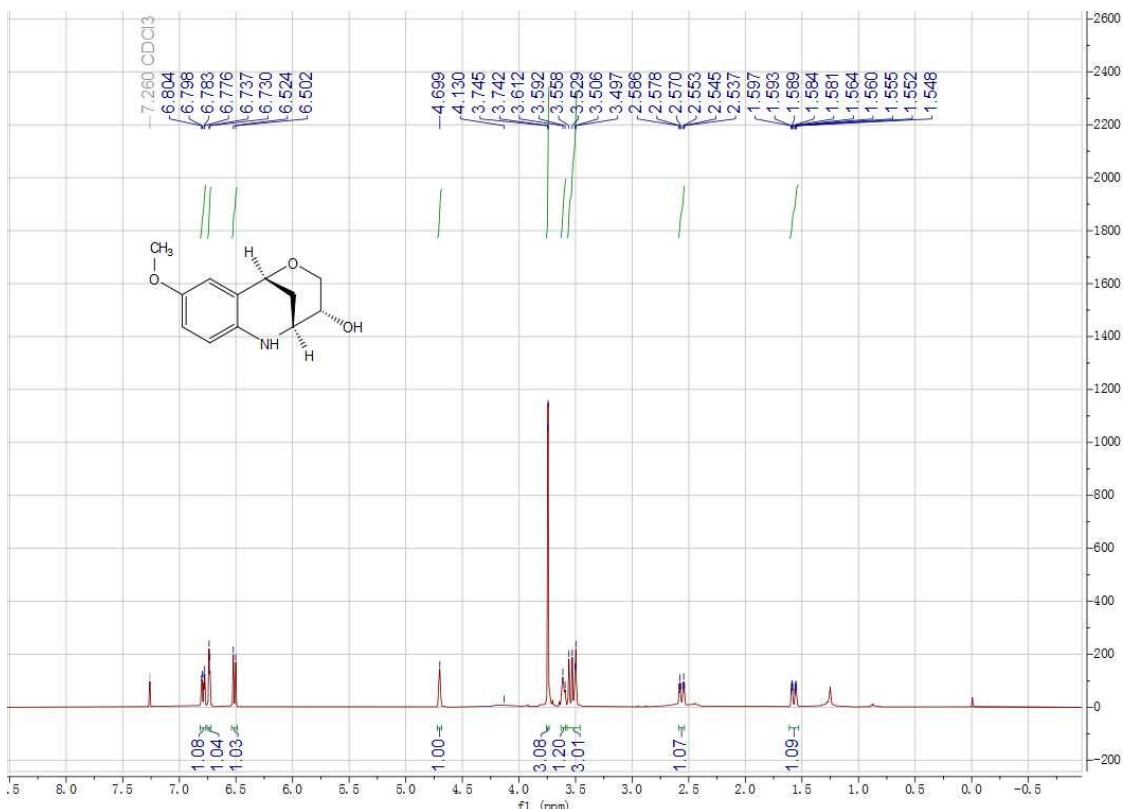

Figure. S89<sup>1</sup>H NMR of compound 4c'

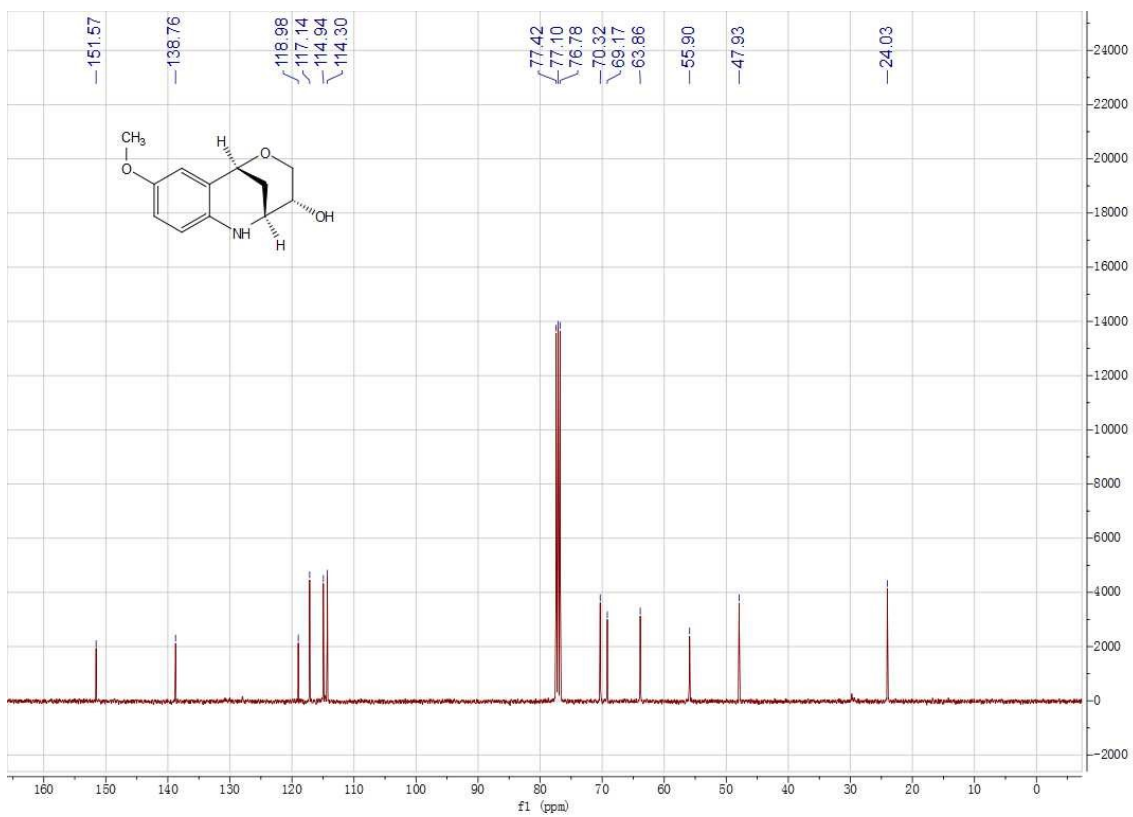

Figure. S90<sup>13</sup>C{<sup>1</sup>H} NMR of compound 4c'

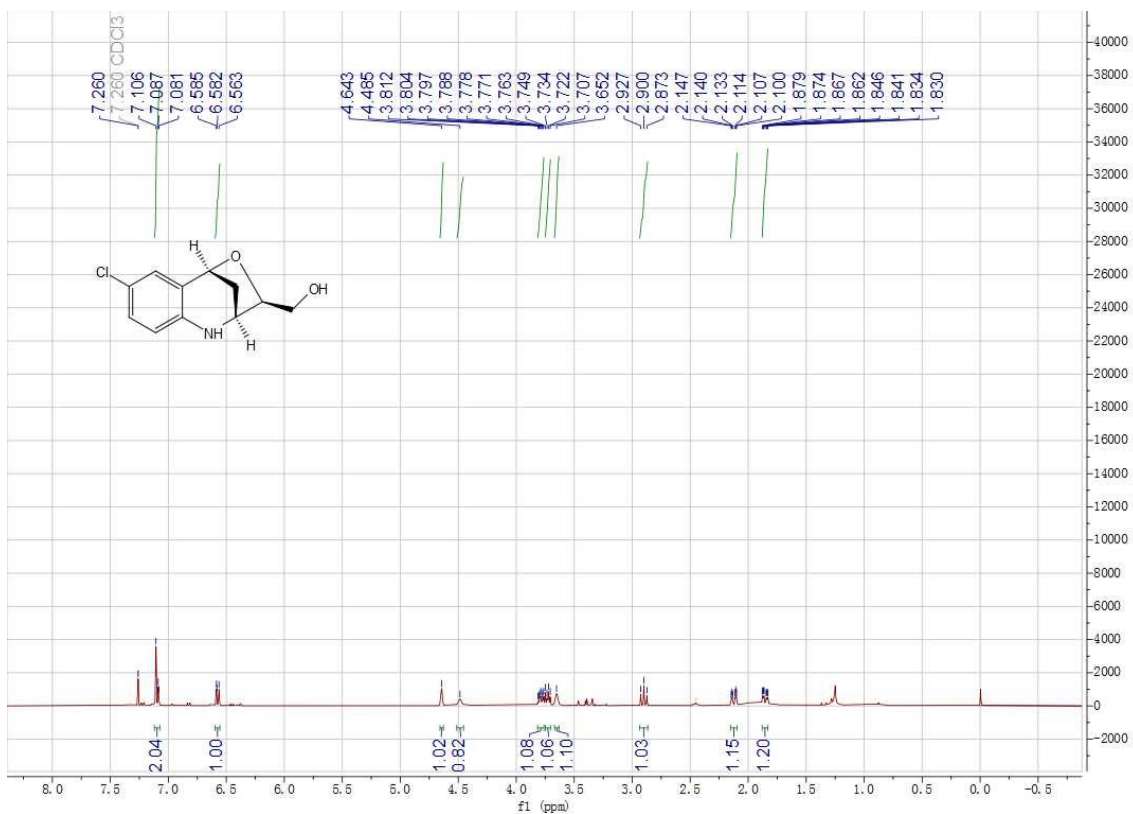

Figure. S91 <sup>1</sup>H NMR of compound 5c

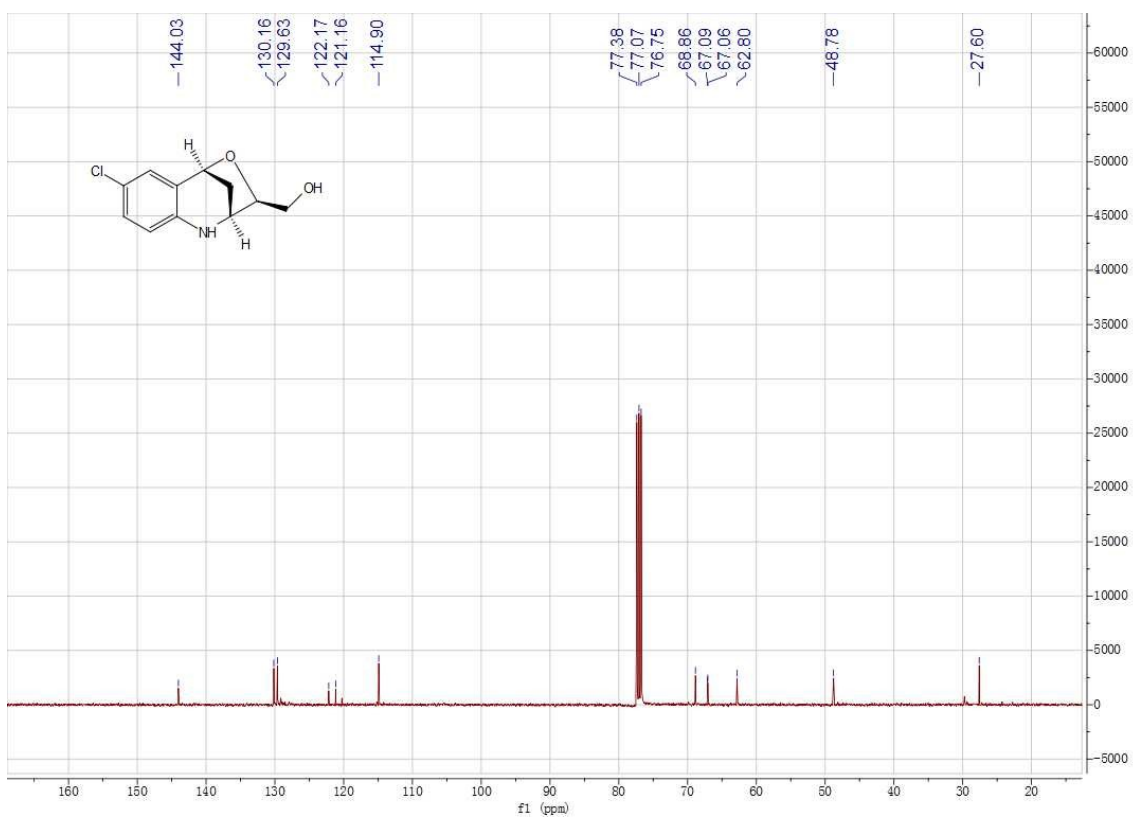

Figure. S92 <sup>13</sup>C{<sup>1</sup>H} NMR of compound 5c

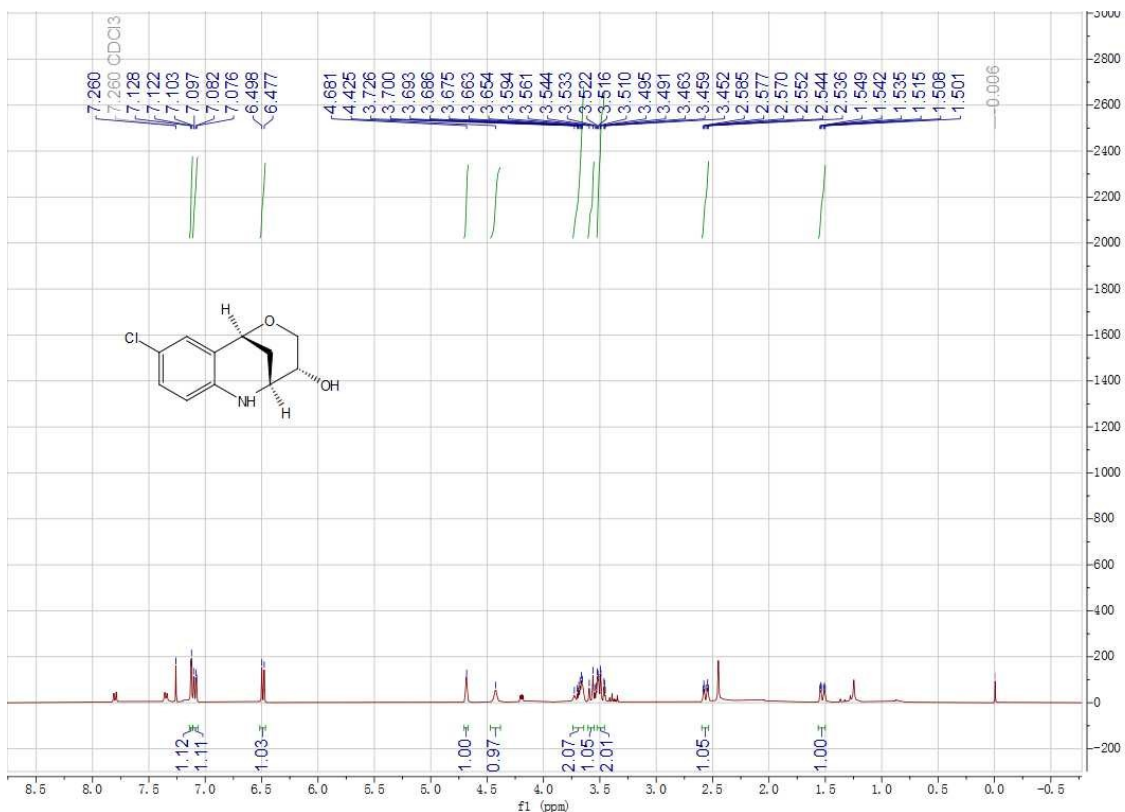

Figure. S93  $^1\text{H}$  NMR of compound 5c'

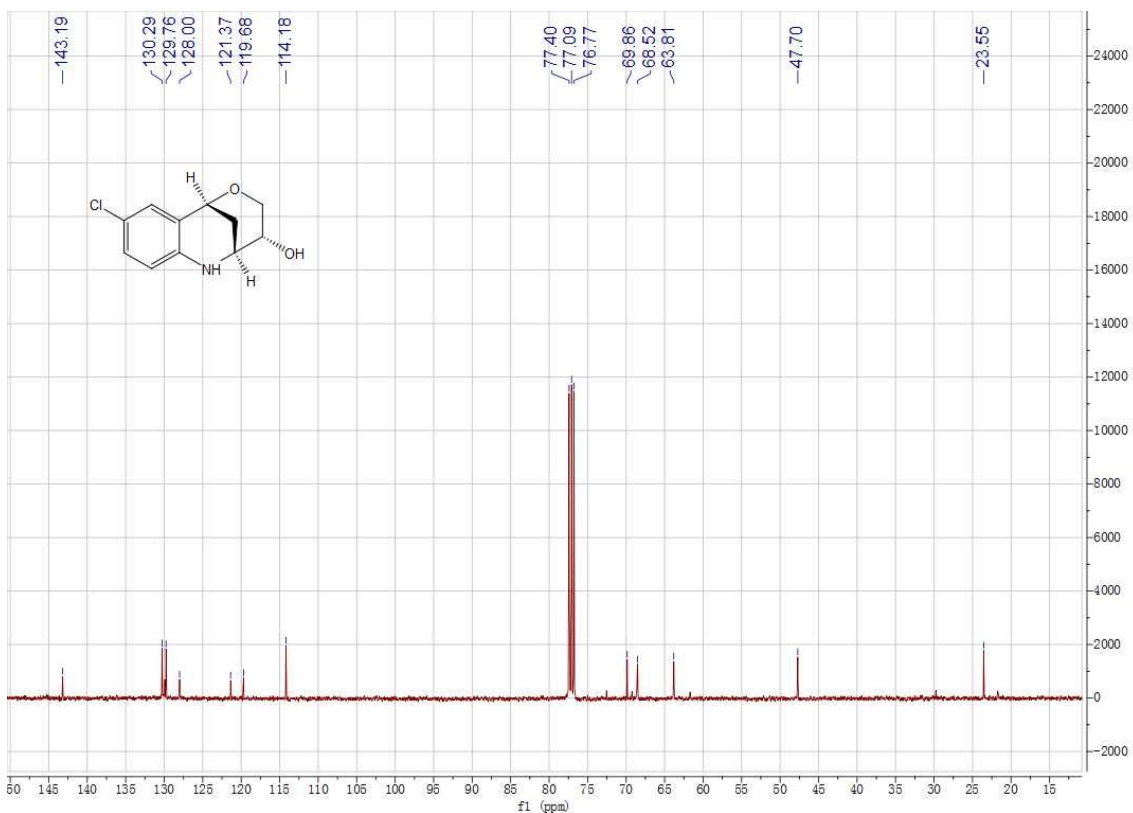

Figure. S94  $^{13}\text{C}\{^1\text{H}\}$  NMR of compound 5c'

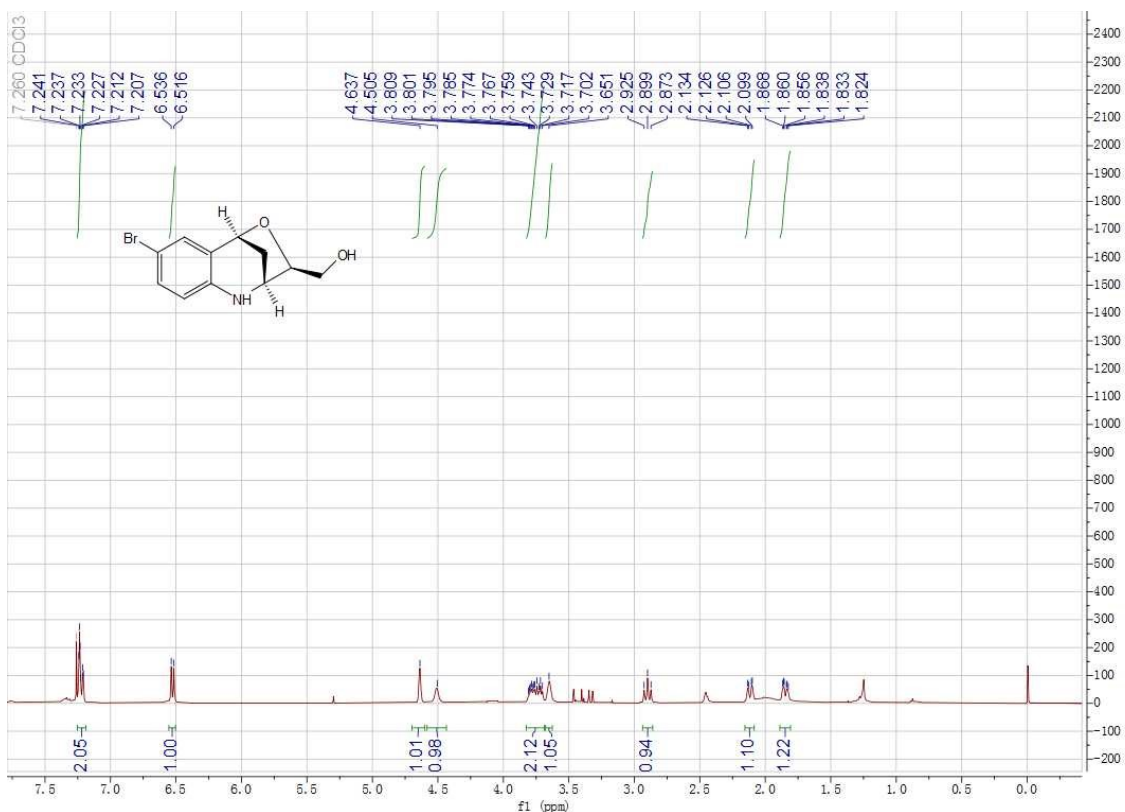

Figure. S95  $^1\text{H}$  NMR of compound 6c

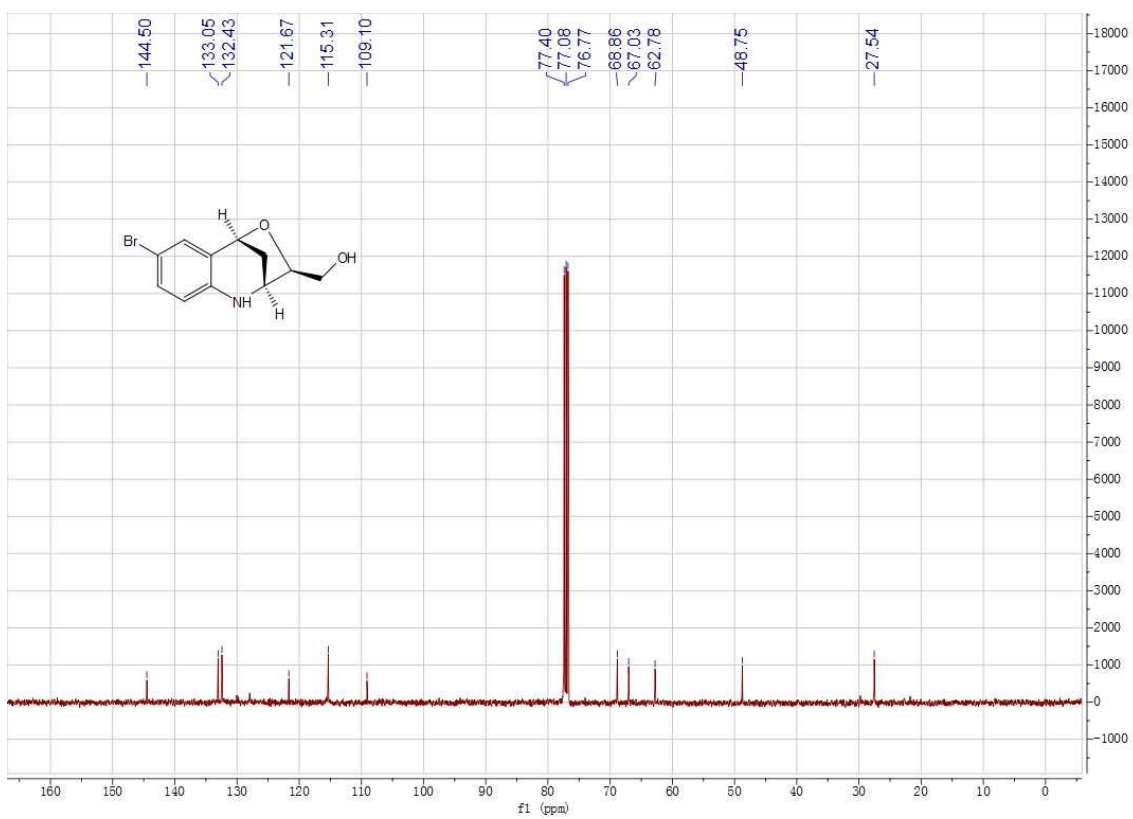

Figure. S96  $^{13}\text{C}\{^1\text{H}\}$  NMR of compound 6c



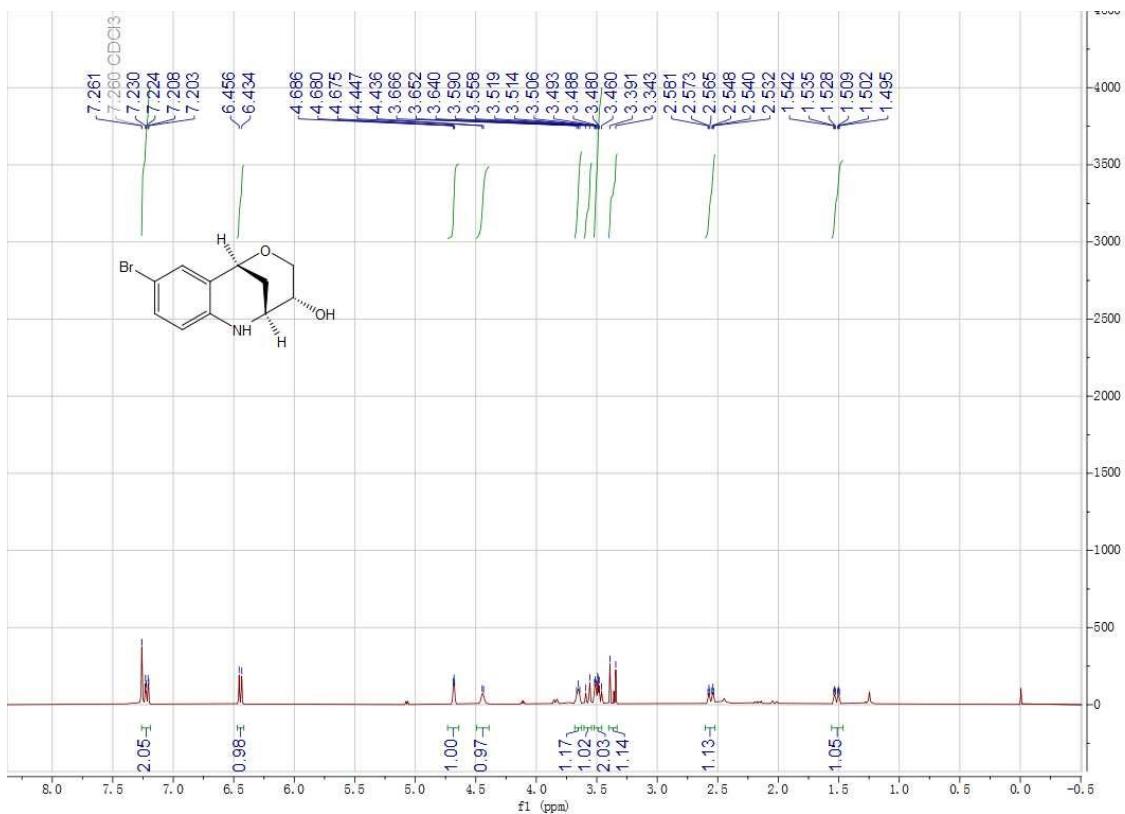

Figure. S97<sup>1</sup>H NMR of compound **6c'**

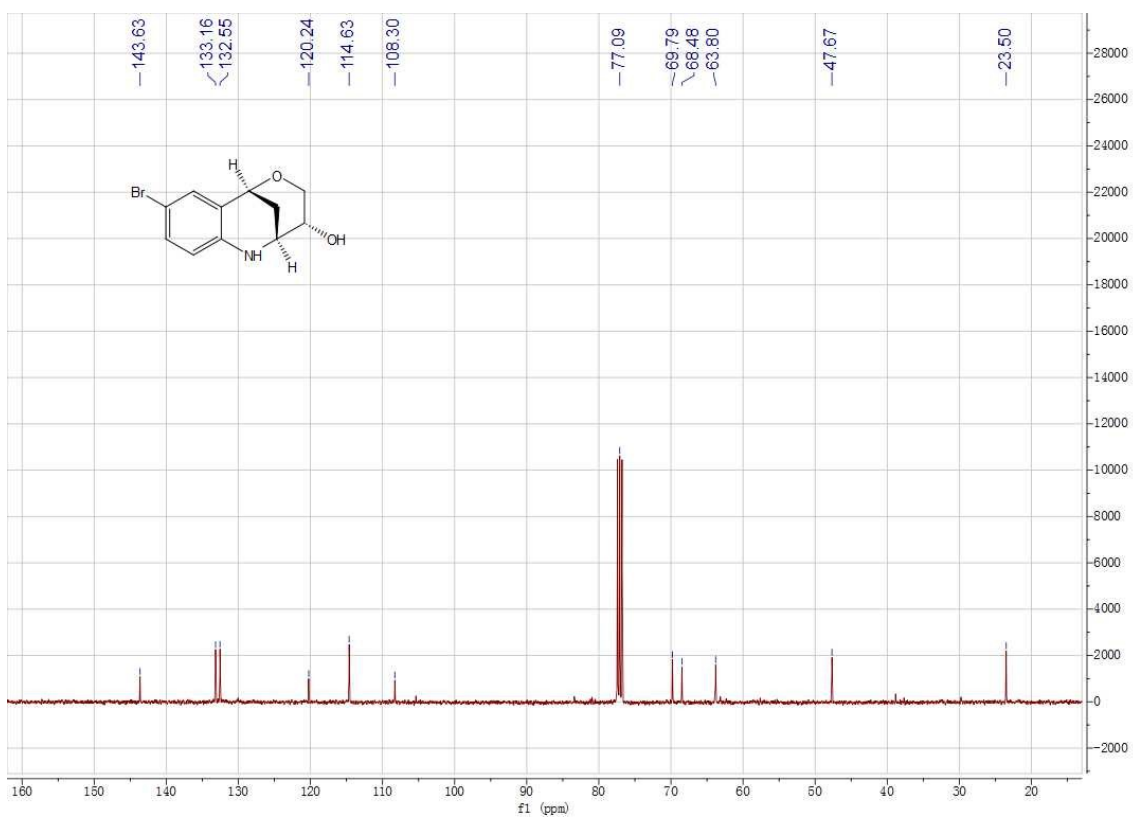

Figure. S98<sup>13</sup>C {<sup>1</sup>H} NMR of compound **6c'**

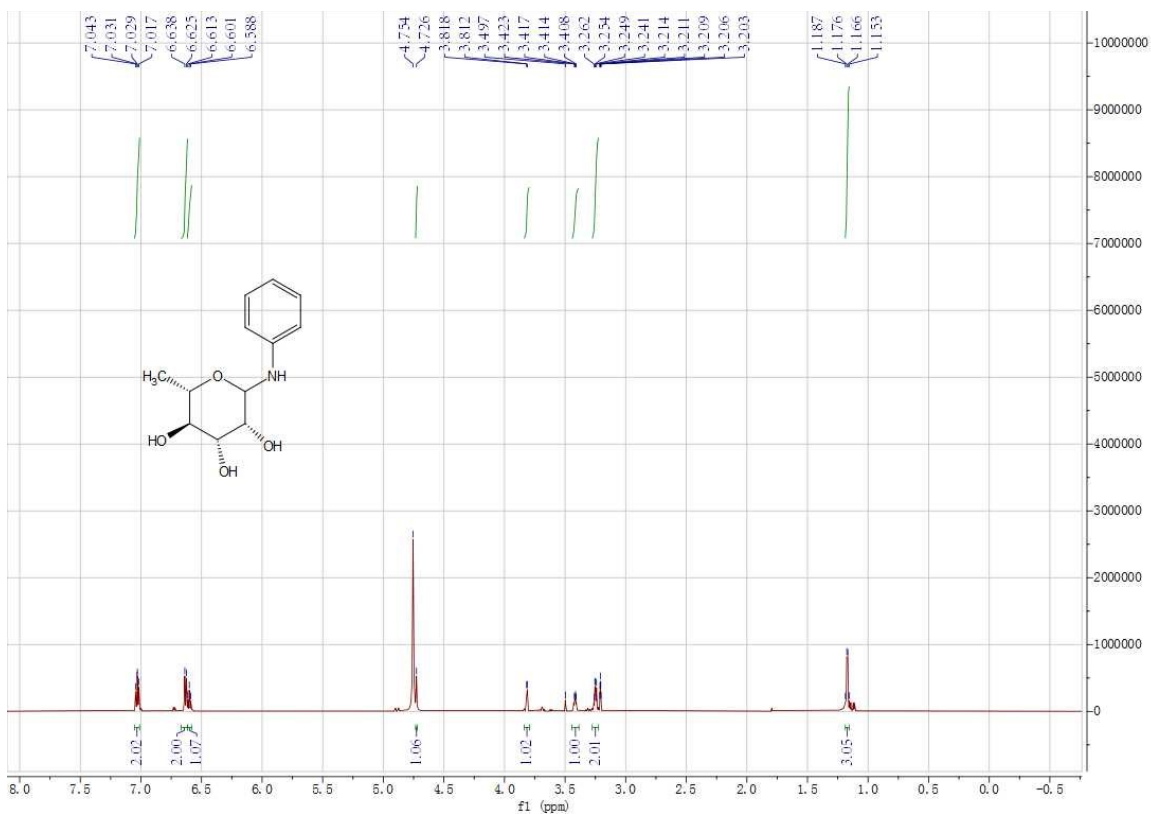

Figure. S99<sup>1</sup>H NMR of compound A

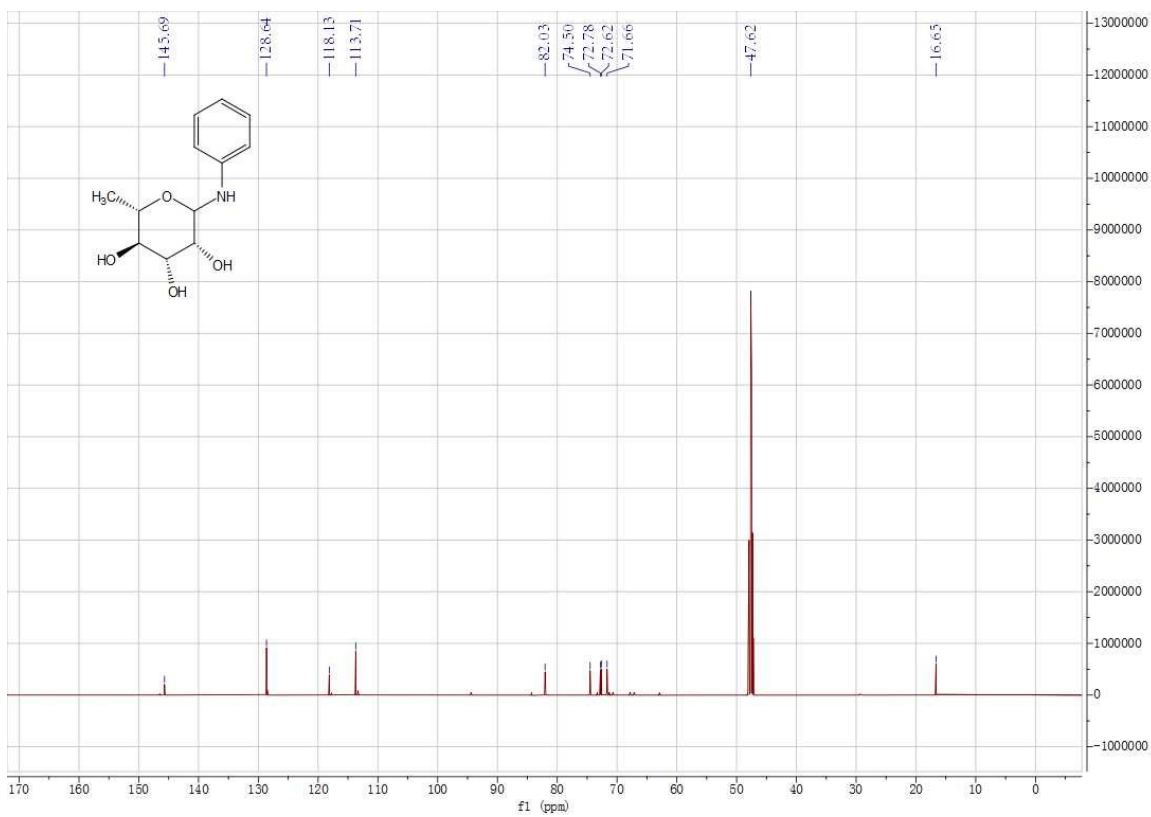

Figure. S100<sup>13</sup>C{<sup>1</sup>H} NMR of compound A

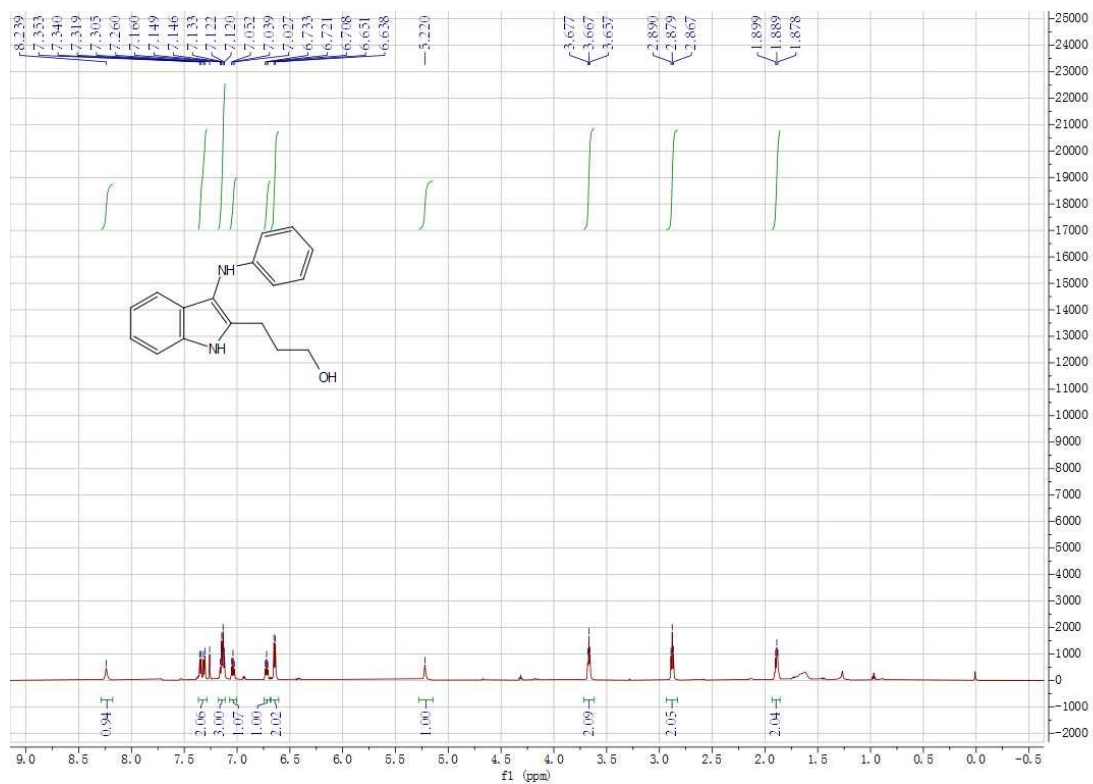

Figure. S101<sup>1</sup>H NMR of compound 7c

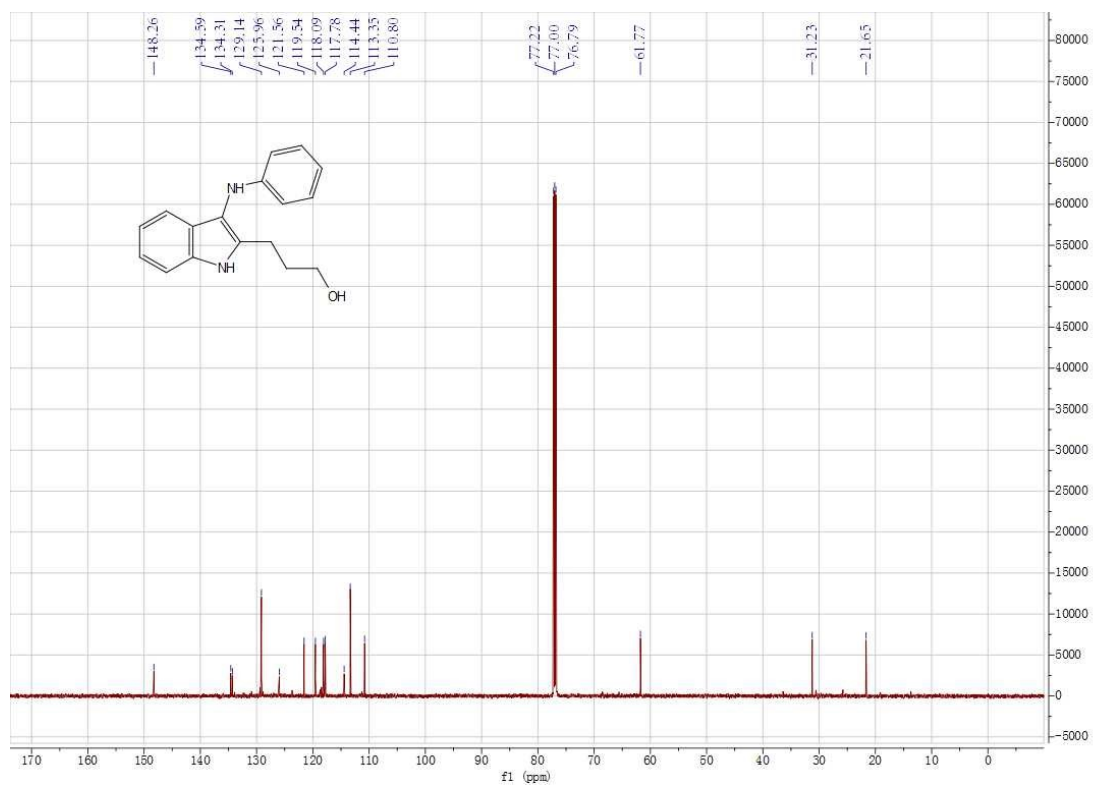

Figure. S102<sup>13</sup>C{<sup>1</sup>H} NMR of compound 7c

#### 4. 2D NMR analysis spectra

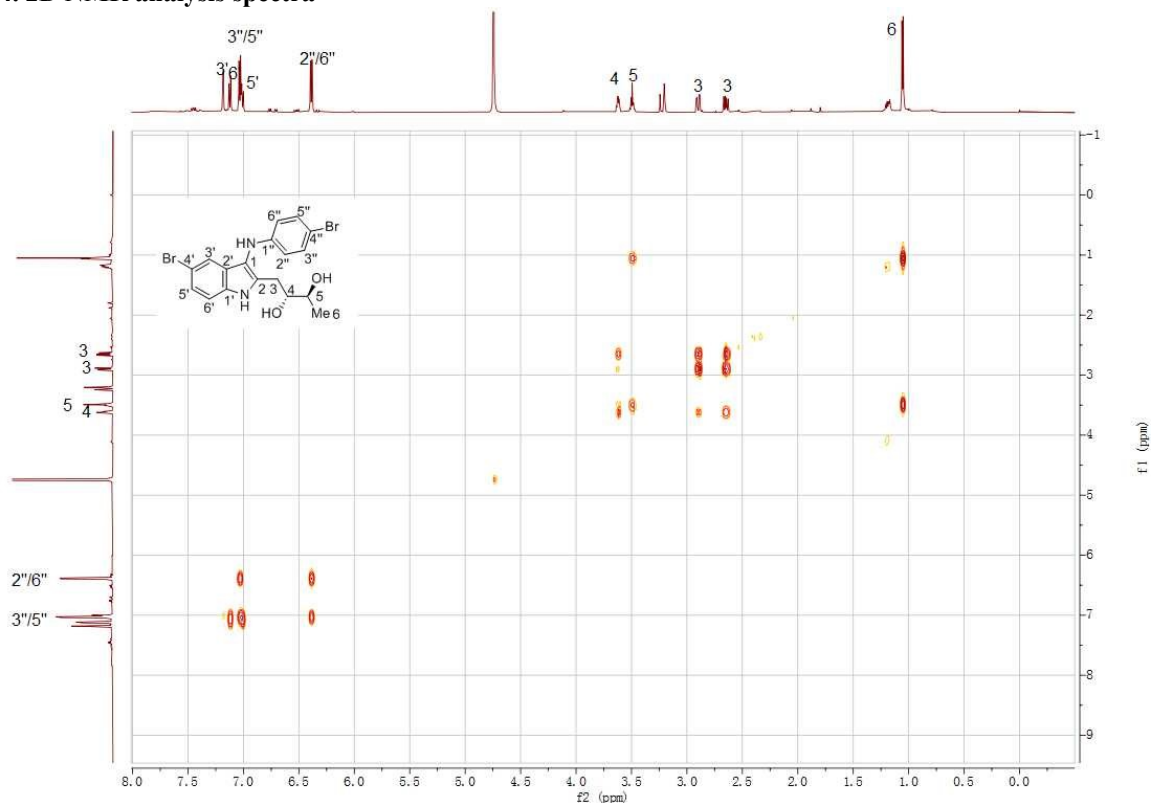

Figure. S103  $^1\text{H}$ - $^1\text{H}$  COSY 2D-NMR of compound **13a**

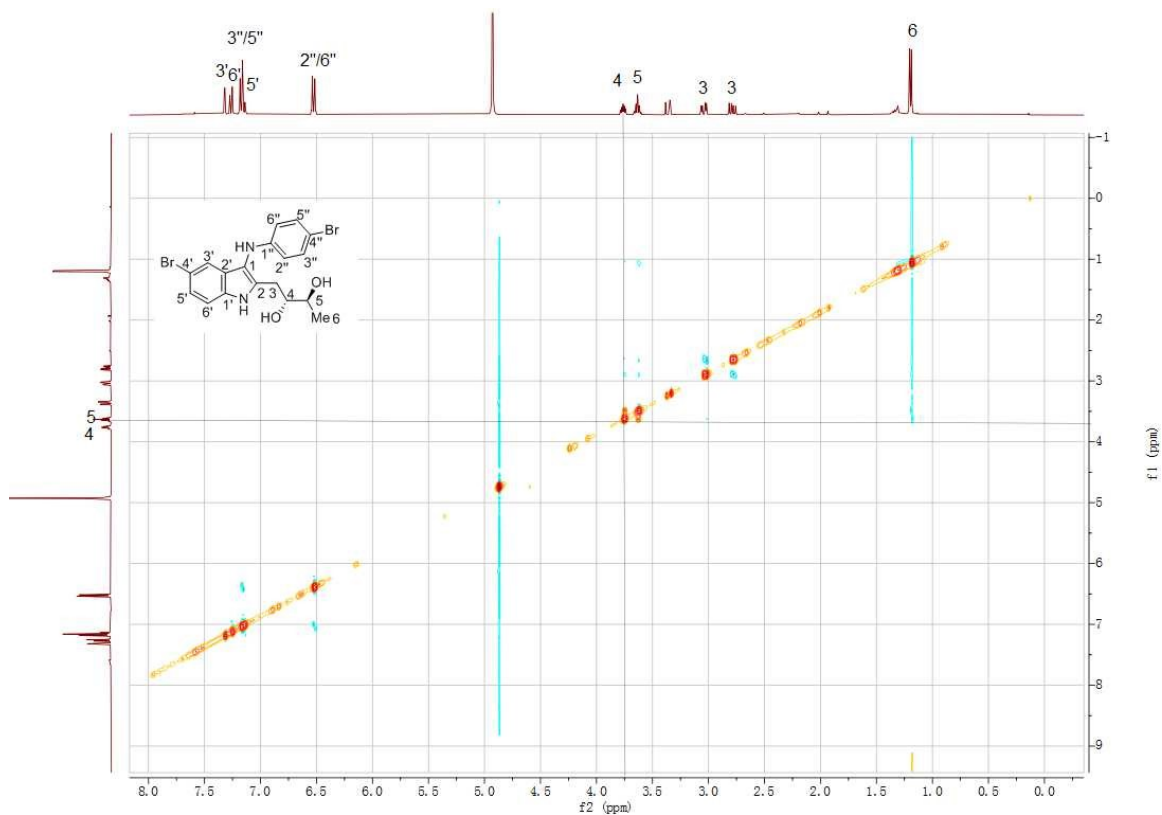

Figure. S104  $^1\text{H}$ - $^1\text{H}$  ROESY 2D-NMR of compound **13a**

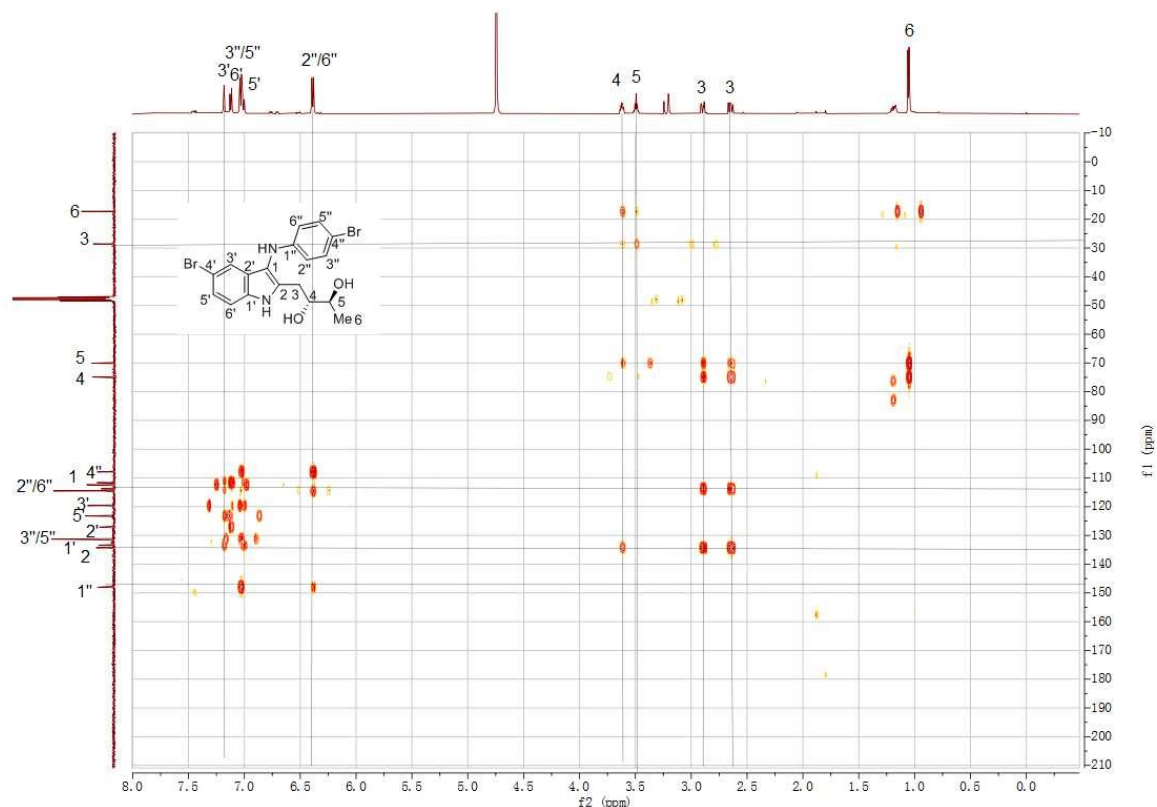

Figure. S105<sup>1</sup>H-<sup>13</sup>C HMBC 2D-NMR of compound **13a**

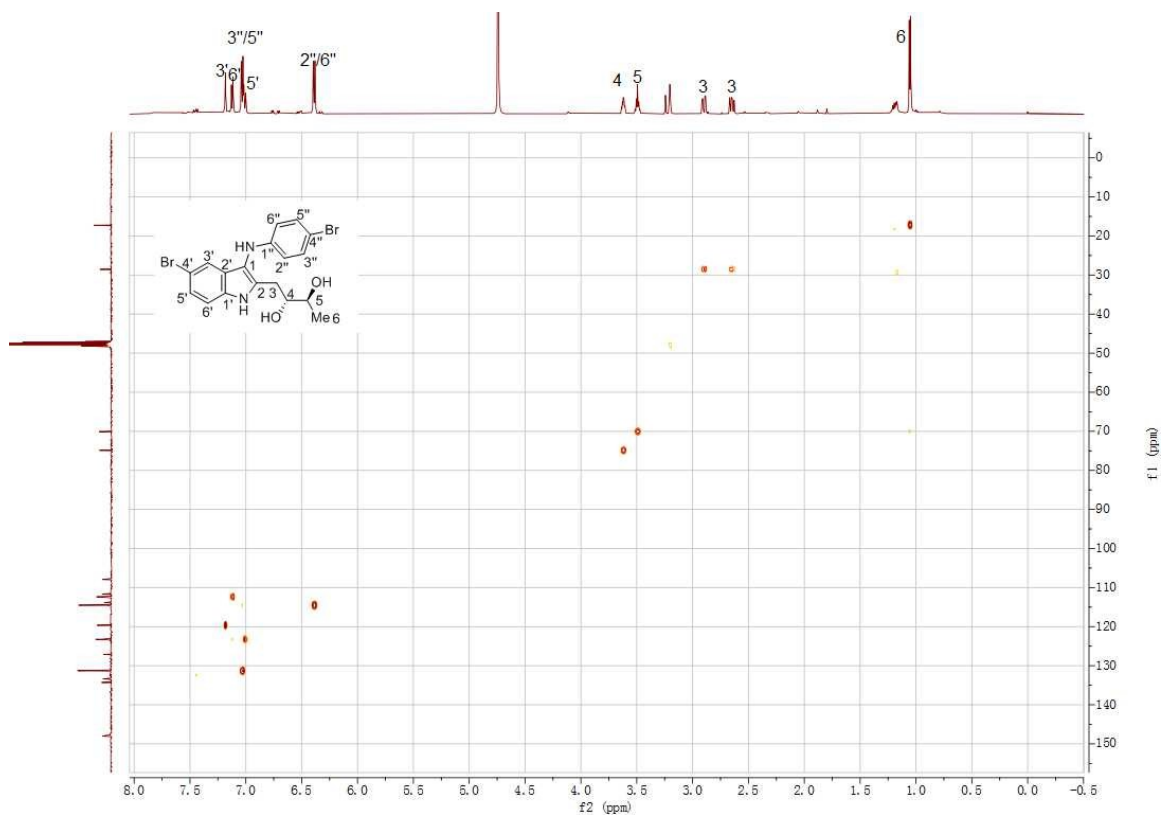

Figure. S106<sup>1</sup>H-<sup>13</sup>C HSQC 2D-NMR of compound **13a**

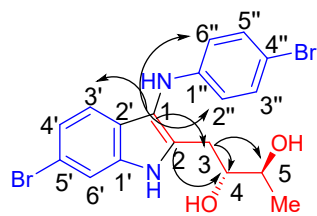

Figure S107 Key HMBC (C→H) correlations

## 5. High resolution mass spectra

**E, F, G, or 1a:** MS(ESI): Calculated for  $C_{18}H_{21}N_2O_2$  ( $[M+H]^+$ ): 297.1598, found: 297.1597.

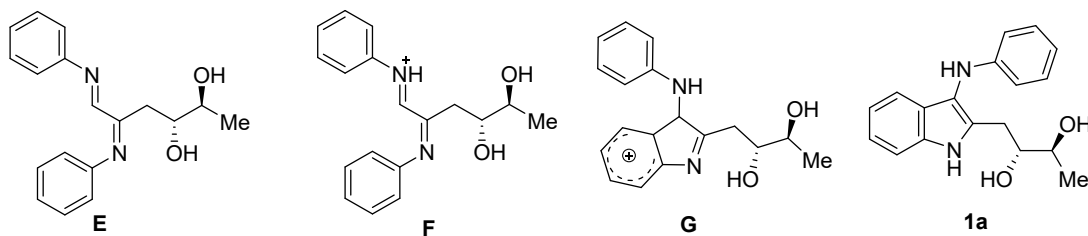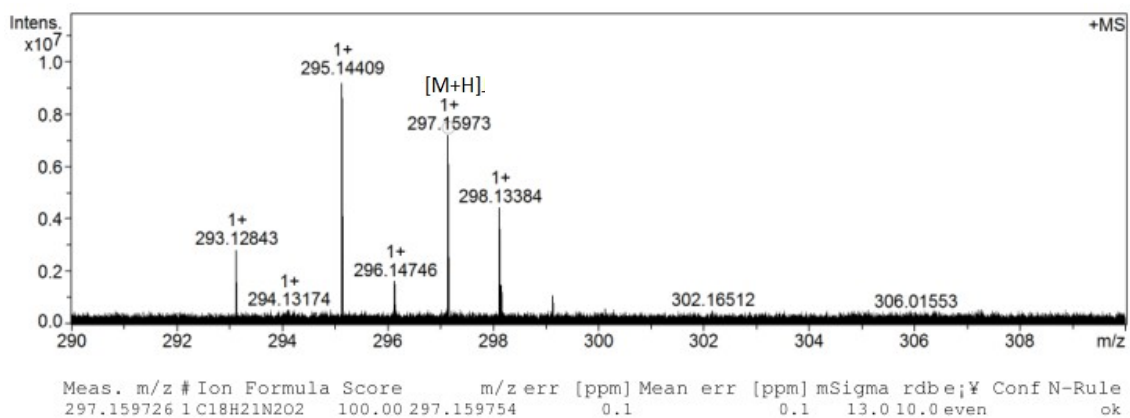

Figure S108 High resolution mass spectrum of compound 1a or intermediate I, J.

## 6. Crystal Information:

1: To determine the absolute configuration of **(2*S*,3*R*)-1-(3-(phenylamino)-1*H*-indol-2-yl)butane-2,3-diol (1a)**: Firstly, **1a** was recrystallized from dichloromethane/methanol. The solvents were slowly evaporated directly, and the single crystal was obtained after three days. The CCDC number is 2301597.

```
Bond precision:  C-C = 0.0071 Å           Wavelength=0.71073

Cell:           a=5.4476(4)           b=9.3390(8)           c=15.3977(12)
                alpha=75.371(3)       beta=87.564(2)        gamma=85.468(3)
Temperature:    100 K

                Calculated           Reported
Volume          755.39(10)           755.39(10)
Space group     P 1                   P 1
Hall group      P 1                   P 1
Moiety formula  C18 H20 N2 O2                   C18 H20 N2 O2
Sum formula     C18 H20 N2 O2                   C18 H20 N2 O2
Mr              296.36                   296.36
Dx,g cm-3      1.303                     1.303
Z               2                       2
Mu (mm-1)      0.086                     0.086
F000           316.0                     316.0
F000'          316.13
h,k,lmax       6,11,19                   6,11,19
Nref           6188[ 3094]                 4859
Tmin,Tmax      0.992,0.996                   0.534,0.745
Tmin'          0.987

Correction method= # Reported T Limits: Tmin=0.534 Tmax=0.745
AbsCorr = MULTI-SCAN

Data completeness= 1.57/0.79           Theta(max)= 26.422

R(reflections)= 0.0546( 3848)           wR2(reflections)=
S = 1.061                               0.1295( 4859)
Npar= 417
```



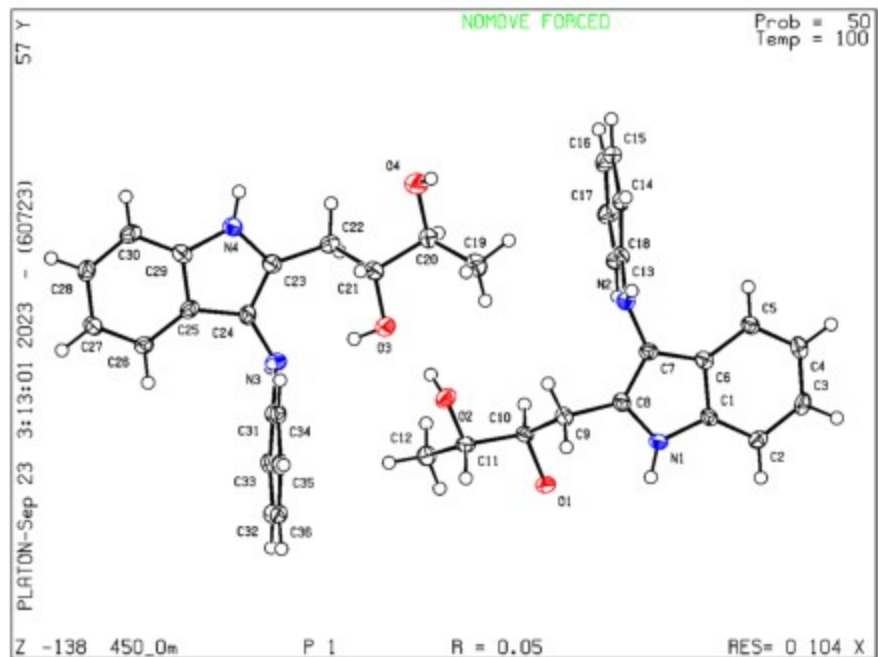

Figure S109 Crystal information of **1a**

2: To determine the absolute configuration of **((3*R*)-7-methyl-1,2,3,5-tetrahydro-2,5-methanobenzo[*e*][1,4]oxazepin-3-yl)methanol**: Firstly, **(3*c'*)** was recrystallized from dichloromethane/methanol. The solvents were slowly evaporated directly, and the single crystal was obtained after three days. The CCDC number is 2303074.

Bond precision: C-C = 0.0066 Å Wavelength=0.71073  
 Cell: a=6.163(2) b=10.528(4) c=32.488(12)  
 alpha=90 beta=90 gamma=90  
 Temperature: 273 K

|                        | Calculated   | Reported     |
|------------------------|--------------|--------------|
| Volume                 | 2108.0(13)   | 2108.0(13)   |
| Space group            | P 21 21 21   | P 21 21 21   |
| Hall group             | P 2ac 2ab    | P 2ac 2ab    |
| Moiety formula         | C12 H13 N O2 | C12 H13 N O2 |
| Sum formula            | C12 H13 N O2 | C12 H13 N O2 |
| Mr                     | 203.23       | 203.23       |
| Dx, g cm <sup>-3</sup> | 1.281        | 1.281        |
| Z                      | 8            | 8            |
| Mu (mm <sup>-1</sup> ) | 0.088        | 0.088        |
| F000                   | 864.0        | 864.0        |
| F000'                  | 864.40       |              |
| h, k, lmax             | 8, 13, 42    | 8, 13, 42    |
| Nref                   | 4933[ 2858]  | 4863         |
| Tmin, Tmax             | 0.997, 0.998 | 0.664, 0.746 |
| Tmin'                  | 0.997        |              |

Correction method= # Reported T Limits: Tmin=0.664 Tmax=0.746  
 AbsCorr = MULTI-SCAN

Data completeness= 1.70/0.99 Theta(max)= 27.717

R(reflections)= 0.0600( 2936) wR2(reflections)=  
 0.1568( 4863)  
 S = 1.091 Npar= 273

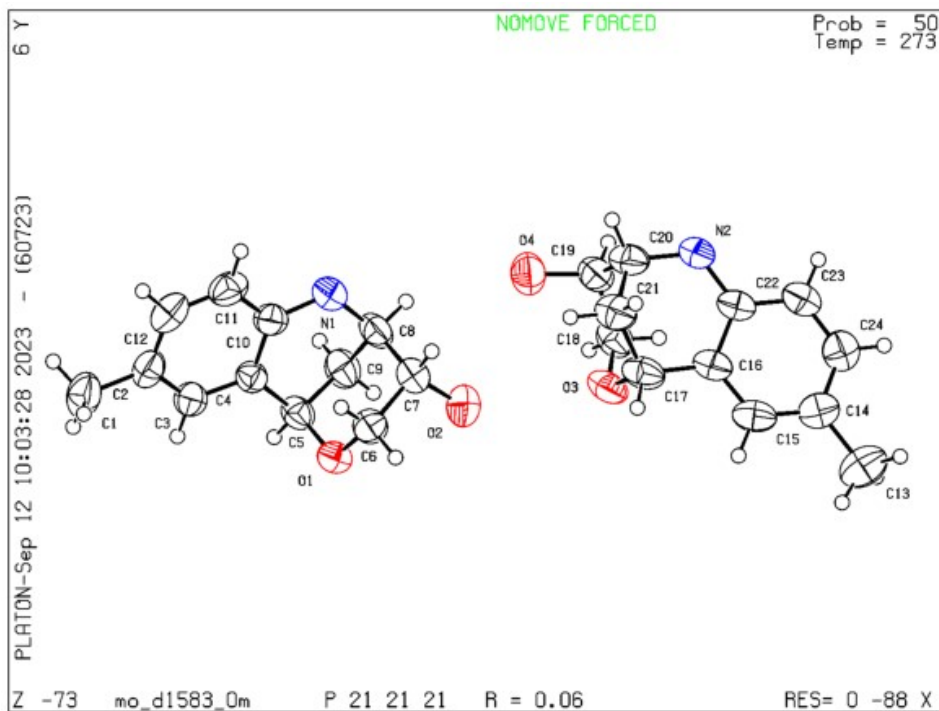

Figure S110 Crystal information of 3c'
